# Supplementary material for: Low back pain in the Bangladeshi adult population: a cross-sectional national survey
Source: PubMed Central journal article supplement (PMC9462101; doi:10.1136/bmjopen-2021-059192), 2022-09-08
Supplement: bmjopen-2021-059192.draft_revisions.pdf [file bmjopen-2021-059192.draft_revisions.pdf]

# BMJ Open

BMJ Open is committed to open peer review. As part of this commitment we make the peer review history of every article we publish publicly available.

When an article is published we post the peer reviewers' comments and the authors' responses online. We also post the versions of the paper that were used during peer review. These are the versions that the peer review comments apply to.

The versions of the paper that follow are the versions that were submitted during the peer review process. They are not the versions of record or the final published versions. They should not be cited or distributed as the published version of this manuscript.

BMJ Open is an open access journal and the full, final, typeset and author-corrected version of record of the manuscript is available on our site with no access controls, subscription charges or pay-per-view fees (<http://bmjopen.bmj.com>).

If you have any questions on BMJ Open's open peer review process please email [info.bmjopen@bmj.com](mailto:info.bmjopen@bmj.com)

# BMJ Open

## Low Back Pain in the Bangladeshi Adult Population: A Cross-sectional National Survey

|                               |                                                                                                                                                                                                                                                                                                                                                                                                                                                                                                                                                                                                                                  |
|-------------------------------|----------------------------------------------------------------------------------------------------------------------------------------------------------------------------------------------------------------------------------------------------------------------------------------------------------------------------------------------------------------------------------------------------------------------------------------------------------------------------------------------------------------------------------------------------------------------------------------------------------------------------------|
| Journal:                      | <i>BMJ Open</i>                                                                                                                                                                                                                                                                                                                                                                                                                                                                                                                                                                                                                  |
| Manuscript ID                 | bmjopen-2021-059192                                                                                                                                                                                                                                                                                                                                                                                                                                                                                                                                                                                                              |
| Article Type:                 | Original research                                                                                                                                                                                                                                                                                                                                                                                                                                                                                                                                                                                                                |
| Date Submitted by the Author: | 10-Nov-2021                                                                                                                                                                                                                                                                                                                                                                                                                                                                                                                                                                                                                      |
| Complete List of Authors:     | Momen Majumder, Muhammad Shoaib; Bangabandhu Sheikh Mujib Medical University, Rheumatology<br>Hakim, Ferdous; World Health Organization Bangladesh<br>Bandhan, Iftexhar ; Bangabandhu Sheikh Mujib Medical University, Rheumatology<br>Razzaque, Mohammad Abdur; Chittagong Medical College, Medicine<br>Zahid-Al-Quadir, Ahmad ; Sylhet MAG Osmani Medical College, Medicine<br>Ahmed, Shamim; Bangabandhu Sheikh Mujib Medical University<br>Choudhury, Minhaj; Bangabandhu Sheikh Mujib Medical University, Rheumatology<br>Haq, Syed; Bangabandhu Sheikh Mujib Medical University, Rheumatology<br>Zaman, MM; WHO Bangladesh |
| Keywords:                     | EPIDEMIOLOGY, RHEUMATOLOGY, PUBLIC HEALTH                                                                                                                                                                                                                                                                                                                                                                                                                                                                                                                                                                                        |
|                               |                                                                                                                                                                                                                                                                                                                                                                                                                                                                                                                                                                                                                                  |

SCHOLARONE™  
Manuscripts

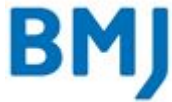

I, the Submitting Author has the right to grant and does grant on behalf of all authors of the Work (as defined in the below author licence), an exclusive licence and/or a non-exclusive licence for contributions from authors who are: i) UK Crown employees; ii) where BMJ has agreed a CC-BY licence shall apply, and/or iii) in accordance with the terms applicable for US Federal Government officers or employees acting as part of their official duties; on a worldwide, perpetual, irrevocable, royalty-free basis to BMJ Publishing Group Ltd ("BMJ") its licensees and where the relevant Journal is co-owned by BMJ to the co-owners of the Journal, to publish the Work in this journal and any other BMJ products and to exploit all rights, as set out in our [licence](#).

The Submitting Author accepts and understands that any supply made under these terms is made by BMJ to the Submitting Author unless you are acting as an employee on behalf of your employer or a postgraduate student of an affiliated institution which is paying any applicable article publishing charge ("APC") for Open Access articles. Where the Submitting Author wishes to make the Work available on an Open Access basis (and intends to pay the relevant APC), the terms of reuse of such Open Access shall be governed by a Creative Commons licence – details of these licences and which [Creative Commons](#) licence will apply to this Work are set out in our licence referred to above.

Other than as permitted in any relevant BMJ Author's Self Archiving Policies, I confirm this Work has not been accepted for publication elsewhere, is not being considered for publication elsewhere and does not duplicate material already published. I confirm all authors consent to publication of this Work and authorise the granting of this licence.

# 1 Low Back Pain in the Bangladeshi Adult Population: A Cross-sectional National Survey

## 2 3 *Short Running Head: Low Back Pain in Bangladesh*

4 **Authors:** Muhammad Shoaib Momen Majumder, Ferdous Hakim, Iftekhar Hussain Bandhan,  
5 Mohammad Abdur Razzaque, Ahmad Zahid-Al-Quadir, Shamim Ahmed, Minhaj Rahim  
6 Choudhury, Syed Atiqul Haq, Mohammad Mostafa Zaman

### 7 8 **Author names, highest academic degrees, appointments, Email and ORCID:**

9 Muhammad Shoaib Momen Majumder, FCPS (Medicine), MD (Rheumatology); Department of  
10 Rheumatology, Bangabandhu Sheikh Mujib Medical University (Ringgold ID 74464), Bangladesh,  
11 Email: momen.shoaib@gmail.com, ORCID ID: <https://orcid.org/0000-0002-7901-0847>;

12  
13 Ferdous Hakim, MPH (Epidemiology), Research and Publication, World Health Organization  
14 Bangladesh (Ringgold ID 215134), Email: hakimf@who.int, ORCID: <https://orcid.org/0000-0003-2376-3978>;

15  
16 Iftekhar Hussain Bandhan, MD (Rheumatology), Department of Rheumatology, Bangabandhu Sheikh  
17 Mujib Medical University (Ringgold ID 74464), Bangladesh, Email: ibandhan@gmail.com, ORCID  
18 ID: <https://orcid.org/0000-0002-3800-6155>;

19  
20 Mohammad Abdur Razzaque, MD (Rheumatology), Register, Department of Medicine, Chittagong  
21 Medical College (Ringgold ID 467859), Bangladesh, Email: rhrazzaq@gmail.com, ORCID ID:  
22 <https://orcid.org/0000-0002-2395-542X>;

23  
24 Ahmad Zahid-Al-Quadir, MD (Rheumatology), Department of Medicine, Sylhet MAG Osmani  
25 Medical College (Ringgold ID 469196), Email: drzahidssmc@gmail.com, <https://orcid.org/0000-0003-4178-6487>;

26  
27 Shamim Ahmed, FCPS (Medicine), Associate Professor of Rheumatology, Bangabandhu Sheikh  
28 Mujib Medical University (Ringgold ID 74464), Dhaka, Bangladesh, Email:  
29 dr\_shamim\_ahmed@yahoo.com;

30  
31 Minhaj Rahim Choudhury, MD, FCPS (Medicine) Professor of Rheumatology, Bangabandhu Sheikh  
32 Mujib Medical University (Ringgold ID 74464), Dhaka, Bangladesh, Email: drminhaj11@gmail.com,  
33 ORCID ID: <https://orcid.org/0000-0002-8695-5240>;

34  
35 Syed Atiqul Haq, FCPS (Medicine), MD, FRCP, Professor of Rheumatology, Bangabandhu Sheikh  
36 Mujib Medical University (Ringgold ID 74464), Dhaka, Bangladesh, Email:  
37 haqsyedatiqul@gmail.com, ORCID ID: <https://orcid.org/0000-0003-4154-7283>

38  
39 Mohammad Mostafa Zaman, PhD (Epidemiology), Advisor, Research and Publication, World Health  
40 Organization Bangladesh (Ringgold ID 215134), Email: zamanm@who.int, ORCID ID:  
41 <https://orcid.org/0000-0002-1736-1342>;

42  
43 **Counts:** Number of words (abstract): 248, number of words (body): 2850, number of  
44 references: 50, number of figures: 03, number of tables: 03

45  
46 **Name, address, email of the author responsible for correspondence:**

1  
2  
3 49 Muhammad Shoaib Momen Majumder, FCPS (Medicine), MD (Rheumatology); Department of  
4 50 Rheumatology, Bangabandhu Sheikh Mujib Medical University (Ringgold ID 74464), Bangladesh,  
5 51 Email: [momen.shoaib@gmail.com](mailto:momen.shoaib@gmail.com), ORCID ID: <https://orcid.org/0000-0002-7901-0847>  
6  
7  
8

52

## 53 **ABSTRACT**

### 54 **Objective:**

55 Low back pain (LBP) is a common musculoskeletal disorder. This study aims to determine  
56 the residence- and sex-specific prevalence and the risk factors of LBP in Bangladesh.  
57

### 58 **Methods:**

59 The study subjects (ages  $\geq 18$  years) were identified from 20 primary sampling units of the  
60 national census following a cross-sectional multi-stage stratified sampling design. We  
61 considered the mechanical type of LBP for this study. A Bangla version of the modified  
62 Community Oriented Program for Control of Rheumatic Disorders questionnaire was used. A  
63 team of trained field workers, rheumatology residents and rheumatologists collected the data.  
64

### 65 **Results:**

66 Two thousand subjects were approached, but 1843 could be screened. Among them, 561 had  
67 musculoskeletal disorders, and 343 were diagnosed with LBP. The age-adjusted prevalence  
68 of LBP was 19.4% (95% confidence interval, CI: 14.0–24.8), which was higher in women  
69 (27.2%, 19.3–35.1) than men (14.0%, 8.7–19.3). The prevalence persistently increased from  
70 age group 18–34 years (12.8%, 8.5–17.2) to  $\geq 55$  years (23.5%, 16.0–31.0). People with no  
71 education had the highest prevalence (35.0%, 25.4–44.6). The prevalences did not differ  
72 between urban and rural residential locations. Four factors were significantly associated with  
73 LBP: age (adjusted odds ratio: 2.5, 95% CI: 1.8–3.4), female sex (2.4, 1.8–3.2), absence of  
74 formal education (1.5, 1.1–1.9), and history of physical trauma (1.9, 1.3–2.8).  
75

### 76 **Conclusion:**

77 LBP is a common problem in Bangladeshi adults. The risk factors are age, female sex, no  
78 formal education, and history of physical trauma. These should be addressed adequately to  
79 prevent and treat LBP.  
80

81 **Keywords:** Low back pain, risk factors, Bangladesh, prevalence, cross-sectional survey  
82

1  
2  
3 834  
5 84 **KEY MESSAGES:**6  
7 85 **What is already known?**

- 8
- 
- 9 86
- Low back pain—a common musculoskeletal disorder—is an important cause of
- 10
- 
- 11 87 disability and work loss globally particularly for the lower middle income countries.

12 88

13  
14 89 **What does this study add?**

- 15
- 
- 16 90
- This study was the first national-level study on musculoskeletal disorders using the
- 17
- 
- 18 91 primary sampling units of the Bangladesh Bureau of Statistics

- 19
- 
- 20 92
- We report here the prevalence of low back pain in Bangladesh segregated by
- 21
- 
- 22 93 sociodemographic factors, and risk factors.

- 23
- 
- 24 94
- Four risk factors were identified for LBP: those were age, female sex, absence of
- 25
- 
- 26 95 formal education, and history of trauma

27 96

28  
29 97 **What is the impact on future clinical practice?**

- 30
- 
- 31 98
- Appropriate clinical services, health education and risk reduction strategies can
- 32
- 
- 33 99 reduce the burden of low back pain.

34 100

35 101

36 102

37 103

38 104

39 105

40 106

41 107

42 108

43 109

44 110

45 111

46 112

47

48

49

50

51

52

53

54  
55  
56  
57  
58  
59  
60

## 113 INTRODUCTION

114 Low back pain (LBP) is one of the most frequent medical problems globally. It is defined as  
115 pain, stiffness, or muscle tension localized below the costal margin and above the inferior  
116 gluteal folds<sup>1</sup>. Up to 84% of adults suffer from LBP at some point in life<sup>2</sup>. The prevalence of  
117 chronic LBP is about 23%<sup>3</sup>. Around 11–12% of the population become disabled due to LBP<sup>4</sup>.  
118 It causes substantial personal, social and financial burdens globally<sup>4</sup>. In the USA, LBP is the  
119 second most frequent cause for a physician consultation<sup>5</sup>. LBP is ranked globally as the  
120 topmost cause of disability as it affects mostly working-age people<sup>6</sup>. It accounted for 60.1  
121 million disability-adjusted life-years in 2015. There was a significant increase of LBP by  
122 54% since 1990, and the highest escalation took place in the low and middle-income  
123 countries (LMICs)<sup>7</sup>. Disability from LBP is a primary concern for the LMICs, where manual  
124 labour is common in an unconventional way. The scope for job switching is restricted in  
125 resource constraint countries.

126

127 LBP has multi-sectorial health outcomes like a lower quality of life, poorer self-reported  
128 health, depression and more workspace absenteeism<sup>8</sup>. As a result, LBP has become an  
129 important cause of sick leave and early retirement among the working population<sup>9</sup>. In the  
130 USA, approximately 149 million workdays are lost due to LBP, leading to an estimated loss  
131 of 100–200 billion US dollars per year<sup>10</sup>. Non-specific LBP is the commonest of all causes of  
132 LBP. Non-specific LBP is defined as LBP not particularly associated with severe or  
133 particular aetiology like malignancy, infection, fracture, inflammatory condition,  
134 radiculopathy or cauda equina syndrome<sup>3</sup>.

135

136 Albeit high in most studies, there is a difference in LBP prevalence in various  
137 epidemiological studies. The estimated prevalence was 84% in Canada, 70% in Denmark,  
138 59% in the UK, and 29% in Iran<sup>11</sup>. The estimated prevalence of LBP in India ranged between  
139 42 and 83%<sup>12 13</sup>. A recent cross-sectional, community-based, epidemiological study  
140 conducted in Northern India yielded an estimated lifetime prevalence of 47% in man 57% in  
141 women<sup>14</sup>. A Community Oriented Program for Control of Rheumatic Disorders (COPCORD)  
142 survey in Bangladesh published in 2005 showed 6.6%, 9.9%, and 9.2% prevalence of LBP in  
143 the rural, urban slum, and affluent urban areas, respectively<sup>15</sup>. A cross-sectional national  
144 study in Bangladesh in 2015 showed LBP was the top-ranking musculoskeletal disorder  
145 (MSD) with a prevalence of 18.6%<sup>16</sup>. This communication focuses more deeply on the

1  
2  
3 146 segregated prevalence, risk factors, disability and work loss due to LBP utilizing data  
4  
5 147 generated by the 2015 study.  
6  
7 148

## 8 149 **METHODS**

9  
10 150 A detailed description of the methodology is beyond the scope of this article and is described  
11  
12 151 elsewhere<sup>16</sup>. Adults aged 18 years or more comprised the study population through a  
13  
14 152 household level multi-stage stratified cross-sectional survey. The sampling frame was based  
15  
16 153 on the 2001 Bangladesh Census<sup>17</sup>. With a design effect of 1.5 and 85% response rate for four  
17  
18 154 reporting domains (man-woman, urban-rural), the calculated sample size was 1,978, which  
19  
20 155 was rounded to 2,000. It was stratified into seven divisions of rural (Mauza) and urban  
21  
22 156 (Mahalla) areas. Twenty (8 urban and 12 rural) primary sampling units (PSUs) were selected.  
23  
24 157 The first 100 households were consecutively included from each PSU, where even numbers  
25  
26 158 were assigned as man and odd numbers as woman households. In each household, the single  
27  
28 159 respondent was identified from a list of eligible household members with the help of a Kish  
29  
30 160 table. (**Figure 1**)  
31  
32 161

33 162 A detailed manual was prepared before the training for this survey and was used by all field  
34  
35 163 staff. All investigators and the WHO technical team coordinated and conducted the training.  
36  
37 164 The modified COPCORD questionnaire was the survey tool<sup>18</sup>. The English version of the  
38  
39 165 first part of the questionnaire was translated to Bangla, then adapted, validated, and  
40  
41 166 administered by the interviewers. Data were collected for six days from each PSU. There  
42  
43 167 were two recall visits to ensure participation. The research physician interviewed the  
44  
45 168 suspected respondents for MSDs. Opinions were taken from the division level investigator  
46  
47 169 for the doubtful cases. To validate the diagnoses, the investigators made at least one visit to  
48  
49 170 PSUs in their respective divisions.  
50  
51 171

52 172 LBP group of disorders were operationally defined as mechanical type back pain that  
53  
54 173 included non-specific LBP and lumbar spondylosis. Considering the limitation of  
55  
56 174 differentiating investigation in the field, we did not classify LBP beyond this. LBP duration  
57  
58 175 was classified into three groups: acute: up to 6 weeks, subacute: 6-12 weeks, and chronic that  
59  
60 176 persists beyond 12 weeks<sup>19</sup>. Respondents with pain in the muscles, bones, joints, or any part  
177 of the body (musculoskeletal symptom) during the preceding seven days or on pain  
178 medication with no pain were considered as positive respondents. The research physicians  
179 interviewed and thoroughly examined all 'positive' respondents. Data on physical activity



1  
2  
3 180 were calculated into metabolic equivalent tasks (MET)-minutes per week using the  
4 181 STEPwise Surveillance of noncommunicable disease risk factors (STEPS) protocol and  
5 182 divided into quartiles<sup>20</sup>. The 4<sup>th</sup> quartile was labelled as strenuous physical activity.  
6  
7  
8 183

9  
10 184 The study participants were divided into three subgroups as per age in years: 18-34, 35-54  
11 185 and 55-99. We considered ownership of household asset items (electricity, television,  
12 186 refrigerator, etc.) for constructing wealth index. In addition, the type of main material used  
13 187 for the roof of the main house (cement, tin and katcha such as bamboo/thatched/straw/gunny  
14 188 etc.) was also included in the model. A principal component analysis was used to create  
15 189 standardized factor scores for each of the items. The total scores for the respondents were  
16 190 calculated and categorised those into quartiles for description from one (lowest household  
17 191 wealth) to four (highest household wealth)<sup>16</sup>.  
18  
19  
20  
21  
22  
23

24 192  
25 193 A validated Bangla version of the Bangla Health Assessment Questionnaire - Disability Index  
26 194 (HAQ-DI) was used for the disability score. For determining work loss, the recall period was  
27 195 12 months<sup>21</sup>. Diabetes was defined as random blood glucose  $\geq 11.1$  mmol/l or the use of anti-  
28 196 diabetic medications. Obesity was defined as a body mass index of  $\geq 25$  kg/m<sup>2</sup><sup>22</sup>. Abdominal  
29 197 obesity was defined if the waist circumference  $\geq 90$  cm in man,  $\geq 80$  cm in the woman<sup>23</sup>.  
30  
31  
32  
33

34 198

### 35 199 **Statistical analysis:**

36 200 The survey data were entered in and cleaned using Microsoft Excel. However, statistical  
37 201 analysis was done using Epi Info Version 7.1.5.2. Continuous variables were categorised  
38 202 before analysis as appropriate. We estimated the prevalence of LBP with 95% confidence  
39 203 intervals. The prevalence was segregated by residence (urban/ rural) and sex (man/ woman).  
40 204 Nonparametric test (Kruskal-Wallis H test) were used to analyse data that were not normally  
41 205 distributed. Whenever we encountered an unweighted respondent size of less than 25, the  
42 206 confidence intervals were suppressed. Age adjustment of prevalence estimates was made  
43 207 based on the WHO World Population 2000-2025<sup>24</sup>. Factors were checked for association with  
44 208 LBP by comparing LBP with no MSD through 2x2 tables. Univariate logistic regression  
45 209 analysis was done to obtain unadjusted odds ratios. All statistically significant relationships  
46 210 ( $P < 0.05$ ) were entered into a model for logistic regression analysis. The adjusted odds ratios  
47 211 and their 95% confidence limits were calculated to identify the strength of association of LBP  
48 212 factors. A detailed description of categorisation and analysis of other variables was described  
49 213 elsewhere<sup>16</sup>.  
50  
51  
52  
53  
54  
55  
56  
57  
58  
59  
60

214

**215 Ethics Approval and Consent to Participate:**

216 Ethical guidelines, as outlined by the Declaration of Helsinki, were followed throughout the  
217 study<sup>25</sup>. Ethical clearance was obtained from the Institutional Review Board of Bangabandhu  
218 Sheikh Mujib Medical University (ID 1100). Consent was obtained from the respondents in  
219 Bangla as per Institutional Review Board's guidelines.

220

**221 Patient and Public Involvement:**

222 Patient or the public were not involved in the design, or conduct, or reporting, or  
223 dissemination plans of this study.

224

**225 RESULTS****226 Characteristics of respondents:**

227 In this nationally representative study, 2,000 adults 18 years or older were approached, and  
228 1,843 (92.2%) agreed to participate<sup>16</sup>. The mean age of the participants was 40.5 (standard  
229 deviation 14.7) years, and 51.6% were women. A total of 561 (30.4%) had some type of  
230 MSDs. LBP was the most common among MSDs (18.6%, unadjusted), followed by knee  
231 osteoarthritis (7.3%) and soft-tissue rheumatism (5.2%). Among the inflammatory rheumatic  
232 diseases, the common conditions were rheumatoid arthritis (1.6%) and spondyloarthritis  
233 (1.3%).

234

**235 Characteristics of respondents with LBP:****236 Background characteristics:**

237 Among the LBP respondents (n=343), 63.3% were women, and 65.3% were from rural areas.  
238 Mean age in years (standard deviation) was 44.2 (13.8) overall, and 48.8 (13.0) in men and  
239 41.6 (13.6) in women. The study participants were divided into three subgroups as per age,  
240 and the highest number of LBP was observed in the 35–54 age group (n=168). More than half  
241 (52.2%, n=180) were homemakers (all women), while the rest constituted other occupations  
242 like laborer, business professional, service holder and others. Almost half of the participants  
243 with LBP had no formal education (n=150, 43.7%). Overall, according to the wealth index,  
244 30.0% of respondents belonged to the 1<sup>st</sup> quartile (lowest socioeconomic status). Above one  
245 third (36.4%) of the respondents with LBP had additional concomitant MSDs. About one-  
246 fourth (23.0%) were overweight and 31.5% had abdominal obesity. (**Table 1**)  
247 26.6 (20.1–33.1)

248

**249 Prevalence:**

250 We report here (**Table 2**) the age-adjusted prevalence of LBP to be 19.4% (95% CI: 14.0–  
251 24.8), which is significantly higher in women (23.5%, 16.0–31.0) than men (14.0%, 8.7–  
252 19.3). There has been a persistent increase in prevalence from 12.8% (95% CI 8.5–17.1) in  
253 18–34 years age group to 23.5% (95% CI 16.0–31.0) in 55–99 years age group. This trend  
254 was more prominent in women. The prevalence did not vary significantly among  
255 occupational groups. People with no formal education had significantly highest prevalence  
256 of LBP (26.6%, 20.1–33.1) compared to other educational groups. Although the highest  
257 prevalence (21.6%) was observed in the 1st quartile of the wealth index, it did not vary  
258 significantly. LBP was not significantly associated with strenuous physical activity in our  
259 sample. We checked LBP prevalence by urban (16.6%, 11.6–21.6) and rural (19.9%, 12.6–  
260 27.1) categories, but it did not differ significantly. Among the co-morbidities, the prevalence  
261 of LBP was higher among patients of hypertension (23.9%) and obesity (20.6%). The  
262 highest prevalence of LBP (81.7%, 74.1–89.3) was seen in 153 respondents who had multiple  
263 (two or more) MSDs. (**Figure 2**)

264

**265 Disability and work loss:**

266 The distribution of Bengali HAQ-DI scores was not normally distributed among the LBP  
267 patients. The scores ranged from 0–2.6. The LBP group's median (interquartile range) was  
268 0.6 (0.3–0.9). The difference of Bangla HAQ-DI score between LBP (n=343) and no MSD  
269 (n=60) is statistically significant ( $P<0.0001$ ) by the Kruskal-Wallis H test, indicating that  
270 LBP is associated with a higher disability. The distribution of days lost from work for LBP  
271 group had a highly skewed distribution and ranged from 0–365 days. However, the difference  
272 of days lost from work (n=1,625) between LBP (n=343) and no MSD (n=1,282) is  
273 statistically significant ( $P<0.0001$ ) by the Kruskal-Wallis H test, indicating that LBP is  
274 associated with more days lost. (**Figure 3**)

275

**276 Risk factors:**

277 Univariate logistic regression analysis did not observe any significant association of  
278 occupation, wealth indices, tobacco use, obesity, and diabetes (**Table 3**). A significant  
279 association was observed for age groups 35–54 and 55–99 years, female sex, lack of  
280 education, history of physical trauma, and hypertension according to the unadjusted odds  
281 ratio and their 95% confidence intervals ( $P<0.001$ ). These significant associations persisted in

1  
2  
3 282 the multiple logistic regression analysis having all these variables into the model  
4  
5 283 simultaneously ( $P<0.001$ ) except for hypertension.

6 284

7  
8 285

9  
10 286

## 11 287 **DISCUSSION**

12  
13 288 LBP is a common medical problem with very high personal and societal impact, leading to  
14  
15 289 poor quality of life and workability<sup>26</sup>. This survey was the first national study with a  
16  
17 290 representative sample where we report that one in five adults in Bangladesh suffers from  
18  
19 291 LBP. The prevalence in Bangladesh is similar to Kuwait (22.7%)<sup>27</sup> and Qatar (23.3%)<sup>28</sup> but  
20  
21 292 lower than northern India (32%)<sup>29</sup> and Iran (29.3%)<sup>11</sup>. Malaysia (11.6%)<sup>30</sup> has a lower  
22  
23 293 prevalence of LBP than we report here. A systematic review of 165 studies from 54 countries  
24  
25 294 revealed the global prevalence of LBP of 12-33%<sup>4</sup>. According to the systematic analysis of  
26  
27 295 the Global Burden of Disease Study 2017, LBP was the leading cause of YLDs (years lived  
28  
29 296 with disability)<sup>31</sup>. In our study, the rural people had a higher prevalence of LBP than the  
30  
31 297 urban people. This difference—though not statistically significant—was probably due to lower  
32  
33 298 doctor concentration in the rural areas, financial limitations, and less education status.  
34  
35 299 However, regional variation was observed in other studies<sup>11</sup>.

36 300

37  
38 301 Age was a risk factor for LBP in this study. The prevalence of LBP persistently increased  
39  
40 302 with age but this was not statistically significant. However an analysis reported that the risk  
41  
42 303 and prevalence of low back pain increased with age<sup>5</sup>. A systematic review of the global  
43  
44 304 prevalence of LBP revealed the association of age was highest in the 40-49 age group<sup>4 32</sup>. The  
45  
46 305 overall prevalence rises with age 65, which gradually reduces thereafter<sup>33</sup>. Some possible  
47  
48 306 explanations are LBP characteristics in older adults that differ from the middle-aged  
49  
50 307 population (less intense back pain, more leg pain, and more depression)<sup>34</sup>. Our study showed  
51  
52 308 a higher prevalence of LBP among women than men, consistent with some other analyses.  
53  
54 309 This could be due to more household or domestic activities among women compared to men.  
55  
56 310 This finding agrees with the results from the national health survey on the Iranian  
57  
58 311 population<sup>11</sup>. Some studies and systematic reviews demonstrated a higher incidence of LBP  
59  
60 312 in women than men<sup>4 32</sup>. Edward *et al.* 2018 found no significant difference in age and sex  
313 scores in their study<sup>35</sup>. Higher women prevalence can be partially explained that they have a  
314 lower pain threshold than men<sup>36</sup>. The sex differences may be implied with gonadal steroid  
315 hormones like estradiol and testosterone that modulate sensitivity to pain and analgesia<sup>37</sup>.

1  
2  
3 316 Women always experienced a higher frequency of visceral pain (e.g., during menstruation,  
4 317 pregnancy) than men<sup>38</sup>. It seems that in painful conditions, women exhibit a greater  
5 318 prevalence than men as women report more pain<sup>39</sup>.  
6  
7 319  
8  
9 320 Leboeuf-Yde considered body weight as a possible weak indicator for LBP in his systematic  
10 321 literature review due to lack of evidence<sup>40</sup>. The results obtained in our study did not  
11 322 demonstrate a statistically significant association between LBP and higher BMI. Some other  
12 323 studies found obesity or high BMI associated with increased risk LBP development and  
13 324 severity<sup>11 41</sup>. In our research, we found that the absence of formal education is significantly  
14 325 associated with LBP. A cross-sectional study in the United States found that LBP is more  
15 326 common in people who have had less than high school education<sup>42</sup>. Other studies in the USA,  
16 327 UK, and Iran found lower educational status had an increased association with LBP and  
17 328 found higher education inversely associated with LBP<sup>11 43</sup>. Several proposed mechanisms  
18 329 may account for the relationship between low academic status and back pain. The amount of  
19 330 formal education contributes to the types of jobs that an individual may involve in, and  
20 331 subsequently, the types of jobs influence LBP<sup>44</sup>. Moreover, health education regarding  
21 332 posture management, lifestyle changes, physical exercises, stress management poorly reached  
22 333 among people with an absence of formal education. We didn't find any significant association  
23 334 of LBP with occupation. In a US-based study, LBP was significantly related to occupational  
24 335 factors such as truck driving, lifting, carrying, pulling, pushing, twisting, and non-driving  
25 336 vibrational exposure<sup>45</sup>. In some European countries, workers involved in heavy weightlifting  
26 337 ( $\geq 25$  kg) suffered more from LBP<sup>46</sup>.  
27 338  
28  
29 339 Studies reported associations between LBP and lower social class<sup>11 42</sup> but we did not find any  
30 340 significant association of LBP with economic status. In our analysis, we found there was a  
31 341 significant positive relation between LBP with trauma. Chronic pain following trauma is  
32 342 possible after physical injury. Persistence back pain was more associated with psychological  
33 343 factors like stress, low education status, etc., than the physical injury itself<sup>47</sup>. Lack of formal  
34 344 education was a significant association in this study which may contribute to this factor. LBP  
35 345 may cause inactivity and lack of exercise resulting in weight gain, subsequently creating or  
36 346 exaggerating co-morbid conditions like hypertension and diabetes mellitus<sup>48</sup>. We found no  
37 347 relationship between hypertension and LBP. In a Korean survey, the lifetime prevalence of  
38 348 LBP was 34.4% among the hypertensive respondents, but the adjusted OR of LBP prevalence  
39  
40  
41  
42  
43  
44  
45  
46  
47  
48  
49  
50  
51  
52  
53  
54  
55  
56  
57  
58  
59  
60

1  
2  
3 349 was significantly lower than the normotensive subjects (fully adjusted 0.79, 95% CI 0.70-  
4 350 0.90)<sup>49</sup>. There was no association between diabetes and LBP in this study.

5  
6 351

7  
8 352

9  
10 353

### 11 354 **Strengths and Limitations**

12 355 This is the first nationally representative survey on LBP in Bangladesh, and probably, among  
13 356 all south Asian nations. The field team included rheumatology residents to make valid  
14 357 diagnoses. Most diagnoses were double-checked in the field by the investigators, who are  
15 358 experienced rheumatologists themselves<sup>16</sup>. Despite the fact that their involvement in the field  
16 359 operation, some diagnoses of evolving rheumatological conditions may suffer from sufficient  
17 360 validity because of a lack of adequate quality imaging facilities in rural areas. The sample  
18 361 size calculation of our study was based on combined MSD prevalence<sup>16</sup>. Therefore, a  
19 362 cautious interpretation of the results is necessary because of inadequate sample size,  
20 363 especially when split into reporting domains.

21  
22 364

### 23 365 **CONCLUSION**

24 366 This nationally representative study is the first to report the prevalence of LBP by  
25 367 sociodemographic background, comorbidities and risk factors in Bangladesh. One in five  
26 368 adults suffer from LBP. Education and trauma are modifiable risk factors that warrant  
27 369 intervention. These can be addressed through appropriate health education and clinical  
28 370 services.

29  
30 371  
31  
32  
33  
34  
35  
36  
37  
38  
39  
40  
41  
42  
43  
44  
45  
46  
47  
48  
49  
50  
51  
52  
53  
54  
55  
56  
57  
58  
59  
60

1  
2  
3 **372 Abbreviations and acronyms:**  
4

---

|           |                                                               |
|-----------|---------------------------------------------------------------|
| 5 BMI     | Body mass index                                               |
| 6 BSMMU   | Bangabandhu Sheikh Mujib Medical University                   |
| 7 CI      | Confidence interval                                           |
| 8 COPCORD | Community oriented program from control of rheumatic diseases |
| 9 HAQ-DI  | Health Assessment Questionnaire - Disability Index            |
| 10 LBP    | Low back pain                                                 |
| 11 MSK    | Musculoskeletal                                               |
| 12 MSD    | Musculoskeletal disorder                                      |
| 13 OR     | Odds ratio                                                    |
| 14 PPS    | Population proportion to size                                 |
| 15 PSU    | Primary sampling unit                                         |
| 16 WHO    | World health organisation                                     |

---

17  
18  
19  
20  
21  
22  
23  
24  
25  
26  
27 **373**

28 **374 Acknowledgement:** We gratefully acknowledge the field team, divisional coordinators, civil  
29 surgeons, upazila health and family planning officers and health assistants for their support.  
30  
31 **375**

32  
33 **376**

34 **377 Author contribution:**

35 **378** Muhammad Shoaib Momen Majumder (MSMM): Conceptualised the area of work, and  
36 prepared the first draft of the manuscript and revised the subsequent drafts.  
37  
38 **379**

39 **380** Ferdous Hakim (FH): analysed the data, guided preparation of graphs and tables, interpreted  
40 the results, revised the draft manuscript, and coordinated the writing exercise.  
41  
42 **381**

43 **382** Iftexhar Hussain Bandhan (IHB): prepared graphs and tables, revised the draft manuscript.

44 **383** Mohammad Abdur Razzaque (MAR): reviewed the manuscript and with special reference to  
45 the literature review.  
46  
47 **384**

48 **385** Ahmed Zahid-Al-Quadir and Shamim Ahmed: Prepared the training manual, trained the field  
49 team, executed the field operation in coordination with the divisional investigators;  
50  
51 **386**

52 **387** Minhaj R Choudhury, Syed Atiqul Haq and Mohammad Mostafa Zaman: Designed the study,  
53 guided the analysis and manuscript writing, critically reviewed the results and manuscript  
54 drafts, ensured integrity of data.  
55  
56 **389**

57 **390** All authors: Approved publication.  
58  
59  
60

1  
2  
3 391 **Funding:** Preparing this manuscript did not require any funding. However, the base study  
4  
5 392 was supported by the World Health Organization, Bangladesh (Agreement Reference:  
6  
7 393 SEBAN140895) back in 2015. As a part of its mandate to strengthen national research  
8  
9 394 capacity, WHO provided technical guidance in designing, implementing, analysing data, and  
10  
11 395 writing the report. However, it does not have any influence on the results.  
12

13 396  
14 397 **Consent to publish:** All authors contributed to the manuscript and provided consent to  
15  
16 398 publish.  
17

18 399  
19 400 **Availability of data and materials:** The dataset used for this manuscript is available with  
20  
21 401 the corresponding author upon reasonable request.  
22

23 402  
24 403 **Disclosure of Conflicts of Interest:** None of the authors has any conflict of interest to  
25  
26 404 disclose. The authors alone are responsible for their views expressed in this article, which do  
27  
28 405 not necessarily represent the institutions' views, decisions, or policies with which they are  
29  
30 406 affiliated.  
31

32 407  
33 408 **Ethical Publication Statement:** We confirm that we have read the Journal's position on  
34  
35 409 issues involved in ethical publication and affirm that this report is consistent with those  
36  
37 410 guidelines.  
38

39 411  
40  
41  
42  
43  
44  
45  
46  
47  
48  
49  
50  
51  
52  
53  
54  
55  
56  
57  
58  
59  
60



## 412 Tables

**Table 1. Socioeconomic characteristics of patients of low back pain in Bangladesh, musculoskeletal disease survey 2015. (n=343)**

| Sociodemographic characteristics                    | Total<br>(n=343)* | Man<br>(n=126)   | Woman<br>(n=217) |
|-----------------------------------------------------|-------------------|------------------|------------------|
|                                                     | Number (percent)  | Number (percent) |                  |
| Age in years, mean (standard deviation)             | 44.2 (13.8)       | 48.8 (13.0)      | 41.6 (13.6)      |
| 18-34                                               | 91 (26.5)         | 14 (11.1)        | 77 (35.5)        |
| 35-54                                               | 168 (49.0)        | 70 (55.6)        | 98 (45.2)        |
| 55-99                                               | 84 (24.5)         | 42 (33.3)        | 42 (19.4)        |
| Occupation                                          |                   |                  |                  |
| Homemaker                                           | 180 (52.5)        | 0 (0.0)          | 180 (82.9)       |
| Laborer†                                            | 83 (24.2)         | 75 (59.5)        | 8 (3.7)          |
| Business professional                               | 22 (6.4)          | 22 (17.5)        | 0 (0.0)          |
| Service holder                                      | 11 (3.2)          | 7 (5.6)          | 4 (1.8)          |
| Others‡                                             | 47 (13.7)         | 22 (17.5)        | 25 (11.5)        |
| Education                                           |                   |                  |                  |
| No formal education (0)                             | 150 (43.7)        | 46 (36.5)        | 104 (47.9)       |
| Any primary education (1-5)                         | 71 (20.7)         | 33 (26.2)        | 38 (17.5)        |
| Any secondary education (6-10)                      | 97 (28.3)         | 38 (30.2)        | 59 (27.2)        |
| Above secondary (≥11 years)                         | 25 (7.3)          | 9 (7.1)          | 16 (7.4)         |
| Married‡                                            | 334 (97.4)        | 123 (97.6)       | 211 (97.2)       |
| Wealth index quartile§                              |                   |                  |                  |
| 1st                                                 | 103 (30.0)        | 38 (30.2)        | 65 (30.0)        |
| 2nd                                                 | 92 (26.8)         | 34 (27.0)        | 58 (26.7)        |
| 3rd                                                 | 71 (20.7)         | 26 (20.6)        | 45 (20.7)        |
| 4th                                                 | 77 (22.5)         | 28 (22.2)        | 49 (22.6)        |
| Rural residence                                     | 224 (65.3)        | 87 (69.0)        | 137 (63.1)       |
| Duration of low back pain >3 months                 | 253 (76.2)        | 103 (83.9)       | 149 (71.6)       |
| Overweight (body mass index ≥25 Kg/m <sup>2</sup> ) | 79 (23.0)         | 16 (12.7)        | 63 (29.0)        |
| History of physical trauma                          | 48 (14.0)         | 23 (18.3)        | 25 (11.5)        |
| Current tobacco use                                 | 172 (50.1)        | 92 (73.0)        | 80 (36.9)        |
| Concomitant musculoskeletal disorders <sup>l</sup>  | 125 (36.4)        | 41 (32.5)        | 84 (38.7)        |
| Hypertension <sup>¶</sup>                           | 65 (19.0)         | 19 (15.1)        | 46 (21.2)        |
| Diabetes mellitus <sup>**</sup>                     | 18 (5.2)          | 2 (1.6)          | 16 (7.4)         |
| Strenuous physical activity <sup>††</sup>           | 51 (14.9)         | 49 (38.9)        | 2 (0.9)          |

\* All values are number (percent) unless stated otherwise.

† Labourer includes: farmer, daily worker, rickshaw puller, garments worker, field worker and others. Other occupations: retired, weaver and housekeeper etc.

‡ Includes currently married, divorced, separated and widowed.

§ The wealth index was constructed using principal component analysis out of a list of 19 items (see Methods section for details);

<sup>l</sup> 125 respondents suffered from low back pain had either additional 1, 2 or 3 musculoskeletal disorders such as, knee osteoarthritis, soft tissue rheumatism, non-inflammatory musculoskeletal disorders, cervical spondylosis etc.

<sup>¶</sup> Hypertension was defined as systolic blood pressure ≥140 or diastolic blood pressure ≥90 or medication for hypertension;

<sup>\*\*</sup> Diabetes was defined as random capillary glucose level ≥11.1 or medication for diabetes;

<sup>††</sup> Fourth quartile of the MET-minutes distribution of work-related physical activity. Commutation and leisure time physical activities were not considered because these were negligible contributors

413

414

**Table 2. Prevalence of low back pain by sociodemographic characteristics in Bangladesh, musculoskeletal disease survey 2015 (n=1843)**

| Sociodemographic characteristics         | Total (n=1843) |                  | Man (n=892)      | Woman (n=951)    |
|------------------------------------------|----------------|------------------|------------------|------------------|
|                                          | Number         | Percent (95% CI) | Percent (95% CI) |                  |
| Overall                                  | 343            | 18.6 (13.7–23.5) | 14.1 (9.2–19.1)  | 22.8 (17.1–28.6) |
| Overall (age adjusted)*                  | -              | 19.4 (14.0–24.8) | 14.0 (8.7–19.3)  | 27.2 (19.3–35.1) |
| Age in years                             |                |                  |                  |                  |
| 18-34                                    | 711            | 12.8 (8.5–17.1)  | 6.5 (3.6–9.3)    | 15.6 (10.0–21.1) |
| 35-54                                    | 774            | 21.7 (16.2–27.2) | 16.6 (10.3–22.9) | 27.8 (21.1–34.6) |
| 55-99                                    | 358            | 23.5 (16.0–31.0) | 16.6 (8.3–24.9)  | 40.0 (27.0–53.0) |
| Occupation                               |                |                  |                  |                  |
| Homemaker                                | 749            | 24.0 (18.1–30.0) | 0.0 (–)          | 24.0 (18.1–30.0) |
| Laborer†                                 | 472            | 17.6 (10.5–24.6) | 17.2 (9.8–24.6)  | 17.6 (10.5–24.6) |
| Business professional                    | 186            | 11.8 (6.4–17.3)  | 12.2 (6.6–17.7)  | 0.0 (–)          |
| Service holder                           | 135            | 8.1 (1.5–14.8)   | 6.5 (0.5–12.5)   | 14.8 (–)         |
| Others‡                                  | 301            | 15.6 (8.6–22.7)  | 13.3 (7.0–19.5)  | 18.5 (8.6–28.4)  |
| Education                                |                |                  |                  |                  |
| No formal education (0)                  | 564            | 26.6 (20.1–33.1) | 17.2 (11.0–23.5) | 35.0 (25.4–44.6) |
| Any primary education (1-5)              | 456            | 15.6 (9.4–21.8)  | 14.2 (6.9–21.4)  | 17.0 (8.8–25.3)  |
| Any secondary education (6-10)           | 538            | 18.0 (12.1–24.0) | 15.4 (7.6–23.2)  | 20.2 (13.8–26.6) |
| Above secondary (≥11 years)              | 285            | 8.8 (5.4–12.2)   | 6.2 (0.2–12.2)   | 11.5 (6.7–16.3)  |
| Married‡                                 | 334            | 19.3 (14.2–24.3) | 14.7 (9.5–19.9)  | 23.5 (17.5–29.5) |
| Wealth index quartile§                   |                |                  |                  |                  |
| 1st                                      | 476            | 21.6 (14.5–28.8) | 18.4 (11.7–25.2) | 24.1 (14.5–33.6) |
| 2nd                                      | 462            | 19.9 (11.4–28.4) | 15.5 (6.4–24.5)  | 24.0 (14.5–33.5) |
| 3rd                                      | 448            | 15.8 (10.8–20.9) | 11.3 (6.0–16.5)  | 20.7 (13.3–28.2) |
| 4th                                      | 457            | 16.8 (11.6–22.1) | 11.9 (6.5–17.3)  | 22.1 (15.6–28.5) |
| Residence                                |                |                  |                  |                  |
| Urban                                    | 716            | 16.6 (11.6–21.6) | 11.3 (7.4–15.2)  | 21.6 (13.4–29.7) |
| Rural                                    | 1127           | 19.9 (12.6–27.1) | 15.9 (8.4–23.4)  | 19.9 (12.6–27.1) |
| Strenuous physical activity <sup>l</sup> | 51             | 14.4 (7.9–20.9)  | 14.6 (7.4–21.4)  | 11.1 (–)         |
| History of physical trauma               | 178            | 27.0 (19.5–24.4) | 26 (15.9–36.4)   | 27.8 (15.4–40.2) |
| Current tobacco use                      | 172            | 19.1 (14.1–23.9) | 15 (9.9–20.1)    | 27.9 (20.0–35.8) |

95% CI: 95% confidence interval

All values are number (percent) unless stated otherwise.

\* Adjusted for WHO World Population 2000-2020.

† Labourer includes: farmer, daily worker, rickshaw puller, garments worker, field worker and others.

Other occupations: retired, weaver and housekeeper

‡ Includes currently married, divorced, separated and widowed.

§ The wealth index was constructed using principal component analysis out of a list of 20 household assets (see Methods section for details);

<sup>l</sup> Fourth quartile of the MET-minutes distribution of work-related physical activity. Commutation and leisure time physical activities were not considered because these were negligible contributors.

– 95% confidence interval not reported due number of respondents &lt;25.

415

416

**Table 3: Odds ratios of risk factors for low back pain in Bangladeshi adults, musculoskeletal disease survey 2015**

| Factors                                                                    | Odds ratio (95% confidence interval) |                 |
|----------------------------------------------------------------------------|--------------------------------------|-----------------|
|                                                                            | Unadjusted                           | Adjusted        |
| Age group, years<br>(35–99=1, 18–34=0)                                     | 2.2 (1.7–2.9)**                      | 2.5 (1.8–3.4)** |
| Sex<br>(woman=1, man=0)                                                    | 1.9 (1.5–2.4)**                      | 2.4 (1.8–3.2)** |
| Labourer†<br>(yes=1, no=0)                                                 | 0.9 (0.7–1.1)                        | -               |
| No formal education<br>(yes=1, no=0)                                       | 1.9 (1.5–2.5)**                      | 1.5 (1.1–1.9)*  |
| Low wealth index<br>(yes=1, no=0)                                          | 1.3 (1.0–1.6)                        | -               |
| Strenuous physical activity‡<br>(yes=1, no=0)                              | 0.7 (0.5–0.9)*                       | 1.0 (0.7–1.4)   |
| Overweight (body mass index $\geq 25$ Kg/m <sup>2</sup> )<br>(yes=1, no=0) | 1.3 (1.0–1.7)                        | -               |
| History of physical trauma<br>(yes=1, no=0)                                | 1.9 (1.3–2.7)**                      | 1.9 (1.3–2.8)*  |
| Current tobacco user<br>(yes=1, no=0)                                      | 1.1 (0.9–1.4)                        | -               |
| Hypertension<br>(yes=1, no=0)                                              | 1.7 (1.3–2.4)**                      | 1.4 (1.0–1.9)   |
| Diabetes mellitus<br>(yes=1, no=0)                                         | 1.1 (0.6–1.9)                        | -               |

LBP: low back pain; MSD: musculoskeletal disorder

\*  $P < 0.05$

\*\*  $P < 0.001$

† Labourer includes: farmer, daily worker, rickshaw puller, garments worker, field worker and others.

‡ Fourth quartile of the MET-minutes distribution of work-related physical activity. Commutation and leisure time physical activities were not considered because these were negligible contributors.

417

1  
2  
3 418 **Figures**  
4

5 419 **Fig. 1 Flow chart on the selection of low back pain patients from the national survey on**  
6 **musculoskeletal conditions in Bangladesh (2015) adapted from Ahmad Zahid-Al-**  
7 **Quadir *et al*<sup>21</sup>**  
8

9 422

10 423 \* Eight divisions from Sept 2015. Randomly 15 districts were selected out of 64.

11 424 \*\* PPS indicates population proportion to size.

12 425 \*\*\* Out-migration, broken house, locked house, no tenant, out of home, refusal. Two recall visits were done if  
13 426 the selected house was locked and the person chosen was not available at home at the time of the interviewer's  
14 427 visit. In case of non-participation after the second recall visit, the targeted household/individual was declared  
15 428 non-respondents.

16 429

17 430

18 431

19 432

20 433  
21  
22  
23  
24  
25  
26  
27  
28  
29  
30  
31  
32  
33  
34  
35  
36  
37  
38  
39  
40  
41  
42  
43  
44  
45  
46  
47  
48  
49  
50  
51  
52  
53  
54  
55  
56  
57  
58  
59  
60

1  
2  
3 **434 Fig. 2 Prevalence of LBP in different (Unadjusted overall prevalence (percent, 95%**  
4 **confidence interval) of low back pain and in) associated co-conditions (n=343)**  
5 **435**

6 **436**

7 **437** \*Diabetes was defined as random capillary glucose level  $\geq 11.1$  or medication for diabetes

8 **438** †Overweight is defined as body mass index  $\geq 25$  Kg/m<sup>2</sup>;

9 **439** ‡Hypertension was defined as systolic blood pressure  $\geq 140$  or diastolic blood pressure  $\geq 90$  or medication for  
10 **440** hypertension;

11 **441** §Respondents with multiple MSDs suffered from LBP, knee osteoarthritis, soft tissue rheumatism, non-  
12 **442** inflammatory musculoskeletal disorders, cervical spondylosis etc.

13 **443**

14 **444**

15  
16  
17  
18  
19  
20  
21  
22  
23  
24  
25  
26  
27  
28  
29  
30  
31  
32  
33  
34  
35  
36  
37  
38  
39  
40  
41  
42  
43  
44  
45  
46  
47  
48  
49  
50  
51  
52  
53  
54  
55  
56  
57  
58  
59  
60

For peer review only

1  
2  
3 445 **Fig. 3 Health assessment questionnaire – disability index (HAQ-DI) scores (A) and days**  
4 446 **lost from work (B) in low back pain (LBP) and no musculoskeletal disorder (MSD)**  
5 447 **groups.**

6  
7 448

8  
9 449 \* Kruskal-Wallis H test  
10  
11  
12  
13  
14  
15  
16  
17  
18  
19  
20  
21  
22  
23  
24  
25  
26  
27  
28  
29  
30  
31  
32  
33  
34  
35  
36  
37  
38  
39  
40  
41  
42  
43  
44  
45  
46  
47  
48  
49  
50  
51  
52  
53  
54  
55  
56  
57  
58  
59  
60

For peer review only

450 **References**

- 1  
2  
3  
4  
5  
6  
7  
8  
9  
10  
11  
12  
13  
14  
15  
16  
17  
18  
19  
20  
21  
22  
23  
24  
25  
26  
27  
28  
29  
30  
31  
32  
33  
34  
35  
36  
37  
38  
39  
40  
41  
42  
43  
44  
45  
46  
47  
48  
49  
50  
51  
52  
53  
54  
55  
56  
57  
58  
59  
60
- <sup>1</sup> Dionne CE, Dunn KM, Croft PR, et al. A consensus approach toward the standardization of back pain definitions for use in prevalence studies. *Spine (Phila Pa 1976)*. 2008 Jan 1;33(1):95-103. doi: 10.1097/BRS.0b013e31815e7f94.
- <sup>2</sup> Deyo RA, Tsui-Wu YJ. Descriptive epidemiology of low-back pain and its related medical care in the United States. *Spine (Phila Pa 1976)*. 1987 Apr;12(3):264-8. doi: 10.1097/00007632-198704000-00013.
- <sup>3</sup> Balagué F, Mannion AF, Pellisé F, et al. Non-specific low back pain. *Lancet*. 2012 Feb 4;379(9814):482-91. doi: 10.1016/S0140-6736(11)60610-7.
- <sup>4</sup> Hoy D, Bain C, Williams G, et al. A systematic review of the global prevalence of low back pain. *Arthritis Rheum*. 2012 Jun;64(6):2028-37. doi: 10.1002/art.34347.
- <sup>5</sup> Andersson GB. Epidemiological features of chronic low-back pain. *Lancet*. 1999 Aug 14;354(9178):581-5. doi: 10.1016/S0140-6736(99)01312-4.
- <sup>6</sup> Fatoye F, Gebrye T, Odeyemi I. Real-world incidence and prevalence of low back pain using routinely collected data. *Rheumatol Int*. 2019 Apr;39(4):619-626. doi: 10.1007/s00296-019-04273-0.
- <sup>7</sup> Hartvigsen J, Hancock MJ, Kongsted A, et al. Lancet Low Back Pain Series Working Group. What low back pain is and why we need to pay attention. *Lancet*. 2018 Jun 9;391(10137):2356-2367. doi: 10.1016/S0140-6736(18)30480-X.
- <sup>8</sup> Parreira P, Maher CG, Steffens D, et al. Risk factors for low back pain and sciatica: an umbrella review. *Spine J*. 2018 Sep;18(9):1715-1721. doi: 10.1016/j.spinee.2018.05.018.
- <sup>9</sup> Lötters F, Burdorf A. Prognostic factors for duration of sickness absence due to musculoskeletal disorders. *The Clinical Journal of Pain*. 2006 Feb;22(2):212-221. DOI: 10.1097/01.ajp.0000154047.30155.72.
- <sup>10</sup> Guo HR, Tanaka S, Halperin WE, et al. Back pain prevalence in US industry and estimates of lost workdays. *Am J Public Health*. 1999 Jul;89(7):1029-35. doi: 10.2105/ajph.89.7.1029.

- 1  
2  
3  
4  
5  
6  
7  
8  
9  
10  
11  
12  
13  
14  
15  
16  
17  
18  
19  
20  
21  
22  
23  
24  
25  
26  
27  
28  
29  
30  
31  
32  
33  
34  
35  
36  
37  
38  
39  
40  
41  
42  
43  
44  
45  
46  
47  
48  
49  
50  
51  
52  
53  
54  
55  
56  
57  
58  
59  
60
- 
- <sup>11</sup> Biglarian A, Seifi B, Bakhshi E, et al. Low back pain prevalence and associated factors in Iranian population: findings from the national health survey. *Pain Res Treat*. 2012;2012:653060. doi: 10.1155/2012/653060.
- <sup>12</sup> Gupta G, Nandini N. Prevalence of low back pain in non working rural housewives of Kanpur, India. *Int J Occup Med Environ Health*. 2015;28(2):313-20. doi: 10.13075/ijomeh.1896.00299.
- <sup>13</sup> Ahdhi GS, Subramanian R, Saya GK, et al. Prevalence of low back pain and its relation to quality of life and disability among women in rural areas of Puducherry, India. *Indian J Pain* [serial online] 2016 [cited 2021 Apr 18];30:111-5. Available from: <https://www.indianjpain.org/text.asp?2016/30/2/111/186467>.
- <sup>14</sup> Bansal D, Asrar MM, Ghai B, et al. Prevalence and Impact of Low Back Pain in a Community-Based Population in Northern India. *Pain Physician*. 2020;23(4):E389-E98.
- <sup>15</sup> Haq SA, Darmawan J, Islam MN, et al. Prevalence of rheumatic diseases and associated outcomes in rural and urban communities in Bangladesh: a COPCORD study. *J Rheumatol*. 2005 Feb;32(2):348-53. PMID: 15693098.
- <sup>16</sup> Zahid-Al-Quadir, A., Zaman, M.M., Ahmed, S. et al. Prevalence of musculoskeletal conditions and related disabilities in Bangladeshi adults: a cross-sectional national survey. *BMC Rheumatol* 4, 69 (2020). <https://doi.org/10.1186/s41927-020-00169-w>
- <sup>17</sup> Bangladesh Bureau of Statistics. Population and housing census 2011, preliminary result. Dhaka: Bangladesh Bureau of Statistics; 2001. Accessed 20 Apr 2020. <http://bbs.portal.gov.bd>.
- <sup>18</sup> Islam, ME, Ahmed, S, Shahin, MA, et al. Cross-cultural adaptation and validation of revised WHO-ILAR-COPCORD core English questionnaire translated to Bangla. *Int J Rheum Dis*. 2021; 00: 1– 14. <https://doi.org/10.1111/1756-185X.14176>
- <sup>19</sup> van Tulder M, Becker A, Bekkering T, et al. COST B13 Working Group on Guidelines for the Management of Acute Low Back Pain in Primary Care. Chapter 3. European guidelines for the management of acute nonspecific low back pain in primary care. *Eur Spine J*. 2006 Mar;15 Suppl 2(Suppl 2):S169-91. doi: 10.1007/s00586-006-1071-2.



- 1  
2  
3  
4 20 Zaman MM, Rahman MM, Rahman MR, et al. Prevalence of risk factors for non-  
5 communicable diseases in Bangladesh: Results from STEPS survey 2010. *Indian J Public*  
6 *Health*. 2016 Jan-Mar;60(1):17-25. doi: 10.4103/0019-557X.177290.  
7  
8  
9  
10 21 Islam N, Baron Basak T, OudeVoshaar MA, et al. Cross-cultural adaptation and validation  
11 of a Bengali Health Assessment Questionnaire for use in rheumatoid arthritis patients. *Int J*  
12 *Rheum Dis*. 2013 Aug;16(4):413-7. doi: 10.1111/1756-185X.12032.  
13  
14  
15 22 Misra A. Ethnic-Specific Criteria for Classification of Body Mass Index: A Perspective for  
16 Asian Indians and American Diabetes Association Position Statement. *Diabetes Technol*  
17 *Ther*. 2015 Sep;17(9):667-71. doi: 10.1089/dia.2015.0007.  
18  
19  
20 23 Jaques H. Introducing the National Institute for Health and Clinical Excellence. *Eur Heart*  
21 *J*. 2012 Sep;33(17):2111-2. PMID: 23106069.  
22  
23  
24 24 Ahmad OB, Boschi-Pinto C, Lopez AD, et al. Age Standardization of Rates: A New WHO  
25 Standard. GPE Discussion Paper Series: No31 Geneva, Switzerland: World Health  
26 Organization, 2001.  
27  
28  
29 25 WMA Declaration of Helsinki - ethical principles for medical research involving human  
30 respondents. [Cited on: 2020 Aug 29] Available from: [https://www.wma.net/policies-](https://www.wma.net/policies-post/wma-declaration-of-helsinki-ethical-principlesfor-medical-research-involving-human-respondents/)  
31 [post/wma-declaration-of-helsinki-ethical-principlesfor-medical-research-involving-human-](https://www.wma.net/policies-post/wma-declaration-of-helsinki-ethical-principlesfor-medical-research-involving-human-respondents/)  
32 [respondents/](https://www.wma.net/policies-post/wma-declaration-of-helsinki-ethical-principlesfor-medical-research-involving-human-respondents/).  
33  
34  
35 26 Dutmer AL, Schiphorst Preuper HR, Soer R, et al. Personal and Societal Impact of Low  
36 Back Pain: The Groningen Spine Cohort. *Spine (Phila Pa 1976)*. 2019 Dec 15;44(24):E1443-  
37 E1451. doi: 10.1097/BRS.0000000000003174.  
38  
39  
40 27 Al-Awadhi AM, Olusi SO, Al-Saeid K, et al. Incidence of musculoskeletal pain in adult  
41 Kuwaitis using the validated Arabic version of the WHO-ILAR COPCORD Core  
42 Questionnaire. *Annals of Saudi Medicine*. 2005 Nov-Dec;25(6):459-462. DOI:  
43 10.5144/0256-4947.2005.459.  
44  
45  
46 28 Aldeen Sarakbi H, Alsaed O, Hammoudeh M, et al.. Epidemiology of musculoskeletal  
47 complaints and diseases in Qatar: A cross-sectional study. *Qatar Med J*. 2020 Nov  
48 12;2020(2):29. doi: 10.5339/qmj.2020.29.  
49  
50  
51  
52  
53  
54  
55  
56  
57  
58  
59  
60

- 1  
2  
3  
4  
5  
6  
7  
8  
9  
10  
11  
12  
13  
14  
15  
16  
17  
18  
19  
20  
21  
22  
23  
24  
25  
26  
27  
28  
29  
30  
31  
32  
33  
34  
35  
36  
37  
38  
39  
40  
41  
42  
43  
44  
45  
46  
47  
48  
49  
50  
51  
52  
53  
54  
55  
56  
57  
58  
59  
60
- 
- <sup>29</sup> Bansal D, Asrar MM, Ghai B, et al. Prevalence and Impact of Low Back Pain in a Community-Based Population in Northern India. *Pain Physician*. 2020 Jul;23(4):E389-E398. PMID: 32709185.
- <sup>30</sup> Veerapen K, Wigley RD, Valkenburg H. Musculoskeletal pain in Malaysia: a COPCORD survey. *J Rheumatol*. 2007 Jan;34(1):207-13. PMID: 17216688.
- <sup>31</sup> GBD 2017 Disease and Injury Incidence and Prevalence Collaborators. Global, regional, and national incidence, prevalence, and years lived with disability for 354 diseases and injuries for 195 countries and territories, 1990-2017: a systematic analysis for the Global Burden of Disease Study 2017. *Lancet*. 2018 Nov 10;392(10159):1789-1858. doi: 10.1016/S0140-6736(18)32279-7.
- <sup>32</sup> Hoy D, Brooks P, Blyth F, et al. The Epidemiology of low back pain. *Best Practice & Research Clinical Rheumatology*. 2010 Dec;24(6):769–81. doi: 10.1016/j.berh.2010.10.002.
- <sup>33</sup> Loney PL, Stratford PW. The prevalence of low back pain in adults: a methodological review of the literature. *Phys Ther*. 1999 Apr;79(4):384-96. PMID: 10201544.
- <sup>34</sup> Manogharan S, Kongsted A, Ferreira ML, et al. Do older adults with chronic low back pain differ from younger adults in regards to baseline characteristics and prognosis? *Eur J Pain (United Kingdom)*. 2017;21(5):866–73.
- <sup>35</sup> Edwards J, Hayden J, Asbridge M, et al. The prevalence of low back pain in the emergency department: a descriptive study set in the Charles V. Keating Emergency and Trauma Centre, Halifax, Nova Scotia, Canada. *BMC Musculoskelet Disord*. 2018 Aug 23;19(1). doi: 10.1186/s12891-018-2237-x.
- <sup>36</sup> Yue P, Liu F, Li L. Neck/shoulder pain and low back pain among school teachers in China, prevalence and risk factors. *BMC Public Health*. 2012 Sep 14;12(1). doi: 10.1186/1471-2458-12-789.
- <sup>37</sup> Craft RM, Mogil JS, Aloisi AM. Sex differences in pain and analgesia: the role of gonadal hormones. *European Journal of Pain*. 2004 Oct;8(5):397–411. doi: 10.1016/j.ejpain.2004.01.003

- 1  
2  
3  
4 38 Berkley KJ. Sex differences in pain. *Behav Brain Sci*. 1997 Sep;20(3):371–80. doi:  
5 10.1017/s0140525x97221485.  
6  
7  
8  
9 39 Keogh E. Sex Differences in Pain. *Reviews in Pain*. 2008 Dec;2(2):4–7. doi:  
10 10.1177/204946370800200203.  
11  
12  
13 40 Leboeuf-Yde C. Body Weight and Low Back Pain. *Spine*. 2000 Jan;25(2):226. doi:  
14 10.1097/00007632-200001150-00015.  
15  
16  
17 41 Webb R, Brammah T, Lunt M, et al. Prevalence and Predictors of Intense, Chronic, and  
18 Disabling Neck and Back Pain in the UK General Population. *Spine*. 2003 Jun;28(11):1195–  
19 202. doi: 10.1097/01.BRS.0000067430.49169.01.  
20  
21  
22  
23 42 Shmagel A, Foley R, Ibrahim H. Epidemiology of Chronic Low Back Pain in US Adults:  
24 Data From the 2009-2010 National Health and Nutrition Examination Survey. *Arthritis Care*  
25 & Research. 2016 Oct 26;68(11):1688–94. doi: 10.1002/acr.22890.  
26  
27  
28  
29 43 Deyo RA, Tsui-wu YJ. Descriptive Epidemiology of Low-back Pain and Its Related  
30 Medical Care in the United States. *Spine*. 1987 Apr;12(3):264–8. doi: 10.1097/00007632-  
31 198704000-00013.  
32  
33  
34  
35 44 Rubin DI. Epidemiology and Risk Factors for Spine Pain. *Neurologic Clinics*. 2007  
36 May;25(2):353–71. doi: 10.1016/j.ncl.2007.01.004.  
37  
38  
39  
40 45 Frymoyer JW, Pope MH, Costanza MC, et al. Epidemiologic Studies of Low-Back Pain.  
41 *Spine*. 1980 Sep;5(5):419–23. doi: 10.1097/00007632-198009000-00005.  
42  
43  
44  
45 46 Coggon D, Ntani G, Palmer KT, et al. Drivers of international variation in prevalence of  
46 disabling low back pain: Findings from the Cultural and Psychosocial Influences on  
47 Disability study. *European journal of pain*. 2018 Jun 27;23(1):35–45. doi: 10.1002/ejp.1255.  
48  
49  
50  
51 47 Harris IA, Young JM, Rae H, et al. Factors associated with back pain after physical injury:  
52 a survey of consecutive major trauma patients. *Spine (Phila Pa 1976)*. 2007 Jun  
53 15;32(14):1561-5. doi: 10.1097/BRS.0b013e318067dce8.  
54  
55  
56  
57 48 Maher C, Underwood M, Buchbinder R. Non-specific low back pain. *The Lancet*. 2017  
58 Feb;389(10070):736–47. doi: 10.1016/S0140-6736(16)30970-9.  
59  
60

1  
2  
3  
4 <sup>49</sup> Bae Y-H, Shin J-S, Lee J, et al. Association between Hypertension and the Prevalence of  
5 Low Back Pain and Osteoarthritis in Koreans: A Cross-Sectional Study. Fuchs FD, editor.  
6 PLoS ONE. 2015 Sep 22;10(9):e0138790. doi: 10.1371/journal.pone.0138790.  
7  
8  
9  
10  
11  
12  
13  
14  
15  
16  
17  
18  
19  
20  
21  
22  
23  
24  
25  
26  
27  
28  
29  
30  
31  
32  
33  
34  
35  
36  
37  
38  
39  
40  
41  
42  
43  
44  
45  
46  
47  
48  
49  
50  
51  
52  
53  
54  
55  
56  
57  
58  
59  
60

For peer review only

1  
2  
3  
4  
5  
6  
7  
8  
9  
10  
11  
12  
13  
14  
15  
16  
17  
18  
19  
20  
21  
22  
23  
24  
25  
26  
27  
28  
29  
30  
31  
32  
33  
34  
35  
36  
37  
38  
39  
40  
41  
42  
43  
44  
45  
46  
47  
48  
49  
50  
51  
52  
53  
54  
55  
56  
57  
58  
59  
60

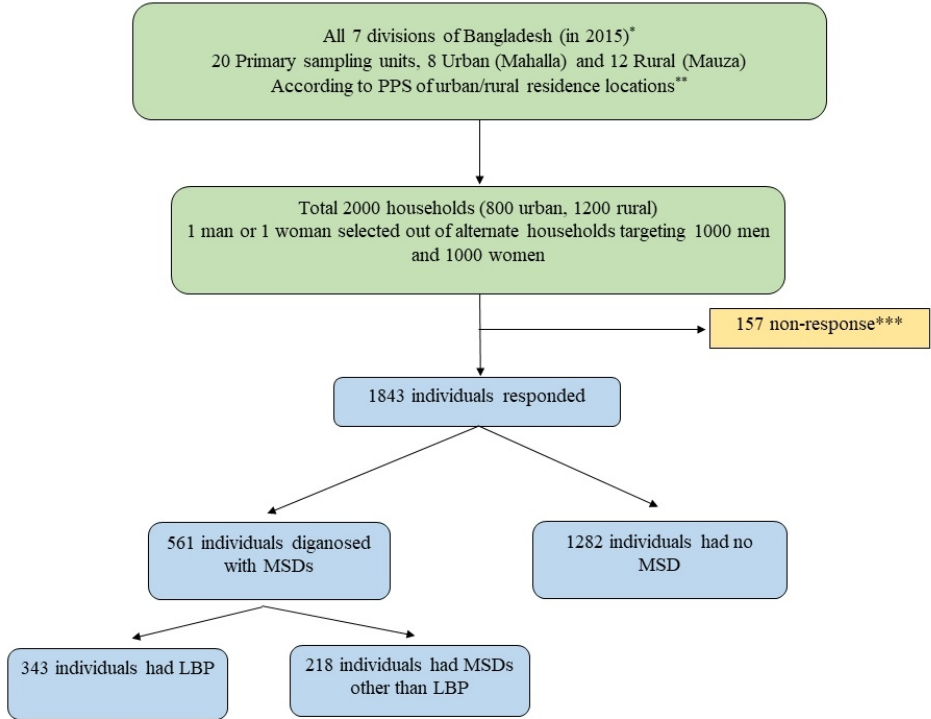

254x190mm (96 x 96 DPI)

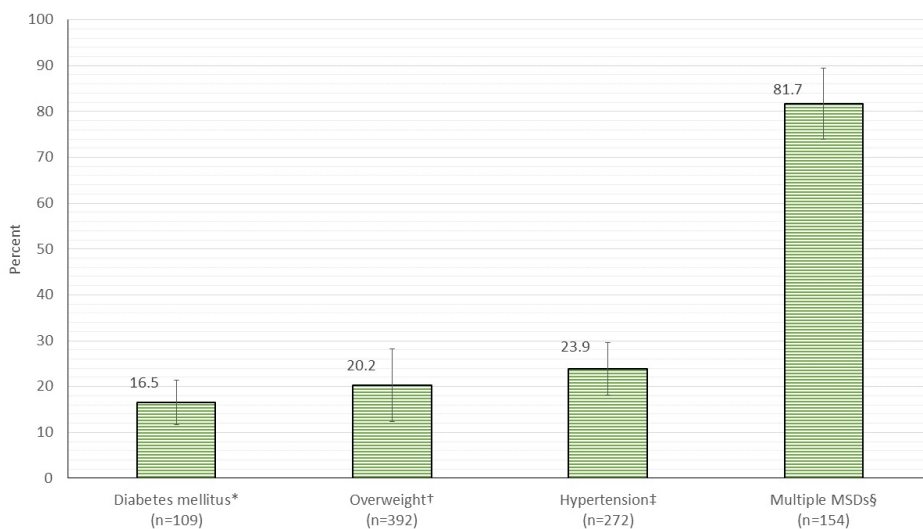

338x190mm (96 x 96 DPI)

1  
2  
3  
4  
5  
6  
7  
8  
9  
10  
11  
12  
13  
14  
15  
16  
17  
18  
19  
20  
21  
22  
23  
24  
25  
26  
27  
28  
29  
30  
31  
32  
33  
34  
35  
36  
37  
38  
39  
40  
41  
42  
43  
44  
45  
46  
47  
48  
49  
50  
51  
52  
53  
54  
55  
56  
57  
58  
59  
60

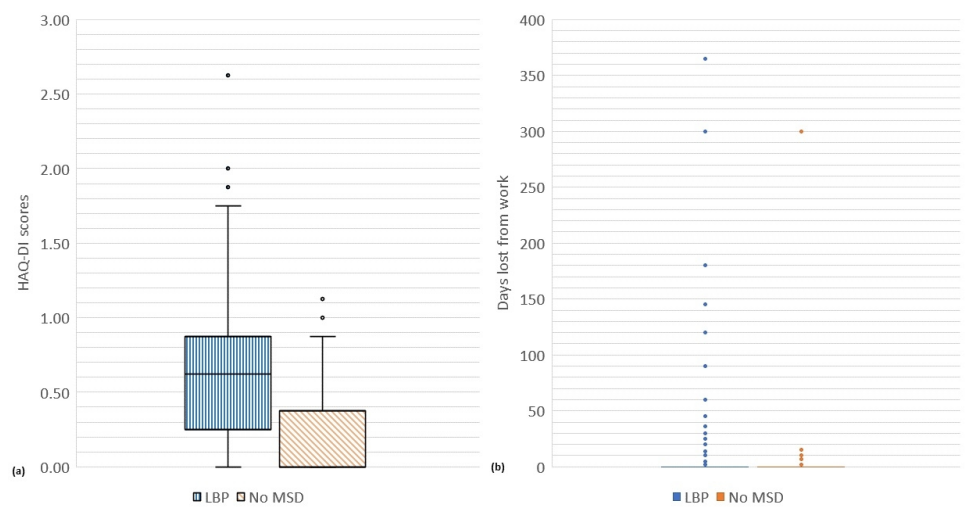

338x190mm (96 x 96 DPI)

# BMJ Open

## Low Back Pain in the Bangladeshi Adult Population: A Cross-sectional National Survey

|                                 |                                                                                                                                                                                                                                                                                                                                                                                                                                                                                                                                                                                                                                  |
|---------------------------------|----------------------------------------------------------------------------------------------------------------------------------------------------------------------------------------------------------------------------------------------------------------------------------------------------------------------------------------------------------------------------------------------------------------------------------------------------------------------------------------------------------------------------------------------------------------------------------------------------------------------------------|
| Journal:                        | <i>BMJ Open</i>                                                                                                                                                                                                                                                                                                                                                                                                                                                                                                                                                                                                                  |
| Manuscript ID                   | bmjopen-2021-059192.R1                                                                                                                                                                                                                                                                                                                                                                                                                                                                                                                                                                                                           |
| Article Type:                   | Original research                                                                                                                                                                                                                                                                                                                                                                                                                                                                                                                                                                                                                |
| Date Submitted by the Author:   | 06-Jul-2022                                                                                                                                                                                                                                                                                                                                                                                                                                                                                                                                                                                                                      |
| Complete List of Authors:       | Momen Majumder, Muhammad Shoaib; Bangabandhu Sheikh Mujib Medical University, Rheumatology<br>Hakim, Ferdous; World Health Organization Bangladesh<br>Bandhan, Iftekhar ; Bangabandhu Sheikh Mujib Medical University, Rheumatology<br>Razzaque, Mohammad Abdur; Chittagong Medical College, Medicine<br>Zahid-Al-Quadir, Ahmad ; Sylhet MAG Osmani Medical College, Medicine<br>Ahmed, Shamim; Bangabandhu Sheikh Mujib Medical University<br>Choudhury, Minhaj; Bangabandhu Sheikh Mujib Medical University, Rheumatology<br>Haq, Syed; Bangabandhu Sheikh Mujib Medical University, Rheumatology<br>Zaman, MM; WHO Bangladesh |
| <b>Primary Subject Heading</b>: | Epidemiology                                                                                                                                                                                                                                                                                                                                                                                                                                                                                                                                                                                                                     |
| Secondary Subject Heading:      | Rheumatology                                                                                                                                                                                                                                                                                                                                                                                                                                                                                                                                                                                                                     |
| Keywords:                       | EPIDEMIOLOGY, RHEUMATOLOGY, PUBLIC HEALTH, PREVENTIVE MEDICINE                                                                                                                                                                                                                                                                                                                                                                                                                                                                                                                                                                   |
|                                 |                                                                                                                                                                                                                                                                                                                                                                                                                                                                                                                                                                                                                                  |

SCHOLARONE™  
Manuscripts





I, the Submitting Author has the right to grant and does grant on behalf of all authors of the Work (as defined in the below author licence), an exclusive licence and/or a non-exclusive licence for contributions from authors who are: i) UK Crown employees; ii) where BMJ has agreed a CC-BY licence shall apply, and/or iii) in accordance with the terms applicable for US Federal Government officers or employees acting as part of their official duties; on a worldwide, perpetual, irrevocable, royalty-free basis to BMJ Publishing Group Ltd ("BMJ") its licensees and where the relevant Journal is co-owned by BMJ to the co-owners of the Journal, to publish the Work in this journal and any other BMJ products and to exploit all rights, as set out in our [licence](#).

The Submitting Author accepts and understands that any supply made under these terms is made by BMJ to the Submitting Author unless you are acting as an employee on behalf of your employer or a postgraduate student of an affiliated institution which is paying any applicable article publishing charge ("APC") for Open Access articles. Where the Submitting Author wishes to make the Work available on an Open Access basis (and intends to pay the relevant APC), the terms of reuse of such Open Access shall be governed by a Creative Commons licence – details of these licences and which [Creative Commons](#) licence will apply to this Work are set out in our licence referred to above.

Other than as permitted in any relevant BMJ Author's Self Archiving Policies, I confirm this Work has not been accepted for publication elsewhere, is not being considered for publication elsewhere and does not duplicate material already published. I confirm all authors consent to publication of this Work and authorise the granting of this licence.

# 1 Low Back Pain in the Bangladeshi Adult Population: A Cross-sectional National Survey

## 2 3 *Short Running Head: Low Back Pain in Bangladesh*

4 **Authors:** Muhammad Shoaib Momen Majumder, Ferdous Hakim, Iftexhar Hussain Bandhan,  
5 Mohammad Abdur Razzaque, Ahmad Zahid-Al-Quadir, Shamim Ahmed, Minhaj Rahim  
6 Choudhury, Syed Atiqul Haq, Mohammad Mostafa Zaman

### 7 8 **Author names, highest academic degrees, appointments, Email and ORCID:**

9 Muhammad Shoaib Momen Majumder, FCPS (Medicine), MD (Rheumatology); Department of  
10 Rheumatology, Bangabandhu Sheikh Mujib Medical University (Ringgold ID 74464), Bangladesh,  
11 Email: momen.shoaib@gmail.com, ORCID ID: <https://orcid.org/0000-0002-7901-0847>;

12 Ferdous Hakim, MPH (Epidemiology), Research and Publication, World Health Organization  
13 Bangladesh (Ringgold ID 215134), Email: hakimf@who.int, ORCID: <https://orcid.org/0000-0003-2376-3978>;

14 Iftexhar Hussain Bandhan, MD (Rheumatology), Department of Rheumatology, Bangabandhu Sheikh  
15 Mujib Medical University (Ringgold ID 74464), Bangladesh, Email: ibandhan@gmail.com, ORCID  
16 ID: <https://orcid.org/0000-0002-3800-6155>;

17 Mohammad Abdur Razzaque, MD (Rheumatology), Register, Department of Medicine, Chittagong  
18 Medical College (Ringgold ID 467859), Bangladesh, Email: rhrazzaq@gmail.com, ORCID ID:  
19 <https://orcid.org/0000-0002-2395-542X>;

20 Ahmad Zahid-Al-Quadir, MD (Rheumatology), Department of Medicine, Sylhet MAG Osmani  
21 Medical College (Ringgold ID 469196), Email: drzahidssmc@gmail.com, <https://orcid.org/0000-0003-4178-6487>;

22 Shamim Ahmed, FCPS (Medicine), Associate Professor of Rheumatology, Bangabandhu Sheikh  
23 Mujib Medical University (Ringgold ID 74464), Dhaka, Bangladesh, Email:  
24 dr\_shamim\_ahmed@yahoo.com;

25 Minhaj Rahim Choudhury, MD, FCPS (Medicine) Professor of Rheumatology, Bangabandhu Sheikh  
26 Mujib Medical University (Ringgold ID 74464), Dhaka, Bangladesh, Email: drminhaj11@gmail.com,  
27 ORCID ID: <https://orcid.org/0000-0002-8695-5240>;

28 Syed Atiqul Haq, FCPS (Medicine), MD, FRCP, Professor of Rheumatology, Bangabandhu Sheikh  
29 Mujib Medical University (Ringgold ID 74464), Dhaka, Bangladesh, Email:  
30 haqsyedatiqul@gmail.com, ORCID ID: <https://orcid.org/0000-0003-4154-7283>

31 Mohammad Mostafa Zaman, PhD (Epidemiology), Advisor, Research and Publication, World Health  
32 Organization Bangladesh (Ringgold ID 215134), Email: zamanm@who.int, ORCID ID:  
33 <https://orcid.org/0000-0002-1736-1342>;

34 **Counts:** Number of words (abstract): 264, number of words (body): 3580, number of  
35 references: 61, number of tables: 04, number of figures: 02

36  
37  
38  
39  
40  
41  
42  
43  
44  
45  
46  
47  
48 **Name, address, email of the author responsible for correspondence:**

1  
2  
3  
4 49 Muhammad Shoaib Momen Majumder, FCPS (Medicine), MD (Rheumatology); Department of  
5 50 Rheumatology, Bangabandhu Sheikh Mujib Medical University (Ringgold ID 74464), Bangladesh,  
6 51 Email: [momen.shoaib@gmail.com](mailto:momen.shoaib@gmail.com), ORCID ID: <https://orcid.org/0000-0002-7901-0847>  
7  
8  
9

## 10 53 **ABSTRACT**

### 11 54 **Objective:**

12 55 Low back pain (LBP) is a common musculoskeletal disorder. This study aims to determine  
13 56 the residence- and sex-specific prevalence and the risk factors of LBP in Bangladesh.  
14  
15  
16  
17  
18

### 19 58 **Methods:**

20 59 The study subjects (ages  $\geq 18$  years) were identified from 20 primary sampling units of the  
21 60 national census following a cross-sectional multi-stage stratified sampling design. We  
22 61 considered the mechanical type of LBP for this study. A Bangla version of the modified  
23 62 Community Oriented Program for Control of Rheumatic Disorders questionnaire was used.  
24 63 A team of trained field workers, rheumatology residents and rheumatologists collected the  
25 64 data. Analysis was done using weighted data.  
26  
27  
28  
29  
30  
31

### 32 66 **Results:**

33 67 Two thousand subjects were approached, but 1843 could be screened. Among them, 561 had  
34 68 musculoskeletal disorders, and 343 were diagnosed with LBP. The weighted prevalence of  
35 69 LBP was 18.5% (95% confidence interval, CI: 11.8–25.2) and age-standardized prevalence of  
36 70 LBP was 19.4% (95% confidence interval, CI: 14.0–24.8), which was higher in women  
37 71 (27.2%, 19.3–35.1) than men (14.0%, 8.7–19.3). The prevalence persistently increased from  
38 72 the age group 18–34 years (10.5%, 5.7–15.4) to  $\geq 55$  years (27.8%, 16.1–39.5). People with  
39 73 no education had the highest prevalence (31.3%, 22.3–40.4). The prevalence did not differ  
40 74 between urban and rural residential locations. Four factors were significantly associated with  
41 75 LBP: age (adjusted odds ratio (2.4, 95% CI: 1.7–3.4), female sex (2.2, 1.5–3.3), absence of  
42 76 formal education (2.3, 1.6–3.3), and hypertension (1.7, 1.1–2.6).  
43  
44  
45  
46  
47  
48  
49  
50  
51  
52  
53

### 54 78 **Conclusion:**

1  
2  
3  
4 79 LBP is a common problem in Bangladeshi adults. The risk factors are age, female sex, no  
5  
6 80 formal education, and hypertension. These should be addressed adequately to prevent and  
7  
8 81 treat LBP.  
9

10 82

11 83 **Keywords:** Low back pain, risk factors, Bangladesh, prevalence, cross-sectional survey  
12

13 84

### 14 85 **Strengths and Limitations**

15  
16 86 ▪ We report the weighted prevalence of low back pain by sociodemographic characteristics,  
17  
18 87 co-morbidities, disability and work loss and identified risk factors for low back pain  
19  
20 88 patients for the first time in Bangladesh.

21 89 ▪ All the diagnoses were made by rheumatology residents and expert rheumatologists in the  
22  
23 90 field.

24  
25 91 ▪ Some diagnoses of evolving rheumatological conditions might lack validity because of the  
26  
27 92 lack of quality laboratory facilities in the field.

28 93 ▪ The sample size calculation is based on the combined prevalence of musculoskeletal  
29  
30 94 disorders that warrant cautious interpretation of the results because of inadequate sample  
31  
32 95 size, especially when split into reporting domains.

33  
34 96 ▪ The recall period for determining work loss was 12 months which might induce bias.  
35

36 97  
37  
38  
39  
40  
41  
42  
43  
44  
45  
46  
47  
48  
49  
50  
51  
52  
53  
54  
55  
56  
57  
58  
59  
60

## 98 INTRODUCTION

99 Low back pain (LBP) is one of the most frequent medical problems globally<sup>1</sup>. It is defined as  
100 pain, stiffness, or muscle tension localised below the costal margin and above the inferior  
101 gluteal folds<sup>2</sup>. Up to 84% of adults suffer from LBP at some point in life<sup>3</sup>. The prevalence of  
102 chronic LBP is about 23%<sup>4</sup>. Around 11–12% of the population become disabled due to  
103 LBP<sup>1</sup>. It causes substantial personal, social and financial burdens globally<sup>1</sup>. In the USA,  
104 LBP is the second most frequent cause for a physician consultation<sup>5</sup>. LBP is ranked globally  
105 as the topmost cause of disability as it affects mostly working-age people<sup>6</sup>. It accounted for  
106 60.1 million disability-adjusted life-years in 2015<sup>7</sup>. There was a significant increase in LBP  
107 by 54% since 1990, and the highest escalation took place in the low and middle-income  
108 countries (LMICs)<sup>7</sup>. Disability from LBP is a primary concern for the LMICs, including  
109 Bangladesh, where manual labour—rickshaw pulling, day labourers, housemaids, work  
110 exposure to the lifting of heavy weight during their day-to-day activities etc.—is common<sup>7</sup>.  
111 The scope for job switching is restricted in resource constraint countries.

112  
113 LBP has multi-sectorial health outcomes like a lower quality of life, poorer self-reported  
114 health, depression and more workspace absenteeism<sup>8</sup>. As a result, LBP has become an  
115 important cause of sick leave and early retirement among the working population<sup>9</sup>. In the  
116 USA, approximately 149 million workdays are lost due to LBP, leading to an estimated loss  
117 of 100–200 billion US dollars per year<sup>10</sup>. Non-specific LBP is the commonest of all causes  
118 of LBP<sup>4</sup>. Non-specific LBP is defined as LBP not particularly attributable to specific  
119 aetiology like malignancy, infection, fracture, inflammatory condition, radiculopathy or  
120 cauda equina syndrome<sup>4</sup>.

121  
122 Albeit high in most studies, there is a difference in LBP prevalence in various  
123 epidemiological studies. The estimated lifetime prevalence was 84.1% in a Canadian study<sup>11</sup>,  
124 70% in Denmark<sup>12</sup>, and 59% in the UK<sup>13</sup>. In Iran, the prevalence of LBP was 29.3%<sup>14</sup>. The  
125 estimated prevalence of LBP in India ranged between 42 and 83%<sup>15 16</sup>. A recent cross-  
126 sectional, community-based, epidemiological study conducted in Northern India yielded an  
127 estimated lifetime prevalence of 47% in man 57% in women<sup>17</sup>. A Community Oriented  
128 Program for Control of Rheumatic Disorders (COPCORD) survey in Bangladesh published  
129 in 2005 showed 6.6%, 9.9%, and 9.2% prevalence of LBP in the rural, urban slum, and

1  
2  
3  
4 130 affluent urban areas, respectively<sup>18</sup>. A cross-sectional national study in Bangladesh in 2015  
5 131 showed LBP was the top-ranking musculoskeletal disorder (MSD) with a prevalence of  
6 132 18.6%<sup>19</sup>. We have further analysed the data from the 2015 study and reported the population-  
7 133 weighted prevalence according to sociodemographic factors, co-morbid conditions, disability  
8 134 and work loss due to LBP, and identified the risk factors of LBP.  
9  
10  
11  
12

13 135

## 14 136 **METHODS**

15 137 A detailed description of the methodology is beyond the scope of this article and is described  
16 138 elsewhere<sup>19</sup>. Adults aged 18 years or more comprised the study population through a  
17 139 household-level multi-stage stratified cross-sectional survey. The sampling frame was based  
18 140 on the 2001 Bangladesh Census<sup>20</sup>. Based on a point prevalence of MSD and with a design  
19 141 effect of 1.5 and 85% response rate for four reporting domains (man-woman, urban-rural),  
20 142 the calculated sample size was 1,978, which was rounded to 2,000. It was stratified into  
21 143 seven divisions of rural (Mauza) and urban (Mahalla) areas. Twenty (8 urban and 12 rural)  
22 144 primary sampling units (PSUs) were selected. The first 100 households were consecutively  
23 145 included from each PSU, where even numbers were assigned as man and odd numbers as  
24 146 woman households. In each household, a single respondent was identified from a list of  
25 147 eligible household members with the help of a Kish table. Data were collected in November  
26 148 and December of 2015. **(Figure 1)**  
27  
28  
29  
30  
31  
32  
33  
34  
35  
36

37 149

38 150 A detailed manual was prepared before the training for this survey and was used by all field  
39 151 staff. All investigators and the WHO technical team coordinated and conducted the training.  
40 152 The modified COPCORD questionnaire was the survey tool<sup>21</sup>. The English version of the  
41 153 first part of the questionnaire was translated to Bangla, then adapted according to the  
42 154 guideline of Beaton et al.<sup>22</sup>, validated by Chassany's Method<sup>23</sup>, and administered by the  
43 155 interviewers. Data were collected for six days from each PSU. There were two recall visits  
44 156 to ensure participation. The research physician interviewed the suspected respondents for  
45 157 MSDs. A subject was considered a positive respondent if he/she reported pain in muscles,  
46 158 bones, joints, or any part of the body (musculoskeletal system) during the preceding seven  
47 159 days. Subjects who were taking pain medications like non-steroidal anti-inflammatory drugs  
48 160 (NSAID) or steroids were considered positive respondents even if they did not report pain on  
49 161 those seven days. All positive respondents were interviewed and examined by the research  
50  
51  
52  
53  
54  
55  
56  
57  
58  
59  
60

1  
2  
3  
4 162 physicians. Internationally accepted criteria were used for the diagnosis of the diseases. For  
5 163 the conditions without any internationally accepted criteria, relevant investigations and  
6 164 clinical judgment of the research physician were used. A rheumatologist checked and  
7 165 verified the final diagnoses during their visit to respective PSUs.  
8  
9  
10  
11 166

12  
13 167 LBP group of disorders were operationally defined as mechanical type back pain that  
14 168 included non-specific LBP and lumbar spondylosis. Considering the limitation of  
15 169 differentiating investigation in the field, we did not classify LBP beyond this. LBP duration  
16 170 was classified into three groups: acute: up to 6 weeks; subacute: 6-12 weeks; and chronic,  
17 171 which persists beyond 12 weeks<sup>24</sup>. Respondents with pain in the muscles, bones, joints, or  
18 172 any part of the body (musculoskeletal symptom) during the preceding seven days or on pain  
19 173 medication with no pain were considered positive respondents. The research physicians  
20 174 interviewed and thoroughly examined all 'positive' respondents. Data on physical activity  
21 175 were calculated into metabolic equivalent tasks (MET)-minutes per week using the  
22 176 STEPwise Surveillance of noncommunicable disease risk factors (STEPS) protocol and  
23 177 divided into quartiles<sup>25</sup>. The 4<sup>th</sup> quartile was labelled as strenuous physical activity.  
24  
25  
26  
27  
28  
29  
30  
31  
32 178

33  
34 179 The study participants were divided into three subgroups as per age in years: 18-34, 35-54  
35 180 and 55-99. We considered ownership of household asset items (electricity, television,  
36 181 refrigerator, etc.) for constructing wealth index. In addition, the type of main material used  
37 182 for the roof of the main house (cement, tin and katcha such as bamboo/thatched/straw/gunny  
38 183 etc.) was also included in the model. A principal component analysis was used to create  
39 184 standardised factor scores for each of the items. The total scores for the respondents were  
40 185 calculated and categorised into quartiles for description from one (lowest household wealth)  
41 186 to four (highest household wealth)<sup>19</sup>.  
42  
43  
44  
45  
46  
47  
48  
49  
50  
51  
52  
53  
54  
55  
56  
57  
58  
59  
60

187  
188 A validated Bangla version of the Bangla Health Assessment Questionnaire - Disability Index  
189 (HAQ-DI) was used for the disability score. For determining work loss, the recall period was  
190 12 months<sup>26</sup>. Random capillary blood glucose was measured by using glucometer (Accu-  
191 Check Germany). Using height (meters) and weight (kilograms) measurements, we  
192 calculated BMI [weight (kg)/height (meter)<sup>2</sup>]. Waist circumference was measured by placing  
193 a measuring tape horizontally above the iliac crest. Diabetes was defined as random blood

1  
2  
3  
4 194 glucose  $\geq 11.1$  mmol/l or the use of anti-diabetic medications. Obesity was defined as a body  
5  
6 195 mass index of  $\geq 25$  kg/meter squared<sup>27</sup>.

7  
8 196

9 197 **Statistical analysis:**

10 198 The survey data were entered and cleaned using Microsoft Excel. We have weighted<sup>28</sup> the  
11 199 data to reflect the population frame of Bangladesh for the year 2015. Base weight—for the  
12 200 sampled population—was calculated using the probability of selection of respondents among  
13 201 the eligible number of members of the household in a cluster defined by divisions (7), age  
14 202 groups (3) and sexes (2). The base weight was adjusted with non-response weights  
15 203 separately for men and women by three age groups. The final weight was generated after  
16 204 calibration to frame population (2015) in domains by division, sex and age groups. Analysis  
17 205 was done using the final weights.

18 206

19 207 Statistical analysis was done using Epi Info Version 7.1.5.2 and SPSS Version 20.0.

20 208 Continuous variables were categorised before analysis as appropriate. We estimated the  
21 209 prevalence of LBP with 95% confidence intervals. The prevalence was segregated by  
22 210 residence (urban/ rural) and sex (man/ woman). Nonparametric test (Kruskal-Wallis H test)  
23 211 was used to analyse data that were not normally distributed. The confidence intervals were  
24 212 suppressed whenever we encountered an unweighted respondent size of less than 25. Age-  
25 213 standardization of prevalence estimates was made for global comparison using the WHO  
26 214 World Population 2000-2025<sup>29</sup>. Factors were checked for association with LBP by  
27 215 comparing LBP with no MSD through 2x2 tables. Univariate logistic regression analysis was  
28 216 done to obtain unadjusted odds ratios. All statistically significant relationships ( $P < 0.05$ ) were  
29 217 entered into a model for logistic regression analysis. The adjusted odds ratios and their 95%  
30 218 confidence limits were calculated to identify the strength of association of LBP factors. A  
31 219 detailed description of categorisation and analysis of other variables was described  
32 220 elsewhere<sup>19</sup>.

33 221

34 222 **Ethics Approval and Consent to Participate:**

35 223 Ethical guidelines, as outlined by the Declaration of Helsinki, were followed throughout the  
36 224 study<sup>30</sup>. Ethical clearance was obtained from the Institutional Review Board of Bangabandhu



225 Sheikh Mujib Medical University (ID 1100). Informed written consent was obtained from  
226 the respondents in Bangla per Institutional Review Board's guidelines.

227

### 228 **Patient and Public Involvement:**

229 Patients or the public were not involved in this study's design, conduct, reporting, or  
230 dissemination plans.

231

## 232 **RESULTS**

### 233 **Characteristics of respondents:**

234 In this nationally representative study, 2,000 adults 18 years or older were approached, and  
235 1,843 (92.2%) agreed to participate<sup>19</sup>. The mean age of the participants was 40.5 (standard  
236 deviation 14.7) years, and 51.6% were women. A total of 561 (30.4%) had some type of  
237 MSDs. LBP was the most common among MSDs (18.6%, unadjusted), followed by knee  
238 osteoarthritis (7.3%) and soft-tissue rheumatism (5.2%). Among the inflammatory rheumatic  
239 diseases, the common conditions were rheumatoid arthritis (1.6%) and spondyloarthritis  
240 (1.3%).

241

242 **Table 1** shows the changes brought in by the weighting procedure on the unweighted sample.  
243 The weighted percentages are more in line with the projected Population Frame<sup>20</sup> from which  
244 the study sample was drawn.

245

### 246 **Characteristics of respondents with LBP:**

#### 247 **Prevalence:**

248 We report here (**Table 2**) weighted prevalence of LBP was 18.5% (95% CI: 11.8–25.2).  
249 However, the age-standardised prevalence of LBP is 19.4% (95% CI: 14.0–24.8), which is  
250 significantly higher in women (27.2%, 19.3–35.1) than in men (14.0%, 8.7–19.3). There has  
251 been a persistent increase in prevalence from 10.5% (95% CI 5.7–15.4) in the 18–34 years  
252 age group to 27.8% (95% CI 16.1–39.5) in the 55–99 years age group. This trend was more  
253 prominent in women. The prevalence did not vary significantly among occupational groups.  
254 People with no formal education had a significantly highest prevalence of LBP (31.3%, 22.3–  
255 40.4) compared to other educational groups. Although the highest prevalence (23.5% (13.9–  
256 33.0)) was observed in the 1st quartile of the wealth index, it did not vary significantly. LBP

was not significantly associated with strenuous physical activity in our sample. We checked LBP prevalence in urban (14.6%, 9.9–19.2) and rural (20.2%, 11.0.6–29.3) categories, but it did not differ significantly. Among the co-morbidities, the prevalence of LBP was higher among patients with hypertension (26.7%, 15.0–38.4) and obesity (20.6%, 13.0–28.3). The highest prevalence of LBP (87.3%, 80.2–94.4) was seen in respondents who had multiple (two or more) MSDs such as LBP, knee osteoarthritis, soft tissue rheumatism, non-inflammatory MSDs, cervical spondylosis etc. (Figure 2)

### **Background characteristics:**

Among the LBP respondents (n=343), 63.3% were women, and 65.3% were from rural areas. The mean age in years (95% confidence interval) was 45.3 (43.0–47.7) overall, and 48.3 (45.8–50.9) in men and 44.0 (41.0–47.0) in women. The study participants were divided into three subgroups per age, and the highest LBP was observed in the 35–54 age group. More than half (%, 95% confidence interval: 57.4%, 48.2–66.6) were homemakers (all women), while the rest constituted other occupations like a labourer, business professional, service holder and others. Almost half of the participants with LBP had no formal education (53.2%, 41.6–64.9). Overall, according to the wealth index, 33.2% (22.6–43.9) of respondents belonged to the 1<sup>st</sup> quartile (lowest socioeconomic status). About three-fourths of the respondents (77%, 55.9–98.0) had a rural residence. (Table 3)

### **Disability and work loss:**

The distribution of Bengali HAQ-DI scores was not normally distributed among the LBP patients. The scores ranged from 0–2.6. The LBP group's median (interquartile range) was 0.6 (0.3–0.9). The difference in Bangla HAQ-DI score between LBP (n=343) and no MSD (n=60) is statistically significant (P<0.0001) by the Kruskal-Wallis H test, indicating that LBP is associated with a higher disability. The LBP group's days lost from work had a highly skewed distribution and ranged from 0–365 days. However, the difference of days lost from work (n=1,625) between LBP (n=343) and no MSD (n=1,282) is statistically significant (P<0.0001) by the Kruskal-Wallis H test, indicating that LBP is associated with more days lost.

### **Risk factors:**

1  
2  
3  
4 289 Univariate logistic regression analysis did not show any significant association of LBP with  
5  
6 290 occupation, strenuous physical activity, wealth indices, tobacco use, obesity, and diabetes  
7  
8 291 (Table 4). A significant association was observed for the age group 35–99 years, female sex,  
9  
10 292 lack of education, history of physical trauma, and hypertension according to the unadjusted  
11  
12 293 odds ratio and their 95% confidence intervals ( $P<0.05$ ). These significant associations  
13  
14 294 ( $P<0.01$ ) persisted in the multiple logistic regression analysis having age, sex, education and  
15  
16 295 hypertension into the model simultaneously.

16 296

## 17 297 DISCUSSION

18  
19  
20 298 LBP is a common medical problem with very high personal and societal impact, leading to  
21  
22 299 poor quality of life and workability<sup>31</sup>. In this survey, we report that one in five adults in  
23  
24 300 Bangladesh suffers from LBP. The prevalence in Bangladesh is similar to Kuwait (22.7%)<sup>32</sup>  
25  
26 301 and Qatar (23.3%)<sup>33</sup> but lower than northern India (32%)<sup>34</sup> and Iran (29.3%)<sup>14</sup>. Malaysia  
27  
28 302 (11.6%)<sup>35</sup> has a lower prevalence of LBP than we report here. In some previous studies in  
29  
30 303 Bangladesh, the prevalence was found at 25.6% among medical students<sup>36</sup>, 36.6% among  
31  
32 304 bank employees<sup>37</sup>, and 60.8% among physiotherapists<sup>38</sup>. Lack of maintenance of correct  
33  
34 305 posture during sitting and scarcity of knowledge, understanding, or application of ergonomics  
35  
36 306 are responsible for the high prevalence rate among these groups<sup>36 38</sup>.

35 307

37 308 A systematic review of 165 studies from 54 countries revealed the global prevalence of LBP  
38  
39 309 of 12–33%<sup>1</sup>. According to the systematic analysis of the Global Burden of Disease Study  
40  
41 310 2017, LBP was the leading cause of YLDs (years lived with disability)<sup>39</sup>. In our study, the  
42  
43 311 rural people had a higher prevalence of LBP than the urban people. This difference—though  
44  
45 312 not statistically significant—was probably due to lower doctor concentration in the rural areas,  
46  
47 313 financial limitations, and less education status. However, regional variation was observed in  
48  
49 314 other studies<sup>14</sup>.

49 315

51 316 Age was a risk factor for LBP in this study. LBP prevalence persistently increased with age  
52  
53 317 but was not statistically significant. However, an analysis reported that the risk and  
54  
55 318 prevalence of low back pain increased with age<sup>5</sup>. A systematic review of the global  
56  
57 319 prevalence of LBP revealed the association of age was highest in the 40–49 age group<sup>1 40</sup>.  
58  
59 320 The overall prevalence rises with age 65, which gradually reduces after that<sup>41</sup>. Some possible

1  
2  
3  
4 321 explanations are LBP characteristics in older adults that differ from the middle-aged  
5  
6 322 population (less intense back pain, more leg pain, and more depression)<sup>42</sup>. Our study showed  
7  
8 323 a higher prevalence of LBP among women than men, consistent with some other analyses<sup>1 41</sup>.  
9  
10 324 This could be due to more household or domestic activities among women than men. This  
11  
12 325 finding agrees with the results from the national health survey on the Iranian population<sup>14</sup>.  
13  
14 326 Another Indian study found no significant difference in age and sex scores in their study<sup>43</sup>.  
15  
16 327 Higher women's prevalence can be partially explained that they have a lower pain threshold  
17  
18 328 than men<sup>44</sup>. The sex differences may be implied by gonadal steroid hormones like estradiol  
19  
20 329 and testosterone that modulate sensitivity to pain and analgesia<sup>45</sup>. Women always  
21  
22 330 experienced a higher frequency of visceral pain (e.g., during menstruation, pregnancy) than  
23  
24 331 men<sup>46</sup>. It seems that in painful conditions, women exhibit a greater prevalence than men as  
25  
26 332 women report more pain<sup>47</sup>.

27 333  
28 334 Leboeuf-Yde considered body weight as a possible weak indicator for LBP in his systematic  
29  
30 335 literature review due to lack of evidence<sup>48</sup>. The results obtained in our study did not  
31  
32 336 demonstrate a statistically significant association between LBP and higher BMI. Some other  
33  
34 337 studies found obesity or high BMI associated with an increased risk of LBP development and  
35  
36 338 severity<sup>14 49</sup>. However, a cross-sectional study including nine countries found BMI  $\geq 25\text{kg/m}^2$   
37  
38 339 as a risk factor for LBP in five countries (Finland, Poland, Russia, South Africa and Spain).  
39  
40 340 In contrast, it was not associated with LBP in the remaining four countries (China, Ghana,  
41  
42 341 India and Mexico)<sup>50</sup>.

43 342  
44 343 Our research found that the absence of formal education is significantly associated with LBP.  
45  
46 344 A cross-sectional study in the United States found that LBP is more common in people who  
47  
48 345 have had less than high school education<sup>51</sup>. Other studies in the USA, UK, and Iran found  
49  
50 346 lower educational status had an increased association with LBP and found higher education  
51  
52 347 inversely associated with LBP<sup>14 52</sup>. Several proposed mechanisms may explain the  
53  
54 348 relationship between low academic status and back pain. The amount of formal education  
55  
56 349 contributes to the types of jobs that an individual may involve in, and subsequently, the types  
57  
58 350 of jobs influence LBP<sup>53</sup>. Moreover, health education regarding posture management, lifestyle  
59  
60 351 changes, physical exercises, and stress management was poorly reached among people  
352 without formal education. We didn't find any significant association of LBP with occupation.

1  
2  
3  
4 353 However, in our opinion, the larger number of homemakers affected with LBP might be  
5  
6 354 linked with their nature of heavy work, such as squatting, bending, lifting heavy objects,  
7  
8 355 prolonged standing etc., in the household. In a US-based study, LBP was significantly  
9  
10 356 related to occupational factors such as truck driving, lifting, carrying, pulling, pushing,  
11  
12 357 twisting, and non-driving vibrational exposure<sup>54</sup>. In some European countries, workers  
13  
14 358 involved in heavy weightlifting ( $\geq 25$  kg) suffered more from LBP<sup>55</sup>.  
15  
16 359  
17 360 Studies reported associations between LBP and lower social class<sup>14 51</sup>, but we did not find any  
18  
19 361 significant association of LBP with economic status. This finding is coherent with a Danish  
20  
21 362 study that did not find any possible relationship between socioeconomic status and LBP<sup>56</sup>. In  
22  
23 363 our analysis, trauma tended to be associated (unadjusted OR) with overall LBP, but the  
24  
25 364 association was lost after adjustment. Trauma is not supposed to lead to chronic LBP, and  
26  
27 365 the persistence of back pain was more associated with psychological factors like stress, low  
28  
29 366 education status, etc., than the trauma itself<sup>57</sup>. We found a positive relationship between  
30  
31 367 hypertension and LBP. LBP may cause inactivity and lack of exercise resulting in weight  
32  
33 368 gain, subsequently creating or exaggerating co-morbid conditions like hypertension and  
34  
35 369 diabetes mellitus. The Hong Kong Disc Degeneration-Cardiovascular Cohort showed that  
36  
37 370 HTN increases the possibility of moderate or severe disc degeneration, which is highly  
38  
39 371 associated with LBP<sup>58</sup>. Another long-term Finish study revealed that both SBP and DBP  
40  
41 372 were positively associated with LBP suggesting atherosclerosis of lumbar vessels as a  
42  
43 373 possible mechanism of development of LBP<sup>59</sup>. In a Korean survey, the lifetime prevalence of  
44  
45 374 LBP was 34.4% among the hypertensive respondents, but the adjusted OR of LBP prevalence  
46  
47 375 was significantly lower than the normotensive subjects (fully adjusted 0.79, 95% CI 0.70-  
48  
49 376 0.90)<sup>60</sup>. A Bangladeshi study conducted among the doctors working in a tertiary care hospital  
50  
51 377 found that HTN was the most common co-morbid condition among the LBP sufferers<sup>61</sup>.  
52  
53 378 There was no association between diabetes and LBP in this study.  
54  
55 379

### 51 380 ***Strengths and Limitations***

52  
53 381 This is the first nationally representative survey report on LBP in Bangladesh and probably,  
54  
55 382 among all south Asian nations. Although we have weighted the data for national  
56  
57 383 representation, the sample size calculation for the original study was based on the point  
58  
59 384 prevalence of MSD<sup>19</sup>. We now know that the prevalence of LBP was 18.5%, and the  
60

1  
2  
3  
4 385 prevalence of MSD was 30.4%. A larger sample size maintaining adequate power was  
5  
6 386 needed for the generalizability of the study results. Therefore, a cautious interpretation is  
7  
8 387 necessary because of the inadequate sample size, especially when split into reporting  
9  
10 388 domains. We have operationally defined the recall period for reporting work loss days as 12  
11  
12 389 months which might induce bias. Trained rheumatology residents diagnosed the patients,  
13  
14 390 which the experienced rheumatologists verified in the field. Some diagnoses of evolving  
15  
16 391 rheumatological conditions might lack sufficient validity because of  
17  
18 392 inadequate laboratory facilities in the field.  
19

## 20 394 **CONCLUSION**

21 395 This nationally representative study reports the population-weighted prevalence of LBP by  
22  
23 396 sociodemographic background, co-morbidities and risk factors in Bangladesh. One in five  
24  
25 397 adults suffers from LBP. Education and hypertension are modifiable risk factors that warrant  
26  
27 398 intervention. An increase in the level of education, care for the middle and older population,  
28  
29 399 and good control of hypertension may reduce the LBP burden. Special attention is needed to  
30  
31 400 prevent LBP in women. Further study with a larger sample size addressing these neglected  
32  
33 401 issues may have more clarifications to decrease the burden of LBP.  
34  
35  
36  
37  
38  
39  
40  
41  
42  
43  
44  
45  
46  
47  
48  
49  
50  
51  
52  
53  
54  
55  
56  
57  
58  
59  
60

1  
2  
3  
4 **402 Abbreviations and acronyms:**  
5

---

|    |         |                                                               |
|----|---------|---------------------------------------------------------------|
| 6  | BMI     | Body mass index                                               |
| 7  |         |                                                               |
| 8  | BSMMU   | Bangabandhu Sheikh Mujib Medical University                   |
| 9  |         |                                                               |
| 10 | CI      | Confidence interval                                           |
| 11 |         |                                                               |
| 12 | COPCORD | Community oriented program from control of rheumatic diseases |
| 13 |         |                                                               |
| 14 | HAQ-DI  | Health Assessment Questionnaire - Disability Index            |
| 15 |         |                                                               |
| 16 | LBP     | Low back pain                                                 |
| 17 |         |                                                               |
| 18 | MSK     | Musculoskeletal                                               |
| 19 |         |                                                               |
| 20 | MSD     | Musculoskeletal disorder                                      |
| 21 |         |                                                               |
| 22 | OR      | Odds ratio                                                    |
| 23 |         |                                                               |
| 24 | PPS     | Population proportion to size                                 |
| 25 |         |                                                               |
| 26 | PSU     | Primary sampling unit                                         |
| 27 |         |                                                               |
| 28 | WHO     | World health organisation                                     |

---

29 **403**

30 **404 Acknowledgement:** We gratefully acknowledge the field team, divisional coordinators, civil  
31  
32 surgeons, upazila health and family planning officers and health assistants for their support.  
33

34 **406**

35  
36 **407 Author contribution:**

37 **408** Muhammad Shoaib Momen Majumder (MSMM): Conceptualised the area of work, and  
38 prepared the first draft of the manuscript and revised the subsequent drafts.  
39

40 **410** Ferdous Hakim (FH): analysed the data, guided preparation of graphs and tables, interpreted  
41 the results, revised the draft manuscript, and coordinated the writing exercise.  
42

43 **411** Iftexhar Hussain Bandhan (IHB): prepared graphs and tables, revised the draft manuscript.  
44

45 **412** Mohammad Abdur Razzaque (MAR): reviewed the manuscript and with special reference to  
46 the literature review.  
47

48 **414** Ahmed Zahid-Al-Quadir and Shamim Ahmed: Prepared the training manual, trained the field  
49 team, executed the field operation in coordination with the divisional investigators;  
50

51 **416** Minhaj R Choudhury, Syed Atiqul Haq and Mohammad Mostafa Zaman: Designed the study,  
52 guided the analysis and manuscript writing, critically reviewed the results and manuscript  
53

54 **417** Minhaj R Choudhury, Syed Atiqul Haq and Mohammad Mostafa Zaman: Designed the study,  
55 guided the analysis and manuscript writing, critically reviewed the results and manuscript  
56

57 **419** drafts, ensured integrity of data.  
58

59 **420** All authors: Approved publication.  
60

1  
2  
3  
4 421 **Funding:** Preparing this manuscript did not require any funding. However, the base study  
5  
6 422 was supported by the World Health Organization, Bangladesh (Agreement Reference:  
7  
8 423 SEBAN140895) back in 2015. As a part of its mandate to strengthen national research  
9  
10 424 capacity, WHO provided technical guidance in designing, implementing, analysing data, and  
11  
12 425 writing the report. However, it does not have any influence on the results.  
13

426

14 427 **Consent to publish:** All authors contributed to the manuscript and provided consent to  
15  
16 428 publish.  
17

429

18 430 **Availability of data and materials:** The dataset used for this manuscript is available with  
19  
20 431 the corresponding author upon reasonable request.  
21

432

22 433 **Disclosure of Conflicts of Interest:** None of the authors has any conflict of interest to  
23  
24 434 disclose. The authors alone are responsible for their views expressed in this article, which do  
25  
26 435 not necessarily represent the institutions' views, decisions, or policies with which they are  
27  
28 436 affiliated.  
29

437

30 438 **Ethical Publication Statement:** We confirm that we have read the Journal's position on  
31  
32 439 issues involved in ethical publication and affirm that this report is consistent with those  
33  
34 440 guidelines.  
35  
36  
37  
38

441



442 **Tables**

443

444

**Table 1. Characteristics of the respondents with LBP by unweighted and weighted numbers, Musculoskeletal Disease Survey 2015**

| Sociodemographic characteristics | Unweighted sample (n=1,843) | Weighted* sample (N=94,794,164) |
|----------------------------------|-----------------------------|---------------------------------|
|                                  | number (percent)            | number (percent)                |
| Total                            | 1843 (100.0)                | 94,794,164 (100.0)              |
| Sex                              |                             |                                 |
| Men                              | 892 (48.4)                  | 41,553,976 (43.8)               |
| Women                            | 951 (51.6)                  | 53,240,188 (56.2)               |
| Residence                        |                             |                                 |
| Urban                            | 716 (38.9)                  | 27,772,657 (29.3)               |
| Rural                            | 1127 (61.2)                 | 67,021,507 (70.7)               |
| Age, years                       |                             |                                 |
| 18-34                            | 711 (38.6)                  | 41,343,470 (43.6)               |
| 35-54                            | 774 (42.0)                  | 35,278,850 (37.2)               |
| 55-99                            | 358 (19.4)                  | 18,171,844 (19.2)               |

\* Weighted to projected population of Bangladesh from 2001 Population Census Frame of Bangladesh Bureau of Statistics.

445

446

447

**Table 2. Weighted prevalence of low back pain by sociodemographic characteristics in Bangladesh, Musculoskeletal Disease Survey 2015**

| Sociodemographic characteristics         | Total            | Men              | Women            |
|------------------------------------------|------------------|------------------|------------------|
|                                          | Percent (95% CI) | Percent (95% CI) |                  |
| Overall                                  | 18.5 (11.8–25.2) | 13.1 (6.4–19.9)  | 22.7 (15.3–30.2) |
| Overall (age-standardized)*              | 19.4 (14.0–24.8) | 14.0 (8.7–19.3)  | 27.2 (19.3–35.1) |
| Age in years                             |                  |                  |                  |
| 18-34                                    | 10.5 (5.7–15.4)  | 5.2 (1.3–9.0)    | 13.5 (7.2–19.9)  |
| 35-54                                    | 23.1 (15.3–30.9) | 18.8 (8.7–28.8)  | 26.7 (18.3–35.1) |
| 55-99                                    | 27.8 (16.1–39.5) | 15.7 (6.7–24.7)  | 44.5 (23.9–65.1) |
| Occupation                               |                  |                  |                  |
| Homemaker                                | 23.6 (15.9–31.2) | –                | 23.6 (15.9–31.2) |
| Laborer†                                 | 18.2 (9.4–27.0)  | 17.9 (8.6–27.3)  | 21.2 (6.2–36.3)  |
| Business professional                    | 9.6 (1.9–17.2)   | 9.8 (1.9–17.6)   | –                |
| Service holder                           | 10.7 (1.2–20.1)  | 10.3 (0.4–20.2)  | –                |
| Others‡                                  | 13.9 (4.1–23.6)  | 8.6 (1.7–15.5)   | 20.3 (6.0–34.6)  |
| Education                                |                  |                  |                  |
| No formal education (0)                  | 31.3 (22.3–40.4) | 20.3 (13.4–27.2) | 37.4 (24.3–50.5) |
| Any primary education (1-5)              | 13.3 (6.7–19.9)  | 12.1 (3.9–20.3)  | 14.4 (7.8–21.0)  |
| Any secondary education (6-10)           | 14.9 (7.4–22.3)  | 12.0 (2.4–21.6)  | 17.5 (9.9–25.0)  |
| Above secondary (≥11 years)              | 6.9 (3.8–10.1)   | –                | 8.0 (3.7–12.3)   |
| Married‡                                 | 19.6 (12.4–26.7) | 14.1 (6.7–21.4)  | 23.7 (15.7–31.7) |
| Wealth index quartile§                   |                  |                  |                  |
| 1st                                      | 23.5 (13.9–33.0) | 19.5 (11.2–27.8) | 25.5 (12.9–38.2) |
| 2nd                                      | 19.8 (8.4–31.2)  | 17.3 (3.7–30.9)  | 21.6 (10.3–32.9) |
| 3rd                                      | 14.1 (7.6–20.5)  | 8.3 (2.3–14.2)   | 19.8 (11.7–28.0) |
| 4th                                      | 16.6 (9.3–23.8)  | 10.3 (3.2–17.4)  | 23.1 (11.5–34.7) |
| Residence                                |                  |                  |                  |
| Urban                                    | 14.6 (9.1–20.0)  | 9.8 (3.9–15.6)   | 17.7 (8.5–26.8)  |
| Rural                                    | 20.2 (10.5–29.8) | 14.3 (4.8–23.9)  | 25.1 (14.7–35.4) |
| Strenuous physical activity <sup>l</sup> | 17.1 (4.3–29.8)  | 17.2 (4.0–30.4)  | –                |
| History of physical trauma               | 24.5 (14.2–34.7) | 24.6 (13.0–36.2) | 24.4 (7.9–40.9)  |

All values are percent (95% confidence interval). Weighted percentages shown are calculated from Census 2001 Population Frame by Bangladesh Bureau of Statistics to reflect projected population of Bangladesh (N=94,794,164).

Bold face values denote statistically significant higher prevalence in women compared to men.

\* Standardised for WHO World Population 2000-2020.

† Labourer includes: farmer, daily worker, rickshaw puller, garments worker, field worker and others.

Other occupations: retired, weaver and housekeeper

‡ Includes currently married, divorced, separated and widowed.

§ The wealth index was constructed using principal component analysis out of a list of 20 household assets (see Methods section for details);

<sup>l</sup> Fourth quartile of the MET-minutes distribution of work-related physical activity. Commutation and leisure time physical activities were not considered because these were negligible contributors.

– 95% confidence interval not reported as number of respondents are <25.

448

449

450

**Table 3. Socioeconomic characteristics of patients of low back pain in Bangladesh, Musculoskeletal Disease Survey 2015**

| Sociodemographic characteristics | Total                                         | Men               | Women             |
|----------------------------------|-----------------------------------------------|-------------------|-------------------|
|                                  | Weighted percentage (95% confidence interval) |                   |                   |
| Age in years                     |                                               |                   |                   |
| Mean (95% confidence interval)   | 45.3 (43.0–47.7)                              | 48.3 (45.8–50.9)  | 44.0 (41.0–47.0)  |
| 18–34                            | 24.8 (18.8–30.7)                              | 14.1 (6.9–21.3)   | 29.6 (21.3–37.9)  |
| 35–54                            | 46.4 (40.6–52.2)                              | 55.6 (40.3–70.9)  | 42.3 (34.4–50.2)  |
| 55–99                            | 28.8 (22.5–35.1)                              | 30.3 (17.0–43.7)  | 28.1 (22.2–34.0)  |
| Occupation                       |                                               |                   |                   |
| Homemaker                        | 57.4 (48.2–66.6)                              | –                 | 83.2 (72.0–94.5)  |
| Laborer†                         | 20.4 (13.6–27.2)                              | 59.7 (38.8–80.5)  | 2.7 (0.1–5.4)     |
| Business professional            | 5.2 (1.2–9.1)                                 | 16.6 (5.0–28.2)   | –                 |
| Service holder                   | –                                             | –                 | –                 |
| Others‡                          | 13.5 (2.7–24.3)                               | 14.8 (2.8–26.8)   | 13.0 (1.5–24.4)   |
| Education                        |                                               |                   |                   |
| No formal education (0)          | 53.2 (41.6–64.9)                              | 39.1 (24.3–54.0)  | 59.6 (46.9–72.3)  |
| Any primary education (1-5)      | 17.2 (13.8–20.5)                              | 23.9 (17.1–42.6)  | 14.1 (10.1–18.1)  |
| Any secondary education (6-10)   | 24.1 (15.9–32.4)                              | 29.9 (17.1–42.6)  | 21.6 (13.1–30.1)  |
| Above secondary (≥11 years)      | 5.5 (1.0–9.9)                                 | –                 | –                 |
| Married‡                         | 97.8 (94.8–100.8)                             | 96.8 (92.2–101.3) | 98.3 (95.5–101.1) |
| Wealth index quartile§           |                                               |                   |                   |
| 1st                              | 33.2 (22.6–43.9)                              | 30.1 (18.8–41.4)  | 34.7 (21.7–47.7)  |
| 2nd                              | 25.5 (14.8–36.2)                              | 29.5 (11.5–47.5)  | 23.7 (14.6–32.7)  |
| 3rd                              | 19.7 (11.0–28.4)                              | 18.5 (6.7–30.3)   | 20.3 (10.5–30.1)  |
| 4th                              | 21.6 (9.2–33.9)                               | 21.9 (9.4–34.5)   | 21.4 (7.1–35.7)   |
| Rural residence                  | 77.0 (55.9–98.0)                              | 80.3 (60.2–100.4) | 75.5 (52.8–98.1)  |

\* All values are percent (95% confidence interval) unless stated otherwise. Weighted percentages shown are calculated from Census 2001 Population Frame by Bangladesh Bureau of Statistics to reflect projected population of Bangladesh (N=94,794,164).

† Labourer include: farmer, daily worker, rickshaw puller, garments worker, field worker and others. Other occupations: retired, weaver and housekeeper etc.

‡ Includes currently married, divorced, separated and widowed.

§ The wealth index was constructed using principal component analysis out of a list of 20 household assets (see Methods section for details);

- numbers are low

451

452

**Table 4: Odds ratios of risk factors for low back pain compared with no musculoskeletal disorders in Bangladeshi adults, Musculoskeletal Disease Survey 2015**

| Factors                                                                 | Odds ratio (95% confidence interval) |                        |
|-------------------------------------------------------------------------|--------------------------------------|------------------------|
|                                                                         | Unadjusted                           | Adjusted               |
| Age group, years<br>(35–99=1, 18–34=0)                                  | 3.2 (2.5–4.2)**<br>1.0               | 2.4 (1.7–3.4)**<br>1.0 |
| Sex<br>(woman=1, man=0)                                                 | 2.1 (1.3–3.3)**<br>1.0               | 2.2 (1.5–3.3)**<br>1.0 |
| Labourer†<br>(yes=1, no=0)                                              | 0.9 (0.7–1.3)<br>1.0                 | -<br>-                 |
| No formal education<br>(yes=1, no=0)                                    | 3.5 (2.5–5.0)**<br>1.0               | 2.3 (1.6–3.3)**<br>1.0 |
| Low wealth index<br>(yes=1, no=0)                                       | 1.6 (1.1–2.3)**<br>1.0               | 1.0 (0.6–1.5)<br>1.0   |
| Strenuous physical activity‡<br>(yes=1, no=0)                           | 0.8 (0.4–1.6)<br>1.0                 | -<br>-                 |
| Obesity (body mass index $\geq 25$ Kg/m <sup>2</sup> )<br>(yes=1, no=0) | 1.3 (0.8–2.1)<br>1.0                 | -<br>-                 |
| History of physical trauma<br>(yes=1, no=0)                             | 1.8 (1.1–3.2)*<br>1.0                | 1.6 (0.9–2.8)<br>1.0   |
| Current tobacco user<br>(yes=1, no=0)                                   | 1.1 (0.8–1.6)<br>1.0                 | -<br>-                 |
| Hypertension<br>(yes=1, no=0)                                           | 2.3 (1.3–4.0)**<br>1.0               | 1.7 (1.1–2.6)*<br>1.0  |
| Diabetes mellitus<br>(yes=1, no=0)                                      | 1.0 (0.5–1.7)<br>1.0                 | -<br>-                 |

LBP: low back pain; MSD: musculoskeletal disorder

\*  $P < 0.05$ , \*\*  $P < 0.01$ 

† Labourer includes: farmer, daily worker, rickshaw puller, garments worker, field worker and others.

‡ Fourth quartile of the MET-minutes distribution of work-related physical activity. Commutation and leisure time physical activities were not considered because these were negligible contributors.

453

1  
2  
3  
4 **454 Figures**  
5

6 **455 Fig. 1 Flow chart on the selection of low back pain patients from the national survey on**  
7 **456 musculoskeletal conditions in Bangladesh (2015) adapted from Ahmad Zahid-Al-**  
8 **457 Quadir *et al*<sup>21</sup>**  
9

10 **458**  
11 **459** \* Eight divisions from Sept 2015. Randomly 15 districts were selected out of 64.

12 **460** \*\* PPS indicates population proportion to size.

13 **461** \*\*\* Out-migration, broken house, locked house, no tenant, out of home, refusal. Two recall visits were done if  
14 **462** the selected house was locked and the person chosen was not available at home at the time of the interviewer's  
15 **463** visit. In case of non-participation after the second recall visit, the targeted household/individual was declared  
16 **464** non-respondents.

17 **465**

18 **466**

19 **467**

20 **468**

21 **469**  
22  
23  
24  
25  
26  
27  
28  
29  
30  
31  
32  
33  
34  
35  
36  
37  
38  
39  
40  
41  
42  
43  
44  
45  
46  
47  
48  
49  
50  
51  
52  
53  
54  
55  
56  
57  
58  
59  
60

1  
2  
3  
4 **470 Fig. 2 Prevalence of LBP in different (Unadjusted overall prevalence (percent, 95%**  
5 **confidence interval) of low back pain and in) associated co-conditions (n=343)**  
6 **471**  
7 **472**

9 \*Diabetes was defined as random capillary glucose level  $\geq 11.1$  or on medication for diabetes

10 †Obesity is defined as, body mass index  $\geq 25$  kg/m<sup>2</sup>;

11 ‡Hypertension was defined as systolic blood pressure  $\geq 140$  or diastolic blood pressure  $\geq 90$  or medication for  
12 hypertension;

13 **473**

14 **474**

15  
16  
17  
18  
19  
20  
21  
22  
23  
24  
25  
26  
27  
28  
29  
30  
31  
32  
33  
34  
35  
36  
37  
38  
39  
40  
41  
42  
43  
44  
45  
46  
47  
48  
49  
50  
51  
52  
53  
54  
55  
56  
57  
58  
59  
60

DR  
For peer review only

475 **References**

---

- <sup>1</sup> Hoy D, Bain C, Williams G, et al. A systematic review of the global prevalence of low back pain. *Arthritis Rheum*. 2012 Jun;64(6):2028-37. doi: 10.1002/art.34347.
- <sup>2</sup> Dionne CE, Dunn KM, Croft PR, et al. A consensus approach toward the standardization of back pain definitions for use in prevalence studies. *Spine (Phila Pa 1976)*. 2008 Jan 1;33(1):95-103. doi: 10.1097/BRS.0b013e31815e7f94.
- <sup>3</sup> Deyo RA, Tsui-Wu YJ. Descriptive epidemiology of low-back pain and its related medical care in the United States. *Spine (Phila Pa 1976)*. 1987 Apr;12(3):264-8. doi: 10.1097/00007632-198704000-00013.
- <sup>4</sup> Balagué F, Mannion AF, Pellisé F, et al. Non-specific low back pain. *Lancet*. 2012 Feb 4;379(9814):482-91. doi: 10.1016/S0140-6736(11)60610-7.
- <sup>5</sup> Andersson GB. Epidemiological features of chronic low-back pain. *Lancet*. 1999 Aug 14;354(9178):581-5. doi: 10.1016/S0140-6736(99)01312-4.
- <sup>6</sup> Fatoye F, Gebrye T, Odeyemi I. Real-world incidence and prevalence of low back pain using routinely collected data. *Rheumatol Int*. 2019 Apr;39(4):619-626. doi: 10.1007/s00296-019-04273-0.
- <sup>7</sup> Hartvigsen J, Hancock MJ, Kongsted A, et al. Lancet Low Back Pain Series Working Group. What low back pain is and why we need to pay attention. *Lancet*. 2018 Jun 9;391(10137):2356-2367. doi: 10.1016/S0140-6736(18)30480-X.
- <sup>8</sup> Parreira P, Maher CG, Steffens D, et al. Risk factors for low back pain and sciatica: an umbrella review. *Spine J*. 2018 Sep;18(9):1715-1721. doi: 10.1016/j.spinee.2018.05.018.
- <sup>9</sup> Lötters F, Burdorf A. Prognostic factors for duration of sickness absence due to musculoskeletal disorders. *The Clinical Journal of Pain*. 2006 Feb;22(2):212-221. DOI: 10.1097/01.ajp.0000154047.30155.72.

- 1  
2  
3  
4  
5  
6  
7  
8  
9  
10  
11  
12  
13  
14  
15  
16  
17  
18  
19  
20  
21  
22  
23  
24  
25  
26  
27  
28  
29  
30  
31  
32  
33  
34  
35  
36  
37  
38  
39  
40  
41  
42  
43  
44  
45  
46  
47  
48  
49  
50  
51  
52  
53  
54  
55  
56  
57  
58  
59  
60
- 
- <sup>10</sup> Guo HR, Tanaka S, Halperin WE, et al. Back pain prevalence in US industry and estimates of lost workdays. *Am J Public Health*. 1999 Jul;89(7):1029-35. doi: 10.2105/ajph.89.7.1029.
- <sup>11</sup> Cassidy JD, Carroll LJ, Côté P. The Saskatchewan health and back pain survey. The prevalence of low back pain and related disability in Saskatchewan adults. *Spine*. 1998 Sep 1;23(17):1860-6; discussion 1867. doi: 10.1097/00007632-199809010-00012.
- <sup>12</sup> Harreby M, Kjer J, Hesselsøe G, Neergaard K. Epidemiological aspects and risk factors for low back pain in 38-year-old men and women: a 25-year prospective cohort study of 640 school children. *Eur Spine J*. 1996;5(5):312-8. doi: 10.1007/BF00304346.
- <sup>13</sup> Waxman R, Tennant A, Helliwell P. A prospective follow-up study of low back pain in the community. *Spine*. 2000 Aug 15;25(16):2085-90. doi: 10.1097/00007632-200008150-00013.
- <sup>14</sup> Biglarian A, Seifi B, Bakhshi E, et al. Low back pain prevalence and associated factors in Iranian population: findings from the national health survey. *Pain Res Treat*. 2012;2012:653060. doi: 10.1155/2012/653060.
- <sup>15</sup> Gupta G, Nandini N. Prevalence of low back pain in non working rural housewives of Kanpur, India. *Int J Occup Med Environ Health*. 2015;28(2):313-20. doi: 10.13075/ijomh.1896.00299.
- <sup>16</sup> Ahdhi GS, Subramanian R, Saya GK, et al. Prevalence of low back pain and its relation to quality of life and disability among women in rural areas of Puducherry, India. *Indian J Pain* [serial online] 2016 [cited 2021 Apr 18];30:111-5. Available from: <https://www.indianjpain.org/text.asp?2016/30/2/111/186467>.
- <sup>17</sup> Bansal D, Asrar MM, Ghai B, et al. Prevalence and Impact of Low Back Pain in a Community-Based Population in Northern India. *Pain Physician*. 2020;23(4):E389-E98.
- <sup>18</sup> Haq SA, Darmawan J, Islam MN, et al. Prevalence of rheumatic diseases and associated outcomes in rural and urban communities in Bangladesh: a COPCORD study. *J Rheumatol*. 2005 Feb;32(2):348-53. PMID: 15693098.



- 1  
2  
3  
4  
5  
6  
7  
8  
9  
10  
11  
12  
13  
14  
15  
16  
17  
18  
19  
20  
21  
22  
23  
24  
25  
26  
27  
28  
29  
30  
31  
32  
33  
34  
35  
36  
37  
38  
39  
40  
41  
42  
43  
44  
45  
46  
47  
48  
49  
50  
51  
52  
53  
54  
55  
56  
57  
58  
59  
60
- 
- <sup>19</sup> Zahid-Al-Quadir, A., Zaman, M.M., Ahmed, S. et al. Prevalence of musculoskeletal conditions and related disabilities in Bangladeshi adults: a cross-sectional national survey. *BMC Rheumatol* 4, 69 (2020). <https://doi.org/10.1186/s41927-020-00169-w>
- <sup>20</sup> Bangladesh Bureau of Statistics. Population and housing census 2001, preliminary result. Dhaka: Bangladesh Bureau of Statistics; 2001. Accessed 20 Apr 2020. <http://bbs.portal.gov.bd>.
- <sup>21</sup> Islam, ME, Ahmed, S, Shahin, MA, et al. Cross-cultural adaptation and validation of revised WHO-ILAR-COPCORD core English questionnaire translated to Bangla. *Int J Rheum Dis*. 2021; 00: 1– 14. <https://doi.org/10.1111/1756-185X.14176>
- <sup>22</sup> Beaton DE, Bombardier C, Guillemin F, Ferraz MB. Guidelines for the process of cross-cultural adaptation of self-report measures. *Spine (Phila Pa 1976)*. 2000 Dec 15;25(24):3186-91. doi: 10.1097/00007632-200012150-00014.
- <sup>23</sup> Chassany O, Marquis P, Scherrer B, Read NW, Finger T, Bergmann JF, Fraitag B, Geneve J, Caulin C. Validation of a specific quality of life questionnaire for functional digestive disorders. *Gut*. 1999 Apr;44(4):527-33. doi: 10.1136/gut.44.4.527.
- <sup>24</sup> van Tulder M, Becker A, Bekkering T, et al. COST B13 Working Group on Guidelines for the Management of Acute Low Back Pain in Primary Care. Chapter 3. European guidelines for the management of acute nonspecific low back pain in primary care. *Eur Spine J*. 2006 Mar;15 Suppl 2(Suppl 2):S169-91. doi: 10.1007/s00586-006-1071-2.
- <sup>25</sup> Zaman MM, Rahman MM, Rahman MR, et al. Prevalence of risk factors for non-communicable diseases in Bangladesh: Results from STEPS survey 2010. *Indian J Public Health*. 2016 Jan-Mar;60(1):17-25. doi: 10.4103/0019-557X.177290.
- <sup>26</sup> Islam N, Baron Basak T, OudeVoshaar MA, et al. Cross-cultural adaptation and validation of a Bengali Health Assessment Questionnaire for use in rheumatoid arthritis patients. *Int J Rheum Dis*. 2013 Aug;16(4):413-7. doi: 10.1111/1756-185X.12032.

- 1  
2  
3  
4  
5  
6  
7  
8  
9  
10  
11  
12  
13  
14  
15  
16  
17  
18  
19  
20  
21  
22  
23  
24  
25  
26  
27  
28  
29  
30  
31  
32  
33  
34  
35  
36  
37  
38  
39  
40  
41  
42  
43  
44  
45  
46  
47  
48  
49  
50  
51  
52  
53  
54  
55  
56  
57  
58  
59  
60
- 
- <sup>27</sup> Misra A. Ethnic-Specific Criteria for Classification of Body Mass Index: A Perspective for Asian Indians and American Diabetes Association Position Statement. *Diabetes Technol Ther.* 2015 Sep;17(9):667-71. doi: 10.1089/dia.2015.0007.
- <sup>28</sup> Hakim, F., Bhuiyan, R., Akter, M. K., Mohit, M. A., Alam, M. F., Karim, M. R., & Zaman, M. M. (2022). Weighting National Survey Data in Bangladesh: Why, How and Which weight? *Weighting survey data. Bangladesh Medical Research Council Bulletin*, 47(2), 118–126. <https://doi.org/10.3329/bmrcb.v47i2.57769>
- <sup>29</sup> Ahmad OB, Boschi-Pinto C, Lopez AD, et al. Age Standardization of Rates: A New WHO Standard. GPE Discussion Paper Series: No31 Geneva, Switzerland: World Health Organization, 2001.
- <sup>30</sup> WMA Declaration of Helsinki - ethical principles for medical research involving human respondents. [Cited on: 2020 Aug 29] Available from: <https://www.wma.net/policies-post/wma-declaration-of-helsinki-ethical-principlesfor-medical-research-involving-human-respondents/>.
- <sup>31</sup> Dutmer AL, Schiphorst Preuper HR, Soer R, et al. Personal and Societal Impact of Low Back Pain: The Groningen Spine Cohort. *Spine (Phila Pa 1976)*. 2019 Dec 15;44(24):E1443-E1451. doi: 10.1097/BRS.0000000000003174.
- <sup>32</sup> Al-Awadhi AM, Olusi SO, Al-Saeid K, et al. Incidence of musculoskeletal pain in adult Kuwaitis using the validated Arabic version of the WHO-ILAR COPCORD Core Questionnaire. *Annals of Saudi Medicine*. 2005 Nov-Dec;25(6):459-462. DOI: 10.5144/0256-4947.2005.459.
- <sup>33</sup> Aldeen Sarakbi H, Alsaed O, Hammoudeh M, et al.. Epidemiology of musculoskeletal complaints and diseases in Qatar: A cross-sectional study. *Qatar Med J*. 2020 Nov 12;2020(2):29. doi: 10.5339/qmj.2020.29.

- 1  
2  
3  
4  
5  
6  
7  
8  
9  
10  
11  
12  
13  
14  
15  
16  
17  
18  
19  
20  
21  
22  
23  
24  
25  
26  
27  
28  
29  
30  
31  
32  
33  
34  
35  
36  
37  
38  
39  
40  
41  
42  
43  
44  
45  
46  
47  
48  
49  
50  
51  
52  
53  
54  
55  
56  
57  
58  
59  
60
- 
- <sup>34</sup> Bansal D, Asrar MM, Ghai B, et al. Prevalence and Impact of Low Back Pain in a Community-Based Population in Northern India. *Pain Physician*. 2020 Jul;23(4):E389-E398. PMID: 32709185.
- <sup>35</sup> Veerapen K, Wigley RD, Valkenburg H. Musculoskeletal pain in Malaysia: a COPCORD survey. *J Rheumatol*. 2007 Jan;34(1):207-13. PMID: 17216688.
- <sup>36</sup> Sany SA, Tanjim T and Hossain MI. Low back pain and associated risk factors among medical students in Bangladesh: a cross-sectional study. *F1000Research*. 2021 July; 10:698. Doi: 10.12688/f1000research.55151.1.
- <sup>37</sup> Ali M, Ahsan GU, Hossain A. Prevalence and associated occupational factors of low back pain among the bank employees in Dhaka City. *J Occup Health*. 2020 Jan; 62(1):e12131. doi: 10.1002/1348-9585.12131.
- <sup>38</sup> Mondal R, Sarker RC, Akter S, Banik PC, Baroi SK. Prevalence of low back pain and its associated factors among physiotherapists in Dhaka city of Bangladesh in 2016. *Journal of Occupational Health and Epidemiology*. 2018. 7:70–4. Doi: 10.29252/johe.7.2.70.
- <sup>39</sup> GBD 2017 Disease and Injury Incidence and Prevalence Collaborators. Global, regional, and national incidence, prevalence, and years lived with disability for 354 diseases and injuries for 195 countries and territories, 1990-2017: a systematic analysis for the Global Burden of Disease Study 2017. *Lancet*. 2018 Nov 10;392(10159):1789-1858. doi: 10.1016/S0140-6736(18)32279-7.
- <sup>40</sup> Hoy D, Brooks P, Blyth F, et al. The Epidemiology of low back pain. *Best Practice & Research Clinical Rheumatology*. 2010 Dec;24(6):769–81. doi: 10.1016/j.berh.2010.10.002.
- <sup>41</sup> Loney PL, Stratford PW. The prevalence of low back pain in adults: a methodological review of the literature. *Phys Ther*. 1999 Apr;79(4):384-96. PMID: 10201544.
- <sup>42</sup> Manogharan S, Kongsted A, Ferreira ML, et al. Do older adults with chronic low back pain differ from younger adults in regards to baseline characteristics and prognosis? *Eur J Pain (United Kingdom)*. 2017;21(5):866–73.

- 1  
2  
3  
4  
5  
6  
7  
8  
9  
10  
11  
12  
13  
14  
15  
16  
17  
18  
19  
20  
21  
22  
23  
24  
25  
26  
27  
28  
29  
30  
31  
32  
33  
34  
35  
36  
37  
38  
39  
40  
41  
42  
43  
44  
45  
46  
47  
48  
49  
50  
51  
52  
53  
54  
55  
56  
57  
58  
59  
60
- 
- <sup>43</sup> Ganesan S, Acharya AS, Chauhan R, Acharya S. Prevalence and Risk Factors for Low Back Pain in 1,355 Young Adults: A Cross-Sectional Study. *Asian Spine J.* 2017 Aug;11(4):610-617. doi: 10.4184/asj.2017.11.4.610.
- <sup>44</sup> Yue P, Liu F, Li L. Neck/shoulder pain and low back pain among school teachers in China, prevalence and risk factors. *BMC Public Health.* 2012 Sep 14;12(1). doi: 10.1186/1471-2458-12-789.
- <sup>45</sup> Craft RM, Mogil JS, Aloisi AM. Sex differences in pain and analgesia: the role of gonadal hormones. *European Journal of Pain.* 2004 Oct;8(5):397–411. doi: 10.1016/j.ejpain.2004.01.003
- <sup>46</sup> Berkley KJ. Sex differences in pain. *Behav Brain Sci.* 1997 Sep;20(3):371–80. doi: 10.1017/s0140525x97221485.
- <sup>47</sup> Keogh E. Sex Differences in Pain. *Reviews in Pain.* 2008 Dec;2(2):4–7. doi: 10.1177/204946370800200203.
- <sup>48</sup> Leboeuf-Yde C. Body Weight and Low Back Pain. *Spine.* 2000 Jan;25(2):226. doi: 10.1097/00007632-200001150-00015.
- <sup>49</sup> Webb R, Brammah T, Lunt M, et al. Prevalence and Predictors of Intense, Chronic, and Disabling Neck and Back Pain in the UK General Population. *Spine.* 2003 Jun;28(11):1195–202. doi: 10.1097/01.BRS.0000067430.49169.01.
- <sup>50</sup> Koyanagi A, Stickley A, Garin N, Miret M, Ayuso-Mateos JL, Leonardi M, Koskinen S, Galas A, Haro JM. The association between obesity and back pain in nine countries: a cross-sectional study. *BMC Public Health.* 2015 Feb 11;15:123. doi: 10.1186/s12889-015-1362-9.
- <sup>51</sup> Shmagel A, Foley R, Ibrahim H. Epidemiology of Chronic Low Back Pain in US Adults: Data From the 2009-2010 National Health and Nutrition Examination Survey. *Arthritis Care & Research.* 2016 Oct 26;68(11):1688–94. doi: 10.1002/acr.22890.

- 1  
2  
3  
4  
5  
6  
7  
8  
9  
10  
11  
12  
13  
14  
15  
16  
17  
18  
19  
20  
21  
22  
23  
24  
25  
26  
27  
28  
29  
30  
31  
32  
33  
34  
35  
36  
37  
38  
39  
40  
41  
42  
43  
44  
45  
46  
47  
48  
49  
50  
51  
52  
53  
54  
55  
56  
57  
58  
59  
60
- 
- <sup>52</sup> Deyo RA, Tsui-wu YJ. Descriptive Epidemiology of Low-back Pain and Its Related Medical Care in the United States. *Spine*. 1987 Apr;12(3):264–8. doi: 10.1097/00007632-198704000-00013.
- <sup>53</sup> Rubin DI. Epidemiology and Risk Factors for Spine Pain. *Neurologic Clinics*. 2007 May;25(2):353–71. doi: 10.1016/j.ncl.2007.01.004.
- <sup>54</sup> Frymoyer JW, Pope MH, Costanza MC, et al. Epidemiologic Studies of Low-Back Pain. *Spine*. 1980 Sep;5(5):419–23. doi: 10.1097/00007632-198009000-00005.
- <sup>55</sup> Coggon D, Ntani G, Palmer KT, et al. Drivers of international variation in prevalence of disabling low back pain: Findings from the Cultural and Psychosocial Influences on Disability study. *European journal of pain*. 2018 Jun 27;23(1):35–45. doi: 10.1002/ejp.1255.
- <sup>56</sup> Hestbaek L, Korsholm L, Leboeuf-Yde C, Kyvik KO. Does socioeconomic status in adolescence predict low back pain in adulthood? A repeated cross-sectional study of 4,771 Danish adolescents. *Eur Spine J*. 2008 Dec;17(12):1727-34. doi: 10.1007/s00586-008-0796-5.
- <sup>57</sup> Harris IA, Young JM, Rae H, et al. Factors associated with back pain after physical injury: a survey of consecutive major trauma patients. *Spine (Phila Pa 1976)*. 2007 Jun 15;32(14):1561-5. doi: 10.1097/BRS.0b013e318067dce8.
- <sup>58</sup> Samartzis D, Bow C, Karppinen J, Luk KDK, Cheung BMY, Cheung KMC. Hypertension is Independently Associated with Lumbar Disc Degeneration: A Large-Scale Population-Based Study. *Global Spine Journal*, vol. 4, no. 1\_suppl, May 2014, p. s-0034-1376579-s-0034-1376579. doi:10.1055/s-0034-1376579.
- <sup>59</sup> Leino-Arjas P, Solovieva S, Kirjonen J, Reunanen A, Riihimäki H. Cardiovascular risk factors and low-back pain in a long-term follow-up of industrial employees. *Scand J Work Environ Health*. 2006 Feb;32(1):12-9. doi: 10.5271/sjweh.971.

1  
2  
3  
4  
5  
6  
7  
8  
9  
10  
11  
12  
13  
14  
15  
16  
17  
18  
19  
20  
21  
22  
23  
24  
25  
26  
27  
28  
29  
30  
31  
32  
33  
34  
35  
36  
37  
38  
39  
40  
41  
42  
43  
44  
45  
46  
47  
48  
49  
50  
51  
52  
53  
54  
55  
56  
57  
58  
59  
60

---

<sup>60</sup> Bae Y-H, Shin J-S, Lee J, et al. Association between Hypertension and the Prevalence of Low Back Pain and Osteoarthritis in Koreans: A Cross-Sectional Study. Fuchs FD, editor. PLoS ONE. 2015 Sep 22;10(9):e0138790. doi: 10.1371/journal.pone.0138790.

<sup>61</sup> Rahman MA, Khan MA, Akter MR, Islam MA, Khan MK. Proportion of Low Back Pain among Physicians Working in a Tertiary Level Hospital of Bangladesh. Mymensingh Medical Journal: MMJ. 2021 Apr 1;30(2):262-6. PMID: 33830101

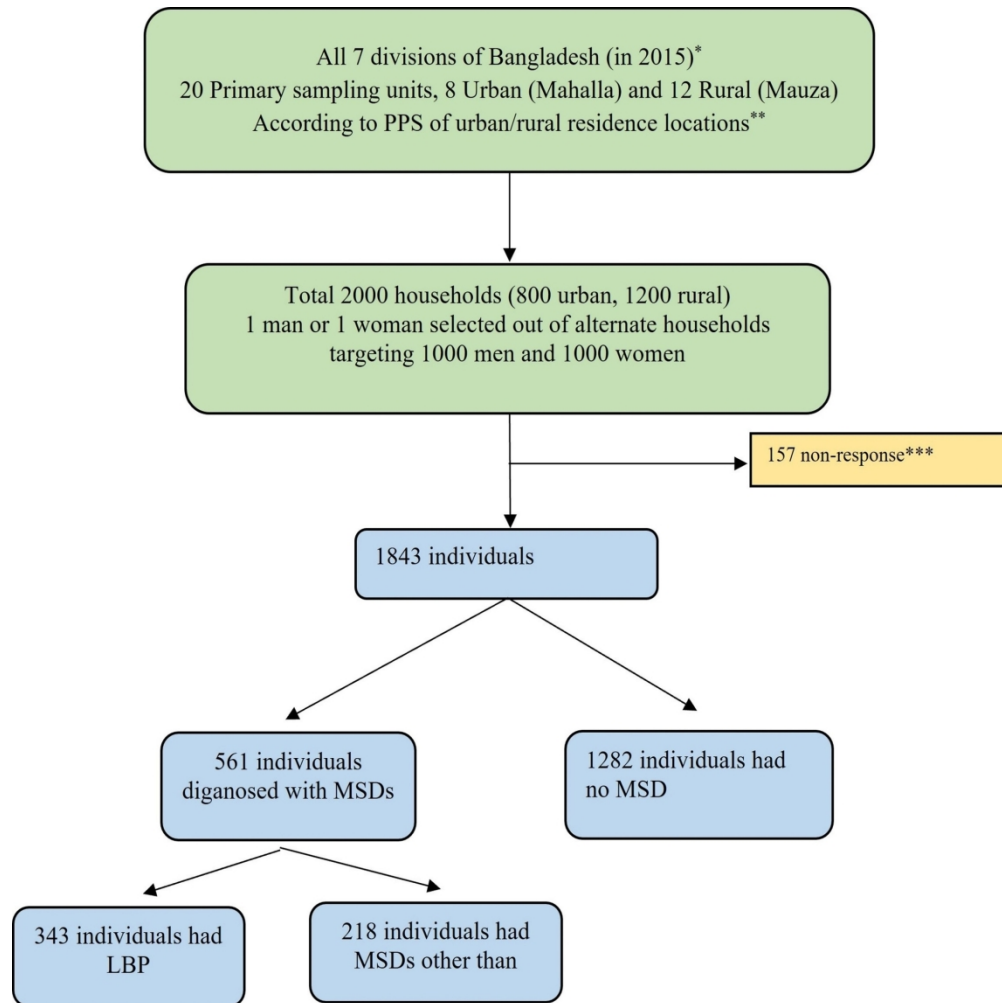

Caption:

Fig. 1 Flow chart on the selection of low back pain patients from the national survey on musculoskeletal conditions in Bangladesh (2015) adapted from Ahmad Zahid-Al-Quadir et al 21

Legend:

\* Eight divisions from Sept 2015. Randomly 15 districts were selected out of 64.

\*\* PPS indicates population proportion to size.

\*\*\* Out-migration, broken house, locked house, no tenant, out of home, refusal. Two recall visits were done if the selected house was locked and the person chosen was not available at home at the time of the interviewer's visit. In case of non-participation after the second recall visit, the targeted household/individual was declared non-respondents.

190x190mm (300 x 300 DPI)

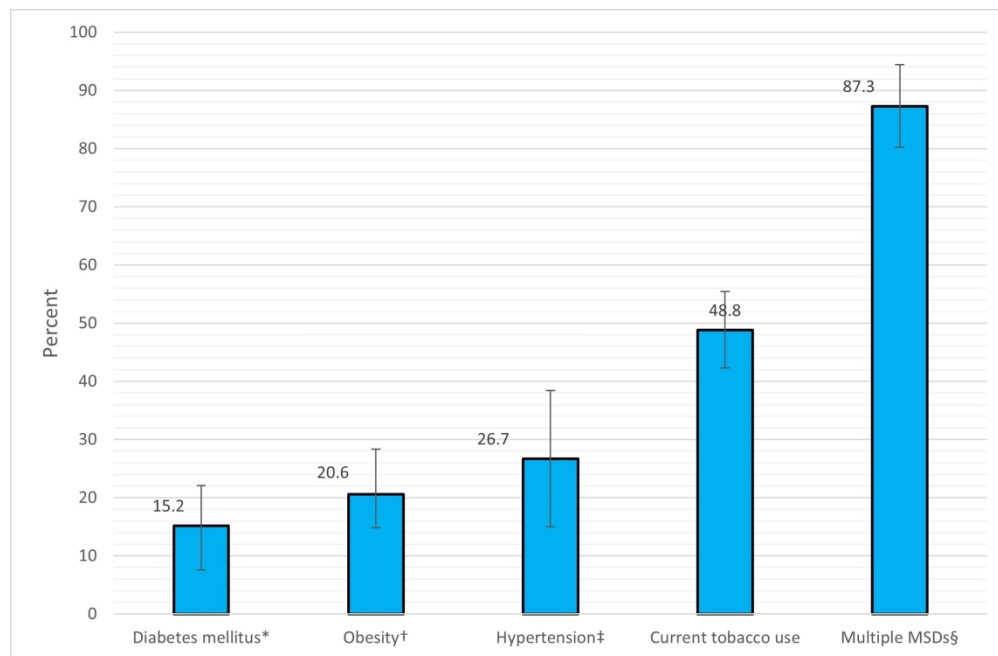

Caption:

Fig. 2 Prevalence of LBP in different (Unadjusted overall prevalence (percent, 95% confidence interval) of low back pain and in) associated co-conditions (n=343)

Legend:

\*Diabetes was defined as random capillary glucose level  $\geq 11.1$  or on medication for diabetes

†Obesity is defined as, body mass index  $\geq 25$  kg/m<sup>2</sup>;

‡Hypertension was defined as systolic blood pressure  $\geq 140$  or diastolic blood pressure  $\geq 90$  or medication for hypertension

597x389mm (300 x 300 DPI)



**STROBE 2007 (v4) Statement—Checklist of items that should be included in reports of *cross-sectional studies***

| Section/Topic                | Item # | Recommendation                                                                                                                                                                       | Reported on page # |
|------------------------------|--------|--------------------------------------------------------------------------------------------------------------------------------------------------------------------------------------|--------------------|
| <b>Title and abstract</b>    | 1      | (a) Indicate the study's design with a commonly used term in the title or the abstract                                                                                               | 1                  |
|                              |        | (b) Provide in the abstract an informative and balanced summary of what was done and what was found                                                                                  | 2                  |
| <b>Introduction</b>          |        |                                                                                                                                                                                      |                    |
| Background/rationale         | 2      | Explain the scientific background and rationale for the investigation being reported                                                                                                 | 4, 5               |
| Objectives                   | 3      | State specific objectives, including any prespecified hypotheses                                                                                                                     | 5                  |
| <b>Methods</b>               |        |                                                                                                                                                                                      |                    |
| Study design                 | 4      | Present key elements of study design early in the paper                                                                                                                              | 5                  |
| Setting                      | 5      | Describe the setting, locations, and relevant dates, including periods of recruitment, exposure, follow-up, and data collection                                                      | 5, 6               |
| Participants                 | 6      | (a) Give the eligibility criteria, and the sources and methods of selection of participants                                                                                          | 5                  |
| Variables                    | 7      | Clearly define all outcomes, exposures, predictors, potential confounders, and effect modifiers. Give diagnostic criteria, if applicable                                             | 6                  |
| Data sources/<br>measurement | 8*     | For each variable of interest, give sources of data and details of methods of assessment (measurement). Describe comparability of assessment methods if there is more than one group | 5, 6               |
| Bias                         | 9      | Describe any efforts to address potential sources of bias                                                                                                                            | 5, 6               |
| Study size                   | 10     | Explain how the study size was arrived at                                                                                                                                            | 5                  |
| Quantitative variables       | 11     | Explain how quantitative variables were handled in the analyses. If applicable, describe which groupings were chosen and why                                                         | 6                  |
| Statistical methods          | 12     | (a) Describe all statistical methods, including those used to control for confounding                                                                                                | 7                  |
|                              |        | (b) Describe any methods used to examine subgroups and interactions                                                                                                                  | 7                  |
|                              |        | (c) Explain how missing data were addressed                                                                                                                                          | 7                  |
|                              |        | (d) If applicable, describe analytical methods taking account of sampling strategy                                                                                                   | 7                  |
|                              |        | (e) Describe any sensitivity analyses                                                                                                                                                | Not applicable     |
| <b>Results</b>               |        |                                                                                                                                                                                      |                    |

|                          |     |                                                                                                                                                                                                              |                |
|--------------------------|-----|--------------------------------------------------------------------------------------------------------------------------------------------------------------------------------------------------------------|----------------|
| Participants             | 13* | (a) Report numbers of individuals at each stage of study—eg numbers potentially eligible, examined for eligibility, confirmed eligible, included in the study, completing follow-up, and analysed            | 5, 22          |
|                          |     | (b) Give reasons for non-participation at each stage                                                                                                                                                         | 19             |
|                          |     | (c) Consider use of a flow diagram                                                                                                                                                                           | 19             |
| Descriptive data         | 14* | (a) Give characteristics of study participants (eg demographic, clinical, social) and information on exposures and potential confounders                                                                     | 7, 8           |
|                          |     | (b) Indicate number of participants with missing data for each variable of interest                                                                                                                          | Not applicable |
| Outcome data             | 15* | Report numbers of outcome events or summary measures                                                                                                                                                         | 8, 9           |
| Main results             | 16  | (a) Give unadjusted estimates and, if applicable, confounder-adjusted estimates and their precision (eg, 95% confidence interval). Make clear which confounders were adjusted for and why they were included | 9              |
|                          |     | (b) Report category boundaries when continuous variables were categorized                                                                                                                                    | 6              |
|                          |     | (c) If relevant, consider translating estimates of relative risk into absolute risk for a meaningful time period                                                                                             | Not applicable |
| Other analyses           | 17  | Report other analyses done—eg analyses of subgroups and interactions, and sensitivity analyses                                                                                                               | Not applicable |
| <b>Discussion</b>        |     |                                                                                                                                                                                                              |                |
| Key results              | 18  | Summarise key results with reference to study objectives                                                                                                                                                     | 10             |
| Limitations              | 19  | Discuss limitations of the study, taking into account sources of potential bias or imprecision. Discuss both direction and magnitude of any potential bias                                                   | 3              |
| Interpretation           | 20  | Give a cautious overall interpretation of results considering objectives, limitations, multiplicity of analyses, results from similar studies, and other relevant evidence                                   | 11, 12         |
| Generalisability         | 21  | Discuss the generalisability (external validity) of the study results                                                                                                                                        | 13             |
| <b>Other information</b> |     |                                                                                                                                                                                                              |                |
| Funding                  | 22  | Give the source of funding and the role of the funders for the present study and, if applicable, for the original study on which the present article is based                                                | 14             |

\*Give information separately for cases and controls in case-control studies and, if applicable, for exposed and unexposed groups in cohort and cross-sectional studies.

**Note:** An Explanation and Elaboration article discusses each checklist item and gives methodological background and published examples of transparent reporting. The STROBE checklist is best used in conjunction with this article (freely available on the Web sites of PLoS Medicine at <http://www.plosmedicine.org/>, Annals of Internal Medicine at <http://www.annals.org/>, and Epidemiology at <http://www.epidem.com/>). Information on the STROBE Initiative is available at [www.strobe-statement.org](http://www.strobe-statement.org).

# BMJ Open

## Low Back Pain in the Bangladeshi Adult Population: A Cross-sectional National Survey

|                                 |                                                                                                                                                                                                                                                                                                                                                                                                                                                                                                                                                                                                                                  |
|---------------------------------|----------------------------------------------------------------------------------------------------------------------------------------------------------------------------------------------------------------------------------------------------------------------------------------------------------------------------------------------------------------------------------------------------------------------------------------------------------------------------------------------------------------------------------------------------------------------------------------------------------------------------------|
| Journal:                        | <i>BMJ Open</i>                                                                                                                                                                                                                                                                                                                                                                                                                                                                                                                                                                                                                  |
| Manuscript ID                   | bmjopen-2021-059192.R2                                                                                                                                                                                                                                                                                                                                                                                                                                                                                                                                                                                                           |
| Article Type:                   | Original research                                                                                                                                                                                                                                                                                                                                                                                                                                                                                                                                                                                                                |
| Date Submitted by the Author:   | 17-Aug-2022                                                                                                                                                                                                                                                                                                                                                                                                                                                                                                                                                                                                                      |
| Complete List of Authors:       | Momen Majumder, Muhammad Shoaib; Bangabandhu Sheikh Mujib Medical University, Rheumatology<br>Hakim, Ferdous; World Health Organization Bangladesh<br>Bandhan, Iftekhar ; Bangabandhu Sheikh Mujib Medical University, Rheumatology<br>Razzaque, Mohammad Abdur; Chittagong Medical College, Medicine<br>Zahid-Al-Quadir, Ahmad ; Sylhet MAG Osmani Medical College, Medicine<br>Ahmed, Shamim; Bangabandhu Sheikh Mujib Medical University<br>Choudhury, Minhaj; Bangabandhu Sheikh Mujib Medical University, Rheumatology<br>Haq, Syed; Bangabandhu Sheikh Mujib Medical University, Rheumatology<br>Zaman, MM; WHO Bangladesh |
| <b>Primary Subject Heading</b>: | Epidemiology                                                                                                                                                                                                                                                                                                                                                                                                                                                                                                                                                                                                                     |
| Secondary Subject Heading:      | Rheumatology                                                                                                                                                                                                                                                                                                                                                                                                                                                                                                                                                                                                                     |
| Keywords:                       | EPIDEMIOLOGY, RHEUMATOLOGY, PUBLIC HEALTH, PREVENTIVE MEDICINE                                                                                                                                                                                                                                                                                                                                                                                                                                                                                                                                                                   |
|                                 |                                                                                                                                                                                                                                                                                                                                                                                                                                                                                                                                                                                                                                  |

SCHOLARONE™  
Manuscripts



I, the Submitting Author has the right to grant and does grant on behalf of all authors of the Work (as defined in the below author licence), an exclusive licence and/or a non-exclusive licence for contributions from authors who are: i) UK Crown employees; ii) where BMJ has agreed a CC-BY licence shall apply, and/or iii) in accordance with the terms applicable for US Federal Government officers or employees acting as part of their official duties; on a worldwide, perpetual, irrevocable, royalty-free basis to BMJ Publishing Group Ltd ("BMJ") its licensees and where the relevant Journal is co-owned by BMJ to the co-owners of the Journal, to publish the Work in this journal and any other BMJ products and to exploit all rights, as set out in our [licence](#).

The Submitting Author accepts and understands that any supply made under these terms is made by BMJ to the Submitting Author unless you are acting as an employee on behalf of your employer or a postgraduate student of an affiliated institution which is paying any applicable article publishing charge ("APC") for Open Access articles. Where the Submitting Author wishes to make the Work available on an Open Access basis (and intends to pay the relevant APC), the terms of reuse of such Open Access shall be governed by a Creative Commons licence – details of these licences and which [Creative Commons](#) licence will apply to this Work are set out in our licence referred to above.

Other than as permitted in any relevant BMJ Author's Self Archiving Policies, I confirm this Work has not been accepted for publication elsewhere, is not being considered for publication elsewhere and does not duplicate material already published. I confirm all authors consent to publication of this Work and authorise the granting of this licence.

# 1 Low Back Pain in the Bangladeshi Adult Population: A Cross-sectional National Survey

## 2 3 *Short Running Head: Low Back Pain in Bangladesh*

4 **Authors:** Muhammad Shoaib Momen Majumder, Ferdous Hakim, Iftexhar Hussain Bandhan,  
5 Mohammad Abdur Razzaque, Ahmad Zahid-Al-Quadir, Shamim Ahmed, Minhaj Rahim  
6 Choudhury, Syed Atiqul Haq, Mohammad Mostafa Zaman

### 7 8 **Author names, highest academic degrees, appointments, Email and ORCID:**

9 Muhammad Shoaib Momen Majumder, FCPS (Medicine), MD (Rheumatology); Department of  
10 Rheumatology, Bangabandhu Sheikh Mujib Medical University (Ringgold ID 74464), Bangladesh,  
11 Email: momen.shoaib@gmail.com, ORCID ID: <https://orcid.org/0000-0002-7901-0847>;

12 Ferdous Hakim, MPH (Epidemiology), Research and Publication, World Health Organization  
13 Bangladesh (Ringgold ID 215134), Email: hakimf@who.int, ORCID: <https://orcid.org/0000-0003-2376-3978>;

14 Iftexhar Hussain Bandhan, MD (Rheumatology), Department of Rheumatology, Bangabandhu Sheikh  
15 Mujib Medical University (Ringgold ID 74464), Bangladesh, Email: ibandhan@gmail.com, ORCID  
16 ID: <https://orcid.org/0000-0002-3800-6155>;

17 Mohammad Abdur Razzaque, MD (Rheumatology), Register, Department of Medicine, Chittagong  
18 Medical College (Ringgold ID 467859), Bangladesh, Email: rhrazzaq@gmail.com, ORCID ID:  
19 <https://orcid.org/0000-0002-2395-542X>;

20 Ahmad Zahid-Al-Quadir, MD (Rheumatology), Department of Medicine, Sylhet MAG Osmani  
21 Medical College (Ringgold ID 469196), Email: drzahidssmc@gmail.com, <https://orcid.org/0000-0003-4178-6487>;

22 Shamim Ahmed, FCPS (Medicine), Associate Professor of Rheumatology, Bangabandhu Sheikh  
23 Mujib Medical University (Ringgold ID 74464), Dhaka, Bangladesh, Email:  
24 dr\_shamim\_ahmed@yahoo.com;

25 Minhaj Rahim Choudhury, MD, FCPS (Medicine) Professor of Rheumatology, Bangabandhu Sheikh  
26 Mujib Medical University (Ringgold ID 74464), Dhaka, Bangladesh, Email: drminhaj11@gmail.com,  
27 ORCID ID: <https://orcid.org/0000-0002-8695-5240>;

28 Syed Atiqul Haq, FCPS (Medicine), MD, FRCP, Professor of Rheumatology, Bangabandhu Sheikh  
29 Mujib Medical University (Ringgold ID 74464), Dhaka, Bangladesh, Email:  
30 haqsyedatiqul@gmail.com, ORCID ID: <https://orcid.org/0000-0003-4154-7283>

31 Mohammad Mostafa Zaman, PhD (Epidemiology), Advisor, Research and Publication, World Health  
32 Organization Bangladesh (Ringgold ID 215134), Email: zamanm@who.int, ORCID ID:  
33 <https://orcid.org/0000-0002-1736-1342>;

34 **Counts:** Number of words (abstract): 263, number of words (body): 3471, number of  
35 references: 61, number of tables: 04, number of figures: 02

36  
37  
38  
39  
40  
41  
42  
43  
44  
45  
46  
47  
48 **Name, address, email of the author responsible for correspondence:**

1  
2  
3  
4 49 Muhammad Shoaib Momen Majumder, FCPS (Medicine), MD (Rheumatology); Department of  
5 50 Rheumatology, Bangabandhu Sheikh Mujib Medical University (Ringgold ID 74464), Bangladesh,  
6 51 Email: momen.shoaib@gmail.com, ORCID ID: <https://orcid.org/0000-0002-7901-0847>  
7  
8  
9 52

## 10 53 **ABSTRACT**

### 11 54 **Objective:**

12 55 Low back pain (LBP) is a common musculoskeletal disorder. This study aims to determine  
13 56 the residence- and sex-specific prevalence and the factors associated with LBP in  
14 57 Bangladesh.  
15  
16  
17  
18  
19 58

### 20 59 **Methods:**

21 60 The study subjects (ages  $\geq 18$  years) were identified from 20 primary sampling units of the  
22 61 national census following a cross-sectional multi-stage stratified sampling design. We  
23 62 considered the mechanical type of LBP for this study. A Bangla version of the modified  
24 63 Community Oriented Program for Control of Rheumatic Disorders questionnaire was used. A  
25 64 team of trained field workers, rheumatology residents and rheumatologists collected the data.  
26 65 Analysis was done using weighted data.  
27  
28  
29  
30  
31  
32  
33  
34

### 35 67 **Results:**

36 68 Two thousand subjects were approached, but 1843 could be screened. Among them, 561 had  
37 69 musculoskeletal disorders, and 343 were diagnosed with LBP. The weighted prevalence of  
38 70 LBP was 18.5% (95% confidence interval, CI: 11.8–25.2) and age-standardized prevalence of  
39 71 LBP was 19.4% (95% confidence interval, CI: 14.0–24.8), which was higher in women  
40 72 (27.2%, 19.3–35.1) than men (14.0%, 8.7–19.3). The prevalence persistently increased from  
41 73 age group 18–34 years (10.5%, 5.7–15.4) to  $\geq 55$  years (27.8%, 16.1–39.5). People with no  
42 74 education had the highest prevalence (31.3%, 22.3–40.4). The prevalence did not differ  
43 75 between urban and rural residential locations. Four factors were significantly associated with  
44 76 LBP: age (adjusted odds ratio (2.4, 95% CI: 1.7–3.4), female sex (2.2, 1.5–3.3), absence of  
45 77 formal education (2.3, 1.6–3.3), and hypertension (1.7, 1.1–2.6).  
46  
47  
48  
49  
50  
51  
52  
53  
54  
55

### 56 79 **Conclusion:**

1  
2  
3  
4 80 LBP is a common problem in Bangladeshi adults. The factors identified are age, female sex,  
5  
6 81 no formal education, and hypertension. These should be addressed adequately to prevent and  
7  
8 82 treat LBP.  
9

10 83

11 84 **Keywords:** Low back pain, factors, Bangladesh, prevalence, cross-sectional survey  
12

13 85

### 14 86 **Strengths and Limitations**

15  
16 87 ▪ We report the weighted prevalence of low back pain by sociodemographic characteristics,  
17  
18 88 comorbidities, disability and work loss, and identified factors associated with back pain  
19  
20 89 patients, for the first time in Bangladesh.

21  
22 90 ▪ All the diagnoses were made by rheumatology residents and expert rheumatologists in the  
23  
24 91 field.

25  
26 92 ▪ Some diagnoses of evolving rheumatological conditions might lack validity because of  
27  
28 93 lack of quality laboratory facilities in the field.

29  
30 94 ▪ The sample size calculation is based on combined prevalence of musculoskeletal disorders  
31  
32 95 that warrant cautious interpretation of the results because of inadequate sample size,  
33  
34 96 especially when split into reporting domains.

35  
36 97 ▪ Recall period for determining work loss was 12 months which might induce bias.  
37  
38  
39  
40  
41  
42  
43  
44  
45  
46  
47  
48  
49  
50  
51  
52  
53  
54  
55  
56  
57  
58  
59  
60

## 99 INTRODUCTION

100 Low back pain (LBP) is one of the most frequent medical problems globally [1]. It is defined  
101 as pain, stiffness, or muscle tension localized below the costal margin and above the inferior  
102 gluteal folds [2]. Up to 84% of adults suffer from LBP at some point in life [3]. The  
103 prevalence of chronic LBP is about 23% [4]. Around 11–12% of the population become  
104 disabled due to LBP [1]. It causes substantial personal, social and financial burdens globally  
105 [1]. In the USA, LBP is the second most frequent cause for a physician consultation [5]. LBP  
106 is ranked globally as the topmost cause of disability as it affects mostly working-age people  
107 [6]. It accounted for 60.1 million disability-adjusted life-years in 2015 [7]. There was a  
108 significant increase of LBP by 54% since 1990, and the highest escalation took place in the  
109 low and middle-income countries (LMICs) [7]. Disability from LBP is a primary concern for  
110 the LMICs, specially in Bangladesh where manual labour–rickshaw pulling, day laborers,  
111 house maids, work exposure to lifting of heavy weight during their day-to-day activities etc.–  
112 is common [7]. The scope for job switching is restricted in resource constraint countries.

113  
114 LBP has multi-sectorial health outcomes like a lower quality of life, poorer self-reported  
115 health, depression and more workspace absenteeism [8]. As a result, LBP has become an  
116 important cause of sick leave and early retirement among the working population [9]. In the  
117 USA, approximately 149 million workdays are lost due to LBP, leading to an estimated loss  
118 of 100–200 billion US dollars per year [10]. Non-specific LBP is the commonest of all causes  
119 of LBP [4]. Non-specific LBP is defined as LBP not particularly attributable to specific  
120 aetiology like malignancy, infection, fracture, inflammatory condition, radiculopathy or  
121 cauda equina syndrome [4].

122  
123 Albeit high in most studies, there is a difference in LBP prevalence in various  
124 epidemiological studies. The estimated lifetime prevalence was 84.1% in a Canadian study  
125 [11], 70% in Denmark [12], 59% in the UK [13]. In Iran, the prevalence of LBP was 29.3%  
126 [14]. The estimated prevalence of LBP in India ranged between 42 and 83% [15, 16]. A  
127 recent cross-sectional, community-based, epidemiological study conducted in Northern India  
128 yielded an estimated lifetime prevalence of 47% in man 57% in women [17]. A Community  
129 Oriented Program for Control of Rheumatic Disorders (COPCORD) survey in Bangladesh  
130 published in 2005 showed 6.6%, 9.9%, and 9.2% prevalence of LBP in the rural, urban slum,



1  
2  
3  
4 131 and affluent urban areas, respectively [18]. A cross-sectional national study in Bangladesh in  
5 132 2015 showed LBP was the top-ranking musculoskeletal disorder (MSD) with a prevalence of  
6 133 18.6% [19]. We have further analyzed the data from the 2015 study and report the population  
7 134 weighted prevalence according to sociodemographic factors, comorbid conditions, disability  
8 135 and work loss due to LBP, and identify the factors associated with LBP.  
9  
10  
11  
12

13 136

14 137 **METHODS**

15 138 A detailed description of the methodology is beyond the scope of this article and is described  
16 139 elsewhere [19]. Adults aged 18 years or more comprised the study population through a  
17 140 household level multi-stage stratified cross-sectional survey. The sampling frame was based  
18 141 on the 2001 Bangladesh Census [20]. Based on a point prevalence of MSD and with a design  
19 142 effect of 1.5 and 85% response rate for four reporting domains (man-woman, urban-rural),  
20 143 the calculated sample size was 1,978, which was rounded to 2,000. It was stratified into seven  
21 144 divisions of rural (Mauza) and urban (Mahalla) areas. Twenty (8 urban and 12 rural) primary  
22 145 sampling units (PSUs) were selected. The first 100 households were consecutively included  
23 146 from each PSU, where even numbers were assigned as man and odd numbers as woman  
24 147 households. In each household, the single respondent was identified from a list of eligible  
25 148 household members with the help of a Kish table. Data was collected in November and  
26 149 December of 2015. (**Figure 1**)  
27  
28  
29  
30  
31  
32  
33  
34  
35  
36

37 150

38 151 A detailed manual was prepared before the training for this survey and was used by all field  
39 152 staff. All investigators and the WHO technical team coordinated and conducted the training.  
40 153 The modified COPCORD questionnaire was the survey tool [21]. The English version of the  
41 154 first part of the questionnaire was translated to Bangla, then adapted according to the  
42 155 guideline of Beaton et al [22], validated by Chassany's Method [23], and administered by the  
43 156 interviewers. Data were collected for six days from each PSU. There were two recall visits to  
44 157 ensure participation. The research physician interviewed the suspected respondents for  
45 158 MSDs. A subject was considered a positive respondent if he/she reported pain in muscles,  
46 159 bones, joints, or any part of the body (musculoskeletal system) during the preceding seven  
47 160 days. Subjects who were taking pain medications like non-steroidal anti-inflammatory drugs  
48 161 (NSAID) or steroids were considered as positive respondent even if they did not report pain  
49 162 on those seven days. All positive respondents were interviewed and examined by the research  
50  
51  
52  
53  
54  
55  
56  
57  
58  
59  
60

1  
2  
3  
4 163 physicians. Internationally accepted criteria were used for the diagnosis of the diseases. For  
5  
6 164 the conditions without any internationally accepted criteria, relevant investigations and  
7  
8 165 clinical judgment of the research physician was used. The final diagnoses were checked and  
9  
10 166 verified by a rheumatologist during their visit to respective PSUs.

11 167  
12  
13 168 LBP group of disorders were operationally defined as mechanical type back pain that  
14  
15 169 included non-specific LBP and lumbar spondylosis. Considering the limitation of  
16  
17 170 differentiating investigation in the field, we did not classify LBP beyond this. LBP duration  
18  
19 171 was classified into three groups: acute: up to 6 weeks, subacute: 6-12 weeks, and chronic that  
20  
21 172 persists beyond 12 weeks [24]. Respondents with pain in the muscles, bones, joints, or any  
22  
23 173 part of the body (musculoskeletal symptom) during the preceding seven days or on pain  
24  
25 174 medication with no pain were considered as positive respondents. The research physicians  
26  
27 175 interviewed and thoroughly examined all 'positive' respondents. Data on physical activity  
28  
29 176 were calculated into metabolic equivalent tasks (MET)-minutes per week using the  
30  
31 177 STEPwise Surveillance of noncommunicable disease risk factors (STEPS) protocol and  
32  
33 178 divided into quartiles [25]. The 4<sup>th</sup> quartile was labelled as strenuous physical activity.

34 179  
35 180 The study participants were divided into three subgroups as per age in years: 18-34, 35-54  
36  
37 181 and 55-99. We considered ownership of household asset items (electricity, television,  
38  
39 182 refrigerator, etc.) for constructing wealth index. In addition, the type of main material used  
40  
41 183 for the roof of the main house (cement, tin and katcha such as bamboo/thatched/straw/gunny  
42  
43 184 etc.) was also included in the model. A principal component analysis was used to create  
44  
45 185 standardized factor scores for each of the items. The total scores for the respondents were  
46  
47 186 calculated and categorized those into quartiles for description from one (lowest household  
48  
49 187 wealth) to four (highest household wealth) [19].

50 188  
51 189 A validated Bangla version of the Bangla Health Assessment Questionnaire - Disability Index  
52  
53 190 (HAQ-DI) was used for the disability score. For determining work loss, the recall period was  
54  
55 191 12 months [26]. Random capillary blood glucose was measured by using glucometer (Accu-  
56  
57 192 Check Germany). Using height (meters) and weight (kilograms) measurements, we calculated  
58  
59 193 BMI [weight (kg)/height (meter)<sup>2</sup>]. Waist circumference was measured by horizontally  
60  
194 placing a measuring tape above the iliac crest. Diabetes was defined as random blood glucose

1  
2  
3  
4 195  $\geq 11.1$  mmol/l or the use of anti-diabetic medications. Obesity was defined as a body mass  
5  
6 196 index of  $\geq 25$  kg/meter squared [27].  
7

8 197

9 198 **Statistical analysis:**

10  
11 199 The survey data were entered in and cleaned using Microsoft Excel. We have weighted [28]  
12  
13 200 the data to reflect population frame of Bangladesh for the year 2015. Base weight—for the  
14  
15 201 sampled population—was calculated using probability of selection of respondents among the  
16  
17 202 eligible number of members of household in a cluster defined by divisions (7), age groups (3)  
18  
19 203 and sexes (2). The base weight was adjusted with non-response weights separately for men  
20  
21 204 and women by three age groups. The final weight was generated after calibration to frame  
22  
23 205 population (2015) in domains by division, sex and age groups. Analysis was done using the  
24  
25 206 final weights.

26 207

27 208 Statistical analysis was done using Epi Info Version 7.1.5.2 and in SPSS Version 20.0.

28 209 Continuous variables were categorized before analysis as appropriate. We estimated the

29 210 prevalence of LBP with 95% confidence intervals. The prevalence was segregated by

30 211 residence (urban/ rural) and sex (man/ woman). Nonparametric test (Kruskal-Wallis H test)

31 212 was used to analyze data that were not normally distributed. Whenever we encountered an

32 213 unweighted respondent size of less than 25, the confidence intervals were suppressed. Age-

33 214 standardization of prevalence estimates was made for global comparison using the WHO

34 215 World Population 2000-2025 [29]. Factors were checked for association with LBP by

35 216 comparing LBP with no MSD through 2x2 tables. Univariate logistic regression analysis was

36 217 done to obtain unadjusted odds ratios. All statistically significant relationships ( $P < 0.05$ ) were

37 218 entered into a model for logistic regression analysis. The adjusted odds ratios and their 95%

38 219 confidence limits were calculated to identify the strength of association of LBP factors. A

39 220 detailed description of categorization and analysis of other variables was described elsewhere

40 221 [19].  
41

42 222

43 223 **Ethics Approval and Consent to Participate:**

44 224 Ethical guidelines, as outlined by the Declaration of Helsinki, were followed throughout the

45 225 study [30]. Ethical clearance was obtained from the Institutional Review Board of  
46  
47  
48  
49  
50  
51  
52  
53  
54  
55  
56  
57  
58  
59  
60

226 Bangabandhu Sheikh Mujib Medical University (ID 1100). Informed written consent was  
227 obtained from the respondents in Bangla as per Institutional Review Board's guidelines.

228

229 **Patient and Public Involvement:**

230 Patient or the public were not involved in the design, or conduct, or reporting, or  
231 dissemination plans of this study.

232

233 **RESULTS**

234 **Characteristics of respondents:**

235 In this nationally representative study, 2,000 adults 18 years or older were approached, and  
236 1,843 (92.2%) agreed to participate [19]. The mean age of the participants was 40.5 (standard  
237 deviation 14.7) years, and 51.6% were women. A total of 561 (30.4%) had some type of  
238 MSDs. LBP was the most common among MSDs (18.6%, unadjusted), followed by knee  
239 osteoarthritis (7.3%) and soft-tissue rheumatism (5.2%). Among the inflammatory rheumatic  
240 diseases, the common conditions were rheumatoid arthritis (1.6%) and spondyloarthritis  
241 (1.3%).

242

243 **Table 1** shows the changes brought in by the weighting procedure on the unweighted sample.

244 The weighted percentages are more in line with the projected Population Frame [20] from  
245 which the study sample was drawn.

246

247 **Characteristics of respondents with LBP:**

248 **Prevalence:**

249 We report here (**Table 2**) weighted prevalence of LBP was 18.5% (95% CI: 11.8–25.2).  
250 However, the age-standardized prevalence of LBP to be 19.4% (95% CI: 14.0–24.8), which is  
251 significantly higher in women (27.2%, 19.3–35.1) than men (14.0%, 8.7–19.3). There has  
252 been a persistent increase in prevalence from 10.5% (95% CI 5.7–15.4) in 18–34 years age  
253 group to 27.8% (95% CI 16.1–39.5) in 55–99 years age group. This trend was more  
254 prominent in women. The prevalence did not vary significantly among occupational groups.  
255 People with no formal education had significantly highest prevalence of LBP (31.3%, 22.3–  
256 40.4) compared to other educational groups. Although the highest prevalence (23.5% (13.9–  
257 33.0)) was observed in the 1st quartile of the wealth index, it did not vary significantly. LBP

1  
2  
3  
4 258 was not significantly associated with strenuous physical activity in our sample. We checked  
5  
6 259 LBP prevalence by urban (14.6%, 9.9–19.2) and rural (20.2%, 11.0.6–29.3) categories, but it  
7  
8 260 did not differ significantly. Among the co-morbidities, the prevalence of LBP was higher  
9  
10 261 among patients of hypertension (26.7%, 15.0–38.4) and obesity (20.6%, 13.0–28.3). The  
11  
12 262 highest prevalence of LBP (87.3%, 80.2–94.4) was seen in respondents who had multiple  
13  
14 263 (two or more) MSDs such as LBP, knee osteoarthritis, soft tissue rheumatism, non-  
15  
16 264 inflammatory MSDs, cervical spondylosis etc. **(Figure 2)**

16 265

### 17 266 ***Background characteristics:***

18  
19 267 Among the LBP respondents (n=343), 63.3% were women, and 65.3% were from rural areas.  
20  
21 268 Mean age in years (95% confidence interval) was 45.3 (43.0–47.7) overall, and 48.3 (45.8–  
22  
23 269 50.9) in men and 44.0 (41.0–47.0) in women. The study participants were divided into three  
24  
25 270 subgroups as per age, and the highest number of LBP was observed in the 35–54 age group.  
26  
27 271 More than half (%), 95% confidence interval: 57.4%, 48.2–66.6) were homemakers (all  
28  
29 272 women), while the rest constituted other occupations like laborer, business professional,  
30  
31 273 service holder and others. Almost half of the participants with LBP had no formal education  
32  
33 274 (53.2%, 41.6–64.9). Overall, according to the wealth index, 33.2% (22.6–43.9) of  
34  
35 275 respondents belonged to the 1<sup>st</sup> quartile (lowest socioeconomic status). About three-fourth of  
36  
37 276 the respondents (77%, 55.9–98.0) had rural residence. **(Table 3)**

37 277

### 38 278 ***Disability and work loss:***

39  
40 279 The distribution of Bengali HAQ-DI scores was not normally distributed among the LBP  
41  
42 280 patients. The scores ranged from 0–2.6. The LBP group's median (interquartile range) was  
43  
44 281 0.6 (0.3–0.9). The difference of Bangla HAQ-DI score between LBP (n=343) and no MSD  
45  
46 282 (n=60) is statistically significant (P<0.0001) by the Kruskal-Wallis H test, indicating that  
47  
48 283 LBP is associated with a higher disability. The distribution of days lost from work for LBP  
49  
50 284 group had a highly skewed distribution and ranged from 0–365 days. However, the difference  
51  
52 285 of days lost from work (n=1,625) between LBP (n=343) and no MSD (n=1,282) is  
53  
54 286 statistically significant (P<0.0001) by the Kruskal-Wallis H test, indicating that LBP is  
55  
56 287 associated with more days lost.

56 288

### 57 289 ***Factors associated:***

1  
2  
3  
4 290 Univariate logistic regression analysis did not show any significant association of LBP with  
5  
6 291 occupation, strenuous physical activity, wealth indices, tobacco use, obesity, and diabetes  
7  
8 292 (Table 4). A significant association was observed for age group 35–99 years, female sex,  
9  
10 293 lack of education, history of physical trauma, and hypertension according to the unadjusted  
11  
12 294 odds ratio and their 95% confidence intervals ( $P<0.05$ ). These significant associations  
13  
14 295 ( $P<0.01$ ) persisted in the multiple logistic regression analysis having age sex, education and  
15  
16 296 hypertension. into the model simultaneously.

17 297

18 298 **DISCUSSION**

19  
20 299 LBP is a common medical problem with very high personal and societal impact, leading to  
21  
22 300 poor quality of life and workability [31]. In this survey we report that one in five adults in  
23  
24 301 Bangladesh suffers from LBP. The prevalence in Bangladesh is similar to Kuwait (22.7%)  
25  
26 302 [32] and Qatar (23.3%) [33] but lower than northern India (32%) [34] and Iran (29.3%) [14].  
27  
28 303 Malaysia (11.6%) [35] has a lower prevalence of LBP than we report here. In some previous  
29  
30 304 studies in Bangladesh the prevalence was found 25.6% among medical students [36], 36.6%  
31  
32 305 in bank employees [37], 60.8% among physiotherapists [38]. Lack of maintenance of correct  
33  
34 306 posture during sitting and scarcity of knowledge, understanding, or application of ergonomics  
35  
36 307 are responsible for high prevalence rate among these groups [36, 38].

37 308

38  
39 309 A systematic review of 165 studies from 54 countries revealed the global prevalence of LBP  
40  
41 310 of 12–33% [1]. According to the systematic analysis of the Global Burden of Disease Study  
42  
43 311 2017, LBP was the leading cause of YLDs (years lived with disability) [39]. In our study, the  
44  
45 312 rural people had a higher prevalence of LBP than the urban people. This difference—though  
46  
47 313 not statistically significant—was probably due to lower doctor concentration in the rural areas,  
48  
49 314 financial limitations, and less education status. However, regional variation was observed in  
50  
51 315 other studies [14].

52 316

53  
54 317 Age was a factor associated with LBP in this study. The prevalence of LBP persistently  
55  
56 318 increased with age but this was not statistically significant. However, an analysis reported  
57  
58 319 that the risk and prevalence of low back pain increased with age [5]. A systematic review of  
59  
60 320 the global prevalence of LBP revealed the association of age was highest in the 40–49 age  
321  
322 group [1, 40]. The overall prevalence rises with age 65, which gradually reduces thereafter

1  
2  
3  
4 322 [41]. Some possible explanations are LBP characteristics in older adults that differ from the  
5  
6 323 middle-aged population (less intense back pain, more leg pain, and more depression) [42].  
7  
8 324 Our study showed a higher prevalence of LBP among women than men, consistent with some  
9  
10 325 other analyses [1, 41]. This could be due to more household or domestic activities among  
11  
12 326 women compared to men. This finding agrees with the results from the national health survey  
13  
14 327 on the Iranian population [14]. Another Indian study found no significant difference in age  
15  
16 328 and sex scores in their study [43]. Higher women prevalence can be partially explained that  
17  
18 329 they have a lower pain threshold than men [44]. The sex differences may be implied with  
19  
20 330 gonadal steroid hormones like estradiol and testosterone that modulate sensitivity to pain and  
21  
22 331 analgesia [45]. Women always experienced a higher frequency of visceral pain (e.g., during  
23  
24 332 menstruation, pregnancy) than men [46]. It seems that in painful conditions, women exhibit a  
25  
26 333 greater prevalence than men as women report more pain [47].  
27  
28 334

29  
30 335 Leboeuf-Yde considered body weight as a possible weak indicator for LBP in his systematic  
31  
32 336 literature review due to lack of evidence [48]. The results obtained in our study did not  
33  
34 337 demonstrate a statistically significant association between LBP and higher BMI. Some other  
35  
36 338 studies found obesity or high BMI associated with increased risk LBP development and  
37  
38 339 severity [14, 49]. However, a cross-sectional study including nine countries found BMI  
39  
40 340  $\geq 25\text{kg/m}^2$  as a risk factor for LBP in five countries (Finland, Poland, Russia, South Africa  
41  
42 341 and Spain), whereas it was not associated with LBP in the remaining four countries (China,  
43  
44 342 Ghana, India and Mexico) [50].  
45  
46 343

47  
48 344 In our research, we found that the absence of formal education is significantly associated with  
49  
50 345 LBP. A cross-sectional study in the United States found that LBP is more common in people  
51  
52 346 who have had less than high school education [51]. Other studies in the USA, UK, and Iran  
53  
54 347 found lower educational status had an increased association with LBP and found higher  
55  
56 348 education inversely associated with LBP [14, 52]. Several proposed mechanisms may  
57  
58 349 account for the relationship between low academic status and back pain. The amount of  
59  
60 350 formal education contributes to the types of jobs that an individual may involve in, and  
351 subsequently, the types of jobs influence LBP [53]. Moreover, health education regarding  
352 posture management, lifestyle changes, physical exercises, stress management poorly reached  
353 among people with an absence of formal education. We didn't find any significant association

1  
2  
3  
4 354 of LBP with occupation. However, in our opinion, the larger number of homemakers affected  
5  
6 355 with LBP might be linked with their nature of heavy work such as squatting, bending lifting  
7  
8 356 heavy objects, prolonged standing etc. in the household. In a US-based study, LBP was  
9  
10 357 significantly related to occupational factors such as truck driving, lifting, carrying, pulling,  
11  
12 358 pushing, twisting, and non-driving vibrational exposure [54]. In some European countries,  
13  
14 359 workers involved in heavy weightlifting ( $\geq 25$  kg) suffered more from LBP [55].

15 360

16 361 Studies reported associations between LBP and lower social class [14, 51] but we did not find  
17  
18 362 any significant association of LBP with economic status. This finding is coherent with a  
19  
20 363 Danish study where they did not find any possible relationship between socioeconomic status  
21  
22 364 and LBP [56]. In our analysis, trauma tended to be associated (unadjusted OR) with overall  
23  
24 365 LBP, but the association was lost after adjustment. Trauma is not supposed to lead to chronic  
25  
26 366 LBP and the persistence of back pain was more associated with psychological factors like  
27  
28 367 stress, low education status, etc., than trauma itself [57]. We found a positive relationship  
29  
30 368 between hypertension and LBP. LBP may cause inactivity and lack of exercise resulting  
31  
32 369 in weight gain, subsequently creating or exaggerating co-morbid conditions like hypertension  
33  
34 370 and diabetes mellitus. The Hong Kong Disc Degeneration-Cardiovascular Cohort showed  
35  
36 371 that HTN increases the possibility of moderate or severe disc degeneration which is highly  
37  
38 372 associated with LBP [58]. Another long-term Finish study revealed that both SBP and DBP  
39  
40 373 were positively associated with LBP suggesting atherosclerosis of lumbar vessels a possible  
41  
42 374 mechanism of development of LBP [59]. In a Korean survey, the lifetime prevalence of LBP  
43  
44 375 was 34.4% among the hypertensive respondents, but the adjusted OR of LBP prevalence was  
45  
46 376 significantly lower than the normotensive subjects (fully adjusted 0.79, 95% CI 0.70-0.90)  
47  
48 377 [60]. A Bangladeshi study conducted among the doctors working in a tertiary care hospital  
49  
50 378 found that HTN was the most common comorbid condition among the LBP sufferers [61].  
51  
52 379 There was no association between diabetes and LBP in this study.

53 380

### 54 381 ***Strengths and Limitations***

55 382 This is the first nationally representative survey report on LBP in Bangladesh, and probably,  
56  
57 383 among all south Asian nations. Although we have weighted the data for national  
58  
59 384 representation, the sample size calculation for the original study was based on point  
60  
385 prevalence of MSD [19]. We now know that the prevalence of LBP was 19.4% and



1  
2  
3  
4 386 prevalence of MSD was 30.4%. A larger sample size maintaining adequate power was  
5  
6 387 needed for generalizability of the study results. Therefore, a cautious interpretation is  
7  
8 388 necessary because of inadequate sample size, especially when split into reporting domains.  
9  
10 389 We have operationally defined the recall period for reporting work loss days as 12 months  
11  
12 390 which might induce bias. Trained rheumatology residents diagnosed the patients which was  
13  
14 391 verified by experienced rheumatologists in the field. Some diagnoses of evolving  
15  
16 392 rheumatological conditions might lack sufficient validity because of a lack of  
17  
18 393 adequate laboratory facilities in the field.  
19

## 20 395 **CONCLUSION**

21 396 This nationally representative study reports the population weighted prevalence of LBP by  
22  
23 397 sociodemographic background, comorbidities and associated factors in Bangladesh. One in  
24  
25 398 five adults suffer from LBP. Education and hypertension are modifiable factors that warrant  
26  
27 399 intervention. Increase in level of education, care to middle and older population, and good  
28  
29 400 control of hypertension may reduce LBP burden. A special attention is needed to prevent  
30  
31 401 LBP in women. Further study with a larger sample size addressing these neglected issues  
32  
33 402 may have more clarifications to decrease the burden of LBP.  
34  
35  
36  
37  
38  
39  
40  
41  
42  
43  
44  
45  
46  
47  
48  
49  
50  
51  
52  
53  
54  
55  
56  
57  
58  
59  
60

1  
2  
3  
4 **403 Abbreviations and acronyms:**  
5

---

|    |         |                                                               |
|----|---------|---------------------------------------------------------------|
| 6  | BMI     | Body mass index                                               |
| 7  |         |                                                               |
| 8  | BSMMU   | Bangabandhu Sheikh Mujib Medical University                   |
| 9  |         |                                                               |
| 10 | CI      | Confidence interval                                           |
| 11 |         |                                                               |
| 12 | COPCORD | Community oriented program from control of rheumatic diseases |
| 13 |         |                                                               |
| 14 | HAQ-DI  | Health Assessment Questionnaire - Disability Index            |
| 15 |         |                                                               |
| 16 | LBP     | Low back pain                                                 |
| 17 |         |                                                               |
| 18 | MSK     | Musculoskeletal                                               |
| 19 |         |                                                               |
| 20 | MSD     | Musculoskeletal disorder                                      |
| 21 |         |                                                               |
| 22 | OR      | Odds ratio                                                    |
| 23 |         |                                                               |
| 24 | PPS     | Population proportion to size                                 |
| 25 |         |                                                               |
| 26 | PSU     | Primary sampling unit                                         |
| 27 |         |                                                               |
| 28 | WHO     | World health organization                                     |

---

29 **404**

30 **405 Acknowledgement:** We gratefully acknowledge the field team, divisional coordinators, civil  
31  
32 surgeons, upazila health and family planning officers and health assistants for their support.  
33

34 **407**

35  
36 **408 Author contribution:**

37 **409** Muhammad Shoaib Momen Majumder (MSMM): Conceptualized the area of work, and  
38 prepared the first draft of the manuscript and revised the subsequent drafts.  
39

40 **411** Ferdous Hakim (FH): analyzed the data, guided preparation of graphs and tables, interpreted  
41 the results, revised the draft manuscript, and coordinated the writing exercise.  
42

43 **412** Iftexhar Hussain Bandhan (IHB): prepared graphs and tables, revised the draft manuscript.  
44

45 **413** Mohammad Abdur Razzaque (MAR): reviewed the manuscript and with special reference to  
46 the literature review.  
47

48 **414** Ahmed Zahid-Al-Quadir and Shamim Ahmed: Prepared the training manual, trained the field  
49 team, executed the field operation in coordination with the divisional investigators;  
50

51 **417** Minhaj R Choudhury, Syed Atiqul Haq and Mohammad Mostafa Zaman: Designed the study,  
52 guided the analysis and manuscript writing, critically reviewed the results and manuscript  
53

54 **418** drafts, ensured integrity of data.  
55

56 **420** All authors: Approved publication.  
57  
58  
59  
60

1  
2  
3  
4 422 **Funding:** Preparing this manuscript did not require any funding. However, the base study  
5 423 was supported by the World Health Organization, Bangladesh (Agreement Reference:  
6 424 SEBAN140895) back in 2015. As a part of its mandate to strengthen national research  
7 425 capacity, WHO provided technical guidance in designing, implementing, analysing data, and  
8 426 writing the report. However, it does not have any influence on the results.  
9  
10  
11  
12

13 427

14 428 **Consent to publish:** All authors contributed to the manuscript and provided consent to  
15 429 publish.  
16  
17

18 430

19 431 **Availability of data and materials:** The dataset used for this manuscript is available with  
20 432 the corresponding author upon reasonable request.  
21  
22

23 433

24 434 **Disclosure of Conflicts of Interest:** None of the authors has any conflict of interest to  
25 435 disclose. The authors alone are responsible for their views expressed in this article, which do  
26 436 not necessarily represent the institutions' views, decisions, or policies with which they are  
27 437 affiliated.  
28  
29

30 438

31 439 **Ethical Publication Statement:** We confirm that we have read the Journal's position on  
32 440 issues involved in ethical publication and affirm that this report is consistent with those  
33 441 guidelines.  
34  
35  
36  
37  
38

39 442  
40  
41  
42  
43  
44  
45  
46  
47  
48  
49  
50  
51  
52  
53  
54  
55  
56  
57  
58  
59  
60

## 443 Tables

444  
445**Table 1. Characteristics of the respondents with LBP by unweighted and weighted numbers, Musculoskeletal Disease Survey 2015**

| Sociodemographic characteristics | Unweighted sample (n=1,843) | Weighted* sample (N=94,794,164) |
|----------------------------------|-----------------------------|---------------------------------|
|                                  | number (percent)            | number (percent)                |
| Total                            | 1843 (100.0)                | 94,794,164 (100.0)              |
| Sex                              |                             |                                 |
| Men                              | 892 (48.4)                  | 41,553,976 (43.8)               |
| Women                            | 951 (51.6)                  | 53,240,188 (56.2)               |
| Residence                        |                             |                                 |
| Urban                            | 716 (38.9)                  | 27,772,657 (29.3)               |
| Rural                            | 1127 (61.2)                 | 67,021,507 (70.7)               |
| Age, years                       |                             |                                 |
| 18-34                            | 711 (38.6)                  | 41,343,470 (43.6)               |
| 35-54                            | 774 (42.0)                  | 35,278,850 (37.2)               |
| 55-99                            | 358 (19.4)                  | 18,171,844 (19.2)               |

\* Weighted to projected population of Bangladesh from 2001 Population Census Frame of Bangladesh Bureau of Statistics.

446

447

448

**Table 2. Weighted prevalence of low back pain by sociodemographic characteristics in Bangladesh, Musculoskeletal Disease Survey 2015**

| Sociodemographic characteristics         | Total            | Men              | Women            |
|------------------------------------------|------------------|------------------|------------------|
|                                          | Percent (95% CI) | Percent (95% CI) |                  |
| Overall                                  | 18.5 (11.8–25.2) | 13.1 (6.4–19.9)  | 22.7 (15.3–30.2) |
| Overall (age-standardized)*              | 19.4 (14.0–24.8) | 14.0 (8.7–19.3)  | 27.2 (19.3–35.1) |
| Age in years                             |                  |                  |                  |
| 18-34                                    | 10.5 (5.7–15.4)  | 5.2 (1.3–9.0)    | 13.5 (7.2–19.9)  |
| 35-54                                    | 23.1 (15.3–30.9) | 18.8 (8.7–28.8)  | 26.7 (18.3–35.1) |
| 55-99                                    | 27.8 (16.1–39.5) | 15.7 (6.7–24.7)  | 44.5 (23.9–65.1) |
| Occupation                               |                  |                  |                  |
| Homemaker                                | 23.6 (15.9–31.2) | –                | 23.6 (15.9–31.2) |
| Laborer†                                 | 18.2 (9.4–27.0)  | 17.9 (8.6–27.3)  | 21.2 (6.2–36.3)  |
| Business professional                    | 9.6 (1.9–17.2)   | 9.8 (1.9–17.6)   | –                |
| Service holder                           | 10.7 (1.2–20.1)  | 10.3 (0.4–20.2)  | –                |
| Others‡                                  | 13.9 (4.1–23.6)  | 8.6 (1.7–15.5)   | 20.3 (6.0–34.6)  |
| Education                                |                  |                  |                  |
| No formal education (0)                  | 31.3 (22.3–40.4) | 20.3 (13.4–27.2) | 37.4 (24.3–50.5) |
| Any primary education (1-5)              | 13.3 (6.7–19.9)  | 12.1 (3.9–20.3)  | 14.4 (7.8–21.0)  |
| Any secondary education (6-10)           | 14.9 (7.4–22.3)  | 12.0 (2.4–21.6)  | 17.5 (9.9–25.0)  |
| Above secondary (≥11 years)              | 6.9 (3.8–10.1)   | –                | 8.0 (3.7–12.3)   |
| Married‡                                 | 19.6 (12.4–26.7) | 14.1 (6.7–21.4)  | 23.7 (15.7–31.7) |
| Wealth index quartile§                   |                  |                  |                  |
| 1st                                      | 23.5 (13.9–33.0) | 19.5 (11.2–27.8) | 25.5 (12.9–38.2) |
| 2nd                                      | 19.8 (8.4–31.2)  | 17.3 (3.7–30.9)  | 21.6 (10.3–32.9) |
| 3rd                                      | 14.1 (7.6–20.5)  | 8.3 (2.3–14.2)   | 19.8 (11.7–28.0) |
| 4th                                      | 16.6 (9.3–23.8)  | 10.3 (3.2–17.4)  | 23.1 (11.5–34.7) |
| Residence                                |                  |                  |                  |
| Urban                                    | 14.6 (9.1–20.0)  | 9.8 (3.9–15.6)   | 17.7 (8.5–26.8)  |
| Rural                                    | 20.2 (10.5–29.8) | 14.3 (4.8–23.9)  | 25.1 (14.7–35.4) |
| Strenuous physical activity <sup>l</sup> | 17.1 (4.3–29.8)  | 17.2 (4.0–30.4)  | –                |
| History of physical trauma               | 24.5 (14.2–34.7) | 24.6 (13.0–36.2) | 24.4 (7.9–40.9)  |

All values are percent (95% confidence interval). Weighted percentages shown are calculated from Census 2001 Population Frame by Bangladesh Bureau of Statistics to reflect projected population of Bangladesh (N=94,794,164).

Bold face values denote statistically significant higher prevalence in women compared to men.

\* Standardized for WHO World Population 2000-2020.

† Labourer includes: farmer, daily worker, rickshaw puller, garments worker, field worker and others.

Other occupations: retired, weaver and housekeeper

‡ Includes currently married, divorced, separated and widowed.

§ The wealth index was constructed using principal component analysis out of a list of 20 household assets (see Methods section for details);

<sup>l</sup> Fourth quartile of the MET-minutes distribution of work-related physical activity. Commutation and leisure time physical activities were not considered because these were negligible contributors.

– 95% confidence interval not reported as number of respondents are <25.

449

450

451

**Table 3. Socioeconomic characteristics of patients of low back pain in Bangladesh, Musculoskeletal Disease Survey 2015**

| Sociodemographic characteristics | Total                                         | Men               | Women             |
|----------------------------------|-----------------------------------------------|-------------------|-------------------|
|                                  | Weighted percentage (95% confidence interval) |                   |                   |
| Age in years                     |                                               |                   |                   |
| Mean (95% confidence interval)   | 45.3 (43.0–47.7)                              | 48.3 (45.8–50.9)  | 44.0 (41.0–47.0)  |
| 18–34                            | 24.8 (18.8–30.7)                              | 14.1 (6.9–21.3)   | 29.6 (21.3–37.9)  |
| 35–54                            | 46.4 (40.6–52.2)                              | 55.6 (40.3–70.9)  | 42.3 (34.4–50.2)  |
| 55–99                            | 28.8 (22.5–35.1)                              | 30.3 (17.0–43.7)  | 28.1 (22.2–34.0)  |
| Occupation                       |                                               |                   |                   |
| Homemaker                        | 57.4 (48.2–66.6)                              | –                 | 83.2 (72.0–94.5)  |
| Laborer†                         | 20.4 (13.6–27.2)                              | 59.7 (38.8–80.5)  | 2.7 (0.1–5.4)     |
| Business professional            | 5.2 (1.2–9.1)                                 | 16.6 (5.0–28.2)   | –                 |
| Service holder                   | –                                             | –                 | –                 |
| Others‡                          | 13.5 (2.7–24.3)                               | 14.8 (2.8–26.8)   | 13.0 (1.5–24.4)   |
| Education                        |                                               |                   |                   |
| No formal education (0)          | 53.2 (41.6–64.9)                              | 39.1 (24.3–54.0)  | 59.6 (46.9–72.3)  |
| Any primary education (1-5)      | 17.2 (13.8–20.5)                              | 23.9 (17.1–42.6)  | 14.1 (10.1–18.1)  |
| Any secondary education (6-10)   | 24.1 (15.9–32.4)                              | 29.9 (17.1–42.6)  | 21.6 (13.1–30.1)  |
| Above secondary (≥11 years)      | 5.5 (1.0–9.9)                                 | –                 | –                 |
| Married‡                         | 97.8 (94.8–100.8)                             | 96.8 (92.2–101.3) | 98.3 (95.5–101.1) |
| Wealth index quartile§           |                                               |                   |                   |
| 1st                              | 33.2 (22.6–43.9)                              | 30.1 (18.8–41.4)  | 34.7 (21.7–47.7)  |
| 2nd                              | 25.5 (14.8–36.2)                              | 29.5 (11.5–47.5)  | 23.7 (14.6–32.7)  |
| 3rd                              | 19.7 (11.0–28.4)                              | 18.5 (6.7–30.3)   | 20.3 (10.5–30.1)  |
| 4th                              | 21.6 (9.2–33.9)                               | 21.9 (9.4–34.5)   | 21.4 (7.1–35.7)   |
| Rural residence                  | 77.0 (55.9–98.0)                              | 80.3 (60.2–100.4) | 75.5 (52.8–98.1)  |

\* All values are percent (95% confidence interval) unless stated otherwise. Weighted percentages shown are calculated from Census 2001 Population Frame by Bangladesh Bureau of Statistics to reflect projected population of Bangladesh (N=94,794,164).

† Labourer include: farmer, daily worker, rickshaw puller, garments worker, field worker and others. Other occupations: retired, weaver and housekeeper etc.

‡ Includes currently married, divorced, separated and widowed.

§ The wealth index was constructed using principal component analysis out of a list of 20 household assets (see Methods section for details);

- numbers are low

452

453

**Table 4: Odds ratios of factors associated with low back pain compared with no musculoskeletal disorders in Bangladeshi adults, Musculoskeletal Disease Survey 2015**

| Factors                                                                 | Odds ratio (95% confidence interval) |                        |
|-------------------------------------------------------------------------|--------------------------------------|------------------------|
|                                                                         | Unadjusted                           | Adjusted               |
| Age group, years<br>(35–99=1, 18–34=0)                                  | 3.2 (2.5–4.2)**<br>1.0               | 2.4 (1.7–3.4)**<br>1.0 |
| Sex<br>(woman=1, man=0)                                                 | 2.1 (1.3–3.3)**<br>1.0               | 2.2 (1.5–3.3)**<br>1.0 |
| Labourer†<br>(yes=1, no=0)                                              | 0.9 (0.7–1.3)<br>1.0                 | -<br>-                 |
| No formal education<br>(yes=1, no=0)                                    | 3.5 (2.5–5.0)**<br>1.0               | 2.3 (1.6–3.3)**<br>1.0 |
| Low wealth index<br>(yes=1, no=0)                                       | 1.6 (1.1–2.3)**<br>1.0               | 1.0 (0.6–1.5)<br>1.0   |
| Strenuous physical activity‡<br>(yes=1, no=0)                           | 0.8 (0.4–1.6)<br>1.0                 | -<br>-                 |
| Obesity (body mass index $\geq 25$ Kg/m <sup>2</sup> )<br>(yes=1, no=0) | 1.3 (0.8–2.1)<br>1.0                 | -<br>-                 |
| History of physical trauma<br>(yes=1, no=0)                             | 1.8 (1.1–3.2)*<br>1.0                | 1.6 (0.9–2.8)<br>1.0   |
| Current tobacco user<br>(yes=1, no=0)                                   | 1.1 (0.8–1.6)<br>1.0                 | -<br>-                 |
| Hypertension<br>(yes=1, no=0)                                           | 2.3 (1.3–4.0)**<br>1.0               | 1.7 (1.1–2.6)*<br>1.0  |
| Diabetes mellitus<br>(yes=1, no=0)                                      | 1.0 (0.5–1.7)<br>1.0                 | -<br>-                 |

LBP: low back pain; MSD: musculoskeletal disorder

\*  $P < 0.05$ , \*\*  $P < 0.01$

† Labourer includes: farmer, daily worker, rickshaw puller, garments worker, field worker and others.

‡ Fourth quartile of the MET-minutes distribution of work-related physical activity. Commutation and leisure time physical activities were not considered because these were negligible contributors.

454

1  
2  
3  
4 **455 Figures**  
5

6 **456 Fig. 1 Flow chart on the selection of low back pain patients from the national survey on**  
7 **457 musculoskeletal conditions in Bangladesh (2015) adapted from Ahmad Zahid-Al-**  
8 **458 Quadir *et al* [21]**  
9

10 **459**  
11 **460** \* Eight divisions from Sept 2015. Randomly 15 districts were selected out of 64.

12 **461** \*\* PPS indicates population proportion to size.

13 **462** \*\*\* Out-migration, broken house, locked house, no tenant, out of home, refusal. Two recall visits were done if  
14 **463** the selected house was locked and the person chosen was not available at home at the time of the interviewer's  
15 **464** visit. In case of non-participation after the second recall visit, the targeted household/individual was declared  
16 **465** non-respondents.

17 **466**

18 **467**

19 **468**

20 **469**

21 **470**  
22  
23  
24  
25  
26  
27  
28  
29  
30  
31  
32  
33  
34  
35  
36  
37  
38  
39  
40  
41  
42  
43  
44  
45  
46  
47  
48  
49  
50  
51  
52  
53  
54  
55  
56  
57  
58  
59  
60

For peer review only



1  
2  
3  
4 **471 Fig. 2 Weighted prevalences (percent) of low back pain in co-morbid conditions (error**  
5 **472 bars indicate 95% confidence intervals)**

7 \*Diabetes was defined as random capillary glucose level  $\geq 11.1$  or on medication for diabetes

8 †Obesity is defined as, body mass index  $\geq 25$  kg/m<sup>2</sup>;

9 ‡Hypertension was defined as systolic blood pressure  $\geq 140$  or diastolic blood pressure  $\geq 90$  or medication for  
10 hypertension;

11 473  
12 474  
13 475  
14 476  
15 477  
16 478  
17 479  
18 480  
19 481  
20 482  
21 483  
22 484  
23 485  
24 486  
25 487  
26 488  
27 489  
28 490  
29 491  
30 492  
31 493  
32 494  
33 495  
34 496  
35 497  
36 498  
37 499  
38 500  
39 501  
40 502  
41 503  
42 504  
43 505  
44 506  
45 507  
46 508  
47 509  
48 510  
49 511  
50 512  
51 513  
52 514  
53 515  
54 516  
55 517  
56 518  
57 519  
58 520  
59 521  
60 522  
523

For peer review only

524 **References**

- 525  
526 1. Hoy D, Bain C, Williams G, et al. A systematic review of the global prevalence of  
527 low back pain. *Arthritis Rheum.* 2012 Jun;64(6):2028-37. doi: 10.1002/art.34347.  
528  
529 2. Dionne CE, Dunn KM, Croft PR, et al. A consensus approach toward the  
530 standardization of back pain definitions for use in prevalence studies. *Spine (Phila Pa*  
531 *1976).* 2008 Jan 1;33(1):95-103. doi: 10.1097/BRS.0b013e31815e7f94.  
532  
533 3. Deyo RA, Tsui-Wu YJ. Descriptive epidemiology of low-back pain and its related  
534 medical care in the United States. *Spine (Phila Pa 1976).* 1987 Apr;12(3):264-8. doi:  
535 10.1097/00007632-198704000-00013.  
536  
537 4. Balagué F, Mannion AF, Pellisé F, et al. Non-specific low back pain. *Lancet.* 2012  
538 Feb 4;379(9814):482-91. doi: 10.1016/S0140-6736(11)60610-7.  
539  
540 5. Andersson GB. Epidemiological features of chronic low-back pain. *Lancet.* 1999 Aug  
541 14;354(9178):581-5. doi: 10.1016/S0140-6736(99)01312-4.  
542  
543 6. Fatoye F, Gebrye T, Odeyemi I. Real-world incidence and prevalence of low back  
544 pain using routinely collected data. *Rheumatol Int.* 2019 Apr;39(4):619-626. doi:  
545 10.1007/s00296-019-04273-0.  
546  
547 7. Hartvigsen J, Hancock MJ, Kongsted A, et al. Lancet Low Back Pain Series Working  
548 Group. What low back pain is and why we need to pay attention. *Lancet.* 2018 Jun  
549 9;391(10137):2356-2367. doi: 10.1016/S0140-6736(18)30480-X.  
550  
551 8. Parreira P, Maher CG, Steffens D, et al. Risk factors for low back pain and sciatica:  
552 an umbrella review. *Spine J.* 2018 Sep;18(9):1715-1721. doi:  
553 10.1016/j.spinee.2018.05.018.  
554  
555  
556  
557  
558  
559  
560

- 1  
2  
3  
4 547 9. Lötters F, Burdorf A. Prognostic factors for duration of sickness absence due to  
5  
6 548 musculoskeletal disorders. *The Clinical Journal of Pain*. 2006 Feb;22(2):212-221.  
7  
8  
9 549 DOI: 10.1097/01.ajp.0000154047.30155.72.  
10  
11 550 10. Guo HR, Tanaka S, Halperin WE, et al. Back pain prevalence in US industry and  
12  
13 551 estimates of lost workdays. *Am J Public Health*. 1999 Jul;89(7):1029-35. doi:  
14  
15 552 10.2105/ajph.89.7.1029.  
16  
17  
18 553 11. Cassidy JD, Carroll LJ, Côté P. The Saskatchewan health and back pain survey. The  
19  
20 554 prevalence of low back pain and related disability in Saskatchewan adults. *Spine*.  
21  
22 555 1998 Sep 1;23(17):1860-6; discussion 1867. doi: 10.1097/00007632-199809010-  
23  
24 556 00012.  
25  
26  
27 557 12. Harreby M, Kjer J, Hesselsøe G, Neergaard K. Epidemiological aspects and risk  
28  
29 558 factors for low back pain in 38-year-old men and women: a 25-year prospective  
30  
31 559 cohort study of 640 school children. *Eur Spine J*. 1996;5(5):312-8. doi:  
32  
33 560 10.1007/BF00304346.  
34  
35  
36 561 13. Waxman R, Tennant A, Helliwell P. A prospective follow-up study of low back pain  
37  
38 562 in the community. *Spine*. 2000 Aug 15;25(16):2085-90. doi: 10.1097/00007632-  
39  
40 563 200008150-00013.  
41  
42  
43 564 14. Biglarian A, Seifi B, Bakhshi E, et al. Low back pain prevalence and associated  
44  
45 565 factors in Iranian population: findings from the national health survey. *Pain Res Treat*.  
46  
47 566 2012;2012:653060. doi: 10.1155/2012/653060.  
48  
49  
50 567 15. Gupta G, Nandini N. Prevalence of low back pain in non working rural housewives of  
51  
52 568 Kanpur, India. *Int J Occup Med Environ Health*. 2015;28(2):313-20. doi:  
53  
54 569 10.13075/ijomeh.1896.00299.  
55  
56  
57  
58  
59  
60

- 1  
2  
3  
4 570 16. Ahdhi GS, Subramanian R, Saya GK, et al. Prevalence of low back pain and its  
5  
6  
7 571 relation to quality of life and disability among women in rural areas of Puducherry,  
8  
9 572 India. *Indian J Pain* [serial online] 2016 [cited 2021 Apr 18];30:111-5. Available  
10  
11 573 from: <https://www.indianjpain.org/text.asp?2016/30/2/111/186467>.  
12  
13 574 17. Bansal D, Asrar MM, Ghai B, et al. Prevalence and Impact of Low Back Pain in a  
14  
15  
16 575 Community-Based Population in Northern India. *Pain Physician*. 2020;23(4):E389-  
17  
18 576 E98.  
19  
20 577 18. Haq SA, Darmawan J, Islam MN, et al. Prevalence of rheumatic diseases and  
21  
22  
23 578 associated outcomes in rural and urban communities in Bangladesh: a COPCORD  
24  
25 579 study. *J Rheumatol*. 2005 Feb;32(2):348-53. PMID: 15693098.  
26  
27 580 19. Zahid-Al-Quadir, A., Zaman, M.M., Ahmed, S. et al. Prevalence of musculoskeletal  
28  
29  
30 581 conditions and related disabilities in Bangladeshi adults: a cross-sectional national  
31  
32 582 survey. *BMC Rheumatol* 4, 69 (2020). <https://doi.org/10.1186/s41927-020-00169-w>  
33  
34 583 20. Bangladesh Bureau of Statistics. Population and housing census 2001, preliminary  
35  
36 584 result. Dhaka: Bangladesh Bureau of Statistics; 2001. Accessed 20 Apr 2020.  
37  
38  
39 585 <http://bbs.portal.gov.bd>.  
40  
41 586 21. Islam, ME, Ahmed, S, Shahin, MA, et al. Cross-cultural adaptation and validation of  
42  
43  
44 587 revised WHO-ILAR-COPCORD core English questionnaire translated to Bangla. *Int*  
45  
46 588 *J Rheum Dis*. 2021; 00: 1– 14. <https://doi.org/10.1111/1756-185X.14176>  
47  
48 589 22. Beaton DE, Bombardier C, Guillemin F, Ferraz MB. Guidelines for the process of  
49  
50 590 cross-cultural adaptation of self-report measures. *Spine (Phila Pa 1976)*. 2000 Dec  
51  
52 591 15;25(24):3186-91. doi: 10.1097/00007632-200012150-00014.  
53  
54  
55 592 23. Chassany O, Marquis P, Scherrer B, Read NW, Finger T, Bergmann JF, Fraitag B,  
56  
57 593 Geneve J, Caulin C. Validation of a specific quality of life questionnaire for  
58  
59  
60

- 1  
2  
3  
4 594 functional digestive disorders. *Gut*. 1999 Apr;44(4):527-33. doi:  
5  
6 595 10.1136/gut.44.4.527.  
7  
8  
9 596 24. van Tulder M, Becker A, Bekkering T, et al. COST B13 Working Group on  
10  
11 597 Guidelines for the Management of Acute Low Back Pain in Primary Care. Chapter 3.  
12  
13 598 European guidelines for the management of acute nonspecific low back pain in  
14  
15 599 primary care. *Eur Spine J*. 2006 Mar;15 Suppl 2(Suppl 2):S169-91. doi:  
16  
17 600 10.1007/s00586-006-1071-2.  
18  
19  
20 601 25. Zaman MM, Rahman MM, Rahman MR, et al. Prevalence of risk factors for non-  
21  
22 602 communicable diseases in Bangladesh: Results from STEPS survey 2010. *Indian J*  
23  
24 603 *Public Health*. 2016 Jan-Mar;60(1):17-25. doi: 10.4103/0019-557X.177290.  
25  
26  
27 604 26. Islam N, Baron Basak T, OudeVoshaar MA, et al. Cross-cultural adaptation and  
28  
29 605 validation of a Bengali Health Assessment Questionnaire for use in rheumatoid  
30  
31 606 arthritis patients. *Int J Rheum Dis*. 2013 Aug;16(4):413-7. doi: 10.1111/1756-  
32  
33 607 185X.12032.  
34  
35  
36 608 27. Misra A. Ethnic-Specific Criteria for Classification of Body Mass Index: A  
37  
38 609 Perspective for Asian Indians and American Diabetes Association Position Statement.  
39  
40 610 *Diabetes Technol Ther*. 2015 Sep;17(9):667-71. doi: 10.1089/dia.2015.0007.  
41  
42  
43 611 28. Hakim, F., Bhuiyan, R., Akter, M. K., Mohit, M. A., Alam, M. F., Karim, M. R., &  
44  
45 612 Zaman, M. M. (2022). Weighting National Survey Data in Bangladesh: Why, How  
46  
47 613 and Which weight? Weighting survey data. *Bangladesh Medical Research Council*  
48  
49 614 *Bulletin*, 47(2), 118–126. <https://doi.org/10.3329/bmrcb.v47i2.57769>  
50  
51  
52 615 29. Ahmad OB, Boschi-Pinto C, Lopez AD, et al. Age Standardization of Rates: A New  
53  
54 616 WHO Standard. GPE Discussion Paper Series: No31 Geneva, Switzerland: World  
55  
56 617 Health Organization, 2001.  
57  
58  
59  
60

- 1  
2  
3  
4 618 30. WMA Declaration of Helsinki - ethical principles for medical research involving  
5  
6 619 human respondents. [Cited on: 2020 Aug 29] Available from:  
7  
8 620 <https://www.wma.net/policies-post/wma-declaration-of-helsinki-ethical-principlesfor->  
9  
10 621 [medical-research-involving-human-respondents/](https://www.wma.net/policies-post/wma-declaration-of-helsinki-ethical-principlesfor-).  
11  
12  
13 622 31. Dutmer AL, Schiphorst Preuper HR, Soer R, et al. Personal and Societal Impact of  
14  
15 623 Low Back Pain: The Groningen Spine Cohort. *Spine (Phila Pa 1976)*. 2019 Dec  
16  
17 624 15;44(24):E1443-E1451. doi: 10.1097/BRS.00000000000003174.  
18  
19  
20 625 32. Al-Awadhi AM, Olusi SO, Al-Saeid K, et al. Incidence of musculoskeletal pain in  
21  
22 626 adult Kuwaitis using the validated Arabic version of the WHO-ILAR COPCORD  
23  
24 627 Core Questionnaire. *Annals of Saudi Medicine*. 2005 Nov-Dec;25(6):459-462. DOI:  
25  
26 628 10.5144/0256-4947.2005.459.  
27  
28  
29 629 33. Aldeen Sarakbi H, Alsaed O, Hammoudeh M, et al.. Epidemiology of musculoskeletal  
30  
31 630 complaints and diseases in Qatar: A cross-sectional study. *Qatar Med J*. 2020 Nov  
32  
33 631 12;2020(2):29. doi: 10.5339/qmj.2020.29.  
34  
35  
36 632 34. Bansal D, Asrar MM, Ghai B, et al. Prevalence and Impact of Low Back Pain in a  
37  
38 633 Community-Based Population in Northern India. *Pain Physician*. 2020  
39  
40 634 Jul;23(4):E389-E398. PMID: 32709185.  
41  
42  
43 635 35. Veerapen K, Wigley RD, Valkenburg H. Musculoskeletal pain in Malaysia: a  
44  
45 636 COPCORD survey. *J Rheumatol*. 2007 Jan;34(1):207-13. PMID: 17216688.  
46  
47  
48 637 36. Sany SA, Tanjim T and Hossain MI. Low back pain and associated risk factors among  
49  
50 638 medical students in Bangladesh: a cross-sectional study. *F1000Research*. 2021 July;  
51  
52 639 10:698. Doi: 10.12688/f1000research.55151.1.  
53  
54  
55  
56  
57  
58  
59  
60

- 1  
2  
3  
4 640 37. Ali M, Ahsan GU, Hossain A. Prevalence and associated occupational factors of low  
5  
6 641 back pain among the bank employees in Dhaka City. *J Occup Health*. 2020 Jan;  
7  
8 642 62(1):e12131. doi: 10.1002/1348-9585.12131.
- 9  
10  
11 643 38. Mondal R, Sarker RC, Akter S, Banik PC, Baroi SK. Prevalence of low back pain and  
12  
13 644 its associated factors among physiotherapists in Dhaka city of Bangladesh in 2016.  
14  
15 645 *Journal of Occupational Health and Epidemiology*. 2018. 7:70–4. Doi:  
16  
17 646 10.29252/johe.7.2.70.
- 18  
19  
20 647 39. GBD 2017 Disease and Injury Incidence and Prevalence Collaborators. Global,  
21  
22 648 regional, and national incidence, prevalence, and years lived with disability for 354  
23  
24 649 diseases and injuries for 195 countries and territories, 1990-2017: a systematic  
25  
26 650 analysis for the Global Burden of Disease Study 2017. *Lancet*. 2018 Nov  
27  
28 651 10;392(10159):1789-1858. doi: 10.1016/S0140-6736(18)32279-7.
- 29  
30  
31 652 40. Hoy D, Brooks P, Blyth F, et al. The Epidemiology of low back pain. *Best Practice &*  
32  
33 653 *Research Clinical Rheumatology*. 2010 Dec;24(6):769–81. doi:  
34  
35 654 10.1016/j.berh.2010.10.002.
- 36  
37  
38 655 41. Loney PL, Stratford PW. The prevalence of low back pain in adults: a methodological  
39  
40 656 review of the literature. *Phys Ther*. 1999 Apr;79(4):384-96. PMID: 10201544.
- 41  
42  
43 657 42. Manogharan S, Kongsted A, Ferreira ML, et al. Do older adults with chronic low back  
44  
45 658 pain differ from younger adults in regards to baseline characteristics and prognosis?  
46  
47 659 *Eur J Pain (United Kingdom)*. 2017;21(5):866–73.
- 48  
49  
50 660 43. Ganesan S, Acharya AS, Chauhan R, Acharya S. Prevalence and Risk Factors for  
51  
52 661 Low Back Pain in 1,355 Young Adults: A Cross-Sectional Study. *Asian Spine J*. 2017  
53  
54 662 Aug;11(4):610-617. doi: 10.4184/asj.2017.11.4.610.

- 1  
2  
3  
4 663 44. Yue P, Liu F, Li L. Neck/shoulder pain and low back pain among school teachers in  
5  
6 664 China, prevalence and risk factors. *BMC Public Health*. 2012 Sep 14;12(1). doi:  
7  
8 665 10.1186/1471-2458-12-789.  
9  
10  
11 666 45. Craft RM, Mogil JS, Aloisi AM. Sex differences in pain and analgesia: the role of  
12  
13 667 gonadal hormones. *European Journal of Pain*. 2004 Oct;8(5):397–411. doi:  
14  
15 668 10.1016/j.ejpain.2004.01.003  
16  
17  
18 669 46. Berkley KJ. Sex differences in pain. *Behav Brain Sci*. 1997 Sep;20(3):371–80. doi:  
19  
20 670 10.1017/s0140525x97221485.  
21  
22  
23 671 47. Keogh E. Sex Differences in Pain. *Reviews in Pain*. 2008 Dec;2(2):4–7. doi:  
24  
25 672 10.1177/204946370800200203.  
26  
27  
28 673 48. Leboeuf-Yde C. Body Weight and Low Back Pain. *Spine*. 2000 Jan;25(2):226. doi:  
29  
30 674 10.1097/00007632-200001150-00015.  
31  
32 675 49. Webb R, Brammah T, Lunt M, et al. Prevalence and Predictors of Intense, Chronic,  
33  
34 676 and Disabling Neck and Back Pain in the UK General Population. *Spine*. 2003  
35  
36 677 Jun;28(11):1195–202. doi: 10.1097/01.BRS.0000067430.49169.01.  
37  
38  
39 678 50. Koyanagi A, Stickley A, Garin N, Miret M, Ayuso-Mateos JL, Leonardi M, Koskinen  
40  
41 679 S, Galas A, Haro JM. The association between obesity and back pain in nine  
42  
43 680 countries: a cross-sectional study. *BMC Public Health*. 2015 Feb 11;15:123. doi:  
44  
45 681 10.1186/s12889-015-1362-9.  
46  
47  
48 682 51. Shmagel A, Foley R, Ibrahim H. Epidemiology of Chronic Low Back Pain in US  
49  
50 683 Adults: Data From the 2009-2010 National Health and Nutrition Examination Survey.  
51  
52 684 *Arthritis Care & Research*. 2016 Oct 26;68(11):1688–94. doi: 10.1002/acr.22890.  
53  
54  
55  
56  
57  
58  
59  
60



- 1  
2  
3  
4 685 52. Deyo RA, Tsui-wu YJ. Descriptive Epidemiology of Low-back Pain and Its Related  
5  
6 686 Medical Care in the United States. *Spine*. 1987 Apr;12(3):264–8. doi:  
7  
8 687 10.1097/00007632-198704000-00013.  
9  
10  
11 688 53. Rubin DI. Epidemiology and Risk Factors for Spine Pain. *Neurologic Clinics*. 2007  
12  
13 689 May;25(2):353–71. doi: 10.1016/j.ncl.2007.01.004.  
14  
15  
16 690 54. Frymoyer JW, Pope MH, Costanza MC, et al. Epidemiologic Studies of Low-Back  
17  
18 691 Pain. *Spine*. 1980 Sep;5(5):419–23. doi: 10.1097/00007632-198009000-00005.  
19  
20  
21 692 55. Coggon D, Ntani G, Palmer KT, et al. Drivers of international variation in prevalence  
22  
23 693 of disabling low back pain: Findings from the Cultural and Psychosocial Influences  
24  
25 694 on Disability study. *European journal of pain*. 2018 Jun 27;23(1):35–45. doi:  
26  
27 695 10.1002/ejp.1255.  
28  
29  
30 696 56. Hestbaek L, Korsholm L, Leboeuf-Yde C, Kyvik KO. Does socioeconomic status in  
31  
32 697 adolescence predict low back pain in adulthood? A repeated cross-sectional study of  
33  
34 698 4,771 Danish adolescents. *Eur Spine J*. 2008 Dec;17(12):1727-34. doi:  
35  
36 699 10.1007/s00586-008-0796-5.  
37  
38  
39 700 57. Harris IA, Young JM, Rae H, et al. Factors associated with back pain after physical  
40  
41 701 injury: a survey of consecutive major trauma patients. *Spine (Phila Pa 1976)*. 2007  
42  
43 702 Jun 15;32(14):1561-5. doi: 10.1097/BRS.0b013e318067dce8.  
44  
45  
46 703 58. Samartzis D, Bow C, Karppinen J, Luk KDK, Cheung BMY, Cheung KMC.  
47  
48 704 Hypertension is Independently Associated with Lumbar Disc Degeneration: A Large-  
49  
50 705 Scale Population-Based Study. *Global Spine Journal*, vol. 4, no. 1\_suppl, May 2014,  
51  
52 706 p. s-0034-1376579-s-0034-1376579. doi:10.1055/s-0034-1376579.  
53  
54  
55  
56  
57  
58  
59  
60

- 1  
2  
3  
4 707 59. Leino-Arjas P, Solovieva S, Kirjonen J, Reunanen A, Riihimäki H. Cardiovascular  
5  
6 708 risk factors and low-back pain in a long-term follow-up of industrial employees.  
7  
8 709 Scand J Work Environ Health. 2006 Feb;32(1):12-9. doi: 10.5271/sjweh.971.  
9  
10  
11 710 60. Bae Y-H, Shin J-S, Lee J, et al. Association between Hypertension and the Prevalence  
12  
13 711 of Low Back Pain and Osteoarthritis in Koreans: A Cross-Sectional Study. Fuchs FD,  
14  
15 712 editor. PLoS ONE. 2015 Sep 22;10(9):e0138790. doi: 10.1371/journal.pone.0138790.  
16  
17  
18 713 61. Rahman MA, Khan MA, Akter MR, Islam MA, Khan MK. Proportion of Low Back  
19  
20 714 Pain among Physicians Working in a Tertiary Level Hospital of Bangladesh.  
21  
22 715 Mymensingh Medical Journal: MMJ. 2021 Apr 1;30(2):262-6. PMID: 33830101  
23  
24  
25  
26  
27  
28  
29  
30  
31  
32  
33  
34  
35  
36  
37  
38  
39  
40  
41  
42  
43  
44  
45  
46  
47  
48  
49  
50  
51  
52  
53  
54  
55  
56  
57  
58  
59  
60

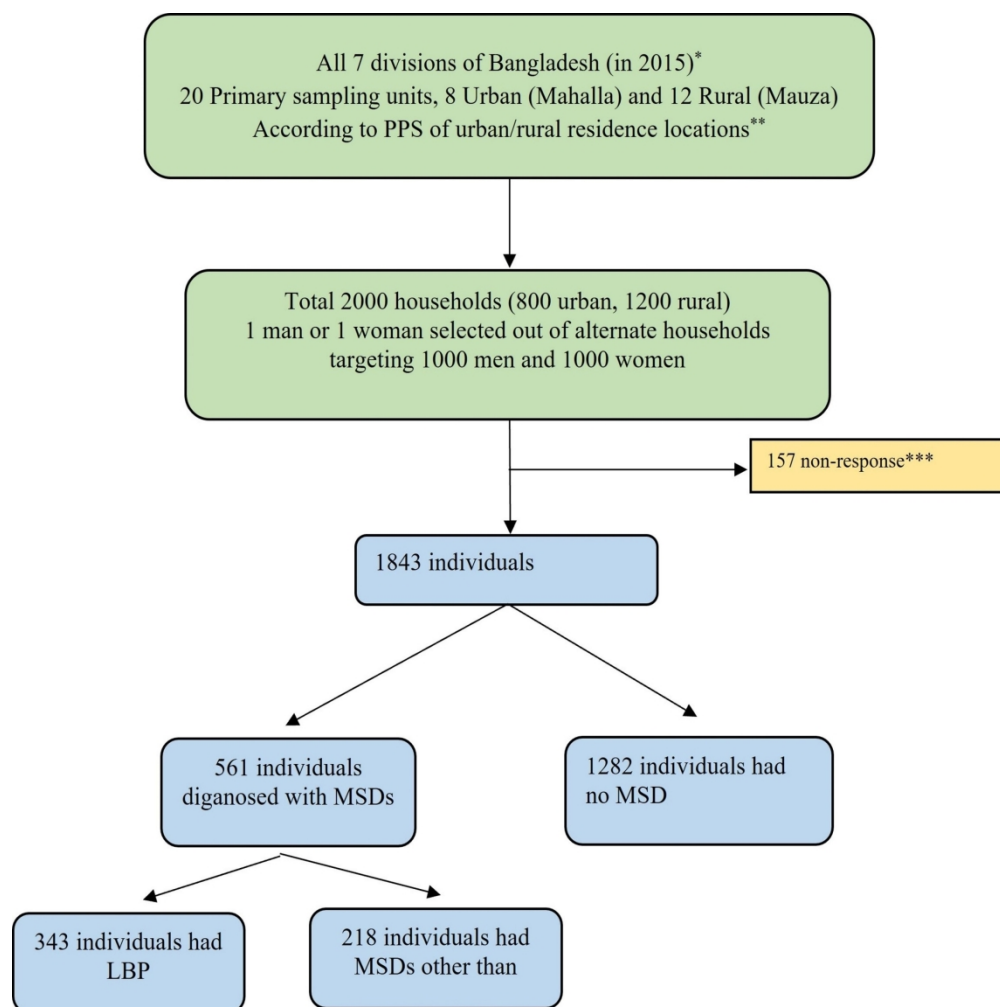

39 Caption:

40 Fig. 1 Flow chart on the selection of low back pain patients from the national survey on musculoskeletal  
41 conditions in Bangladesh (2015) adapted from Ahmad Zahid-Al-Quadir et al 21

42 Legend:

43 \* Eight divisions from Sept 2015. Randomly 15 districts were selected out of 64.

44 \*\* PPS indicates population proportion to size.

45 \*\*\* Out-migration, broken house, locked house, no tenant, out of home, refusal. Two recall visits were  
46 done if the selected house was locked and the person chosen was not available at home at the time of the  
47 interviewer's visit. In case of non-participation after the second recall visit, the targeted  
48 household/individual was declared non-respondents.

49 190x190mm (330 x 330 DPI)

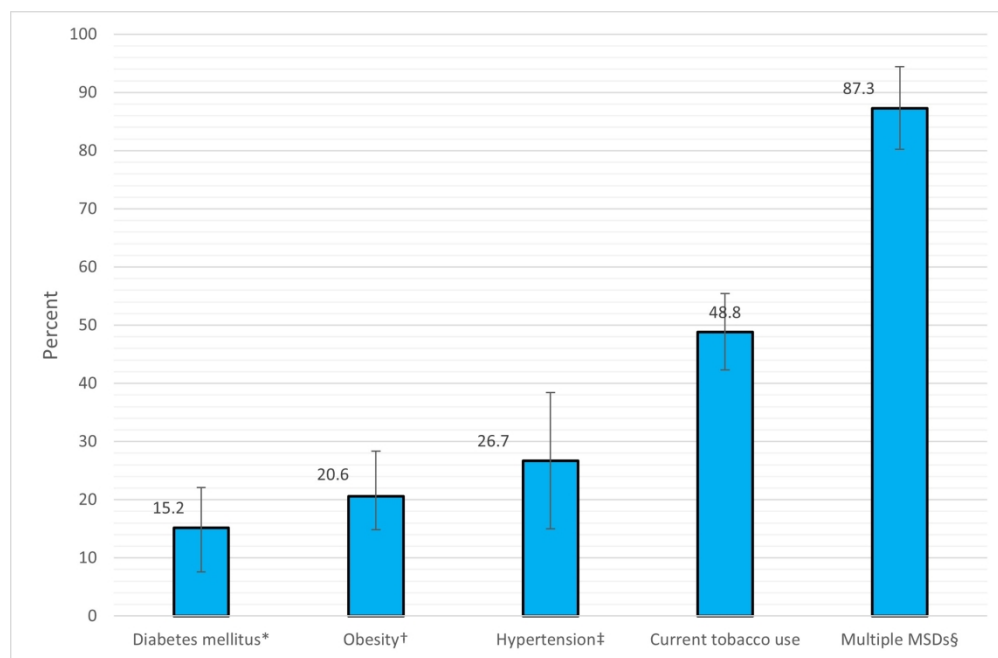

Caption:Fig. Weighted prevalences (percent) of low back pain in co-morbid conditions (error bars indicate 95% confidence intervals)Legend:\*Diabetes was defined as random capillary glucose level  $\geq 11.1$  or on medication for diabetes†Obesity is defined as body mass index  $\geq 25$  kg/m<sup>2</sup>;‡Hypertension was defined as systolic blood pressure  $\geq 140$  or diastolic blood pressure  $\geq 90$  or medication for hypertension

597x389mm (330 x 330 DPI)

**STROBE 2007 (v4) Statement—Checklist of items that should be included in reports of *cross-sectional studies***

| Section/Topic                | Item # | Recommendation                                                                                                                                                                       | Reported on page # |
|------------------------------|--------|--------------------------------------------------------------------------------------------------------------------------------------------------------------------------------------|--------------------|
| <b>Title and abstract</b>    | 1      | (a) Indicate the study's design with a commonly used term in the title or the abstract                                                                                               | 1                  |
|                              |        | (b) Provide in the abstract an informative and balanced summary of what was done and what was found                                                                                  | 2                  |
| <b>Introduction</b>          |        |                                                                                                                                                                                      |                    |
| Background/rationale         | 2      | Explain the scientific background and rationale for the investigation being reported                                                                                                 | 4, 5               |
| Objectives                   | 3      | State specific objectives, including any prespecified hypotheses                                                                                                                     | 5                  |
| <b>Methods</b>               |        |                                                                                                                                                                                      |                    |
| Study design                 | 4      | Present key elements of study design early in the paper                                                                                                                              | 5                  |
| Setting                      | 5      | Describe the setting, locations, and relevant dates, including periods of recruitment, exposure, follow-up, and data collection                                                      | 5, 6               |
| Participants                 | 6      | (a) Give the eligibility criteria, and the sources and methods of selection of participants                                                                                          | 5                  |
| Variables                    | 7      | Clearly define all outcomes, exposures, predictors, potential confounders, and effect modifiers. Give diagnostic criteria, if applicable                                             | 6                  |
| Data sources/<br>measurement | 8*     | For each variable of interest, give sources of data and details of methods of assessment (measurement). Describe comparability of assessment methods if there is more than one group | 5, 6               |
| Bias                         | 9      | Describe any efforts to address potential sources of bias                                                                                                                            | 5, 6               |
| Study size                   | 10     | Explain how the study size was arrived at                                                                                                                                            | 5                  |
| Quantitative variables       | 11     | Explain how quantitative variables were handled in the analyses. If applicable, describe which groupings were chosen and why                                                         | 6                  |
| Statistical methods          | 12     | (a) Describe all statistical methods, including those used to control for confounding                                                                                                | 7                  |
|                              |        | (b) Describe any methods used to examine subgroups and interactions                                                                                                                  | 7                  |
|                              |        | (c) Explain how missing data were addressed                                                                                                                                          | 7                  |
|                              |        | (d) If applicable, describe analytical methods taking account of sampling strategy                                                                                                   | 7                  |
|                              |        | (e) Describe any sensitivity analyses                                                                                                                                                | Not applicable     |
| <b>Results</b>               |        |                                                                                                                                                                                      |                    |

|                          |     |                                                                                                                                                                                                              |                |
|--------------------------|-----|--------------------------------------------------------------------------------------------------------------------------------------------------------------------------------------------------------------|----------------|
| Participants             | 13* | (a) Report numbers of individuals at each stage of study—eg numbers potentially eligible, examined for eligibility, confirmed eligible, included in the study, completing follow-up, and analysed            | 5, 22          |
|                          |     | (b) Give reasons for non-participation at each stage                                                                                                                                                         | 19             |
|                          |     | (c) Consider use of a flow diagram                                                                                                                                                                           | 19             |
| Descriptive data         | 14* | (a) Give characteristics of study participants (eg demographic, clinical, social) and information on exposures and potential confounders                                                                     | 7, 8           |
|                          |     | (b) Indicate number of participants with missing data for each variable of interest                                                                                                                          | Not applicable |
| Outcome data             | 15* | Report numbers of outcome events or summary measures                                                                                                                                                         | 8, 9           |
| Main results             | 16  | (a) Give unadjusted estimates and, if applicable, confounder-adjusted estimates and their precision (eg, 95% confidence interval). Make clear which confounders were adjusted for and why they were included | 9              |
|                          |     | (b) Report category boundaries when continuous variables were categorized                                                                                                                                    | 6              |
|                          |     | (c) If relevant, consider translating estimates of relative risk into absolute risk for a meaningful time period                                                                                             | Not applicable |
| Other analyses           | 17  | Report other analyses done—eg analyses of subgroups and interactions, and sensitivity analyses                                                                                                               | Not applicable |
| <b>Discussion</b>        |     |                                                                                                                                                                                                              |                |
| Key results              | 18  | Summarise key results with reference to study objectives                                                                                                                                                     | 10             |
| Limitations              | 19  | Discuss limitations of the study, taking into account sources of potential bias or imprecision. Discuss both direction and magnitude of any potential bias                                                   | 3              |
| Interpretation           | 20  | Give a cautious overall interpretation of results considering objectives, limitations, multiplicity of analyses, results from similar studies, and other relevant evidence                                   | 11, 12         |
| Generalisability         | 21  | Discuss the generalisability (external validity) of the study results                                                                                                                                        | 13             |
| <b>Other information</b> |     |                                                                                                                                                                                                              |                |
| Funding                  | 22  | Give the source of funding and the role of the funders for the present study and, if applicable, for the original study on which the present article is based                                                | 14             |

\*Give information separately for cases and controls in case-control studies and, if applicable, for exposed and unexposed groups in cohort and cross-sectional studies.

**Note:** An Explanation and Elaboration article discusses each checklist item and gives methodological background and published examples of transparent reporting. The STROBE checklist is best used in conjunction with this article (freely available on the Web sites of PLoS Medicine at <http://www.plosmedicine.org/>, Annals of Internal Medicine at <http://www.annals.org/>, and Epidemiology at <http://www.epidem.com/>). Information on the STROBE Initiative is available at [www.strobe-statement.org](http://www.strobe-statement.org).
